# Supplementary material for: Integrative System Biology Analysis of Transcriptomic Responses to Drought Stress in Soybean (Glycine max L.)
Source: MDPI journal article supplement (doi:10.3390/genes13101732), 2022-09-26
Supplement: s1 [file s1]

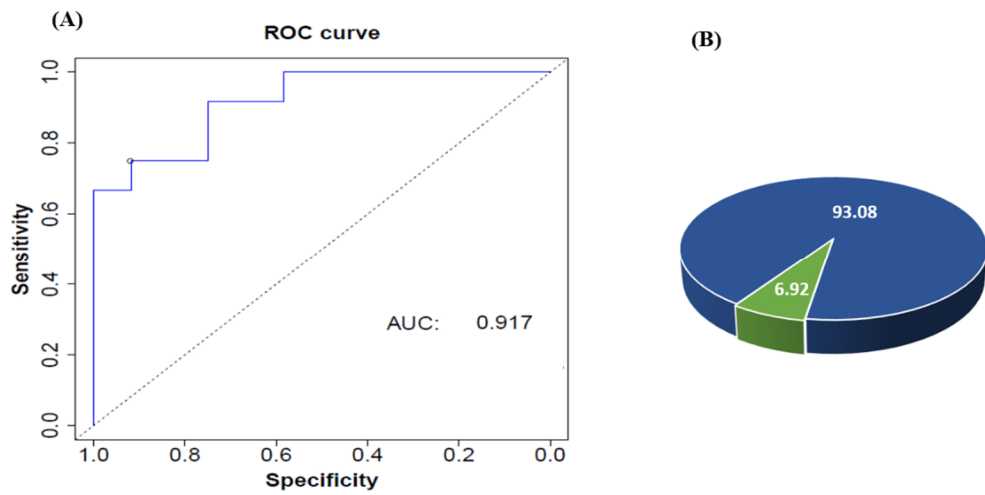

**Figure S1.** Cross-validation analysis of ranked genes (A) ROC curve for the hub genes. (B) The predictive accuracy (blue slice) and error (green slice) rate of LOOCV for hub genes.
