# Supplementary material for: Integrative System Biology Analysis of Transcriptomic Responses to Drought Stress in Soybean (Glycine max L.)
Source: Genes (Basel). 2022 Sep 26;13(10):1732. doi: 10.3390/genes13101732 (PMC9602024; doi:10.3390/genes13101732)
Supplement: Supplementary file 1 [file genes-13-01732-s001.zip › genes-1833675-supplementary tables.xlsx]

## Sheet: Sheet1
Table S1. List of identified DEGs by meta-analysis of drought stress data and their corresponding UniGene and Transcript stable IDs.
ID	P_value	Up.Down.regulate	Transcript.stable.ID	UniGene.ID
GLYMA_01G001600	0.00227287	up	KRH74138
GLYMA_01G002000	1.16e-19	down	KRH74144	Gma.64094
GLYMA_01G003000	1.16e-19	down	KRH74155	Gma.15643
GLYMA_01G004000	0.00289033	up	KRH74170	Gma.26600
GLYMA_01G004200	1.45e-19	up	KRH74174
GLYMA_01G004300	0.0097951	up	KRH74178	Gma.30794
GLYMA_01G005000	0.0071107	down	KRH74187	Gma.9001
GLYMA_01G006000	1.16e-19	down	KRH74208	Gma.55340
GLYMA_01G006200	0.000382373	down	KRH74211	Gma.58700
GLYMA_01G006700	0.000172491	down	RCW19547
GLYMA_01G008800	0.00413526	up	KRH74270	Gma.20765
GLYMA_01G009200	1.16e-19	down	KRH74275
GLYMA_01G009300	1.22e-06	up	KRH74276
GLYMA_01G009700	1.22e-06	up	KRH74281	Gma.50120
GLYMA_01G010200	4.25e-05	down	KRH74288	Gma.31315
GLYMA_01G010400	2.39e-06	up	KRH74291	Gma.55019
GLYMA_01G011300	1.16e-19	down	KRH74305
GLYMA_01G011700	1.16e-19	down	KRH74309
GLYMA_01G013500	1.45e-19	up	KRH74328
GLYMA_01G015100	0.00936303	down	KRH74372	Gma.23968
GLYMA_01G016800	0.00231542	down	KRH74398	Gma.1358
GLYMA_01G018000	0.0090181	down	KRH74412	Gma.19414
GLYMA_01G018800	0.000252323	down	KRH74424
GLYMA_01G020900	1.16e-19	down	KRH74456	Gma.23140
GLYMA_01G022400	2.89e-05	up	RCW19550
GLYMA_01G023000	0.000173719	down	KRH74484	Gma.52735
GLYMA_01G023300	4.95e-06	down	KRH74492	Gma.4188
GLYMA_01G024300	1.45e-19	up	KRH74506
GLYMA_01G025100	1.54e-05	down	KRH74514
GLYMA_01G028500	1.45e-19	up	KRH74564	Gma.52437
GLYMA_01G028700	0.000116972	down	KRH74566
GLYMA_01G030500	0.000953935	down	KRH74596	Gma.15490
GLYMA_01G031900	0.00292454	down	KRH74621
GLYMA_01G032300	1.45e-19	up	KRH74625	Gma.806
GLYMA_01G034000	1.16e-19	down	KRH74644	Gma.64284
GLYMA_01G036900	1.45e-19	up	KRH74695	Gma.1944
GLYMA_01G040200	1.16e-19	down	KRH74742	Gma.34014
GLYMA_01G043600	8.6e-06	down	KRH74800	Gma.55686
GLYMA_01G044000	7.59e-05	down	KRH74808	Gma.55679
GLYMA_01G044200	1.45e-19	up	KRH74812	Gma.55395
GLYMA_01G050100	1.16e-19	down	KRH74893
GLYMA_01G050900	7.78e-05	down	KRH74903	Gma.2737
GLYMA_01G053800	0.00458535	up	KRH74950	Gma.7467
GLYMA_01G054800	0.00569368	down	KRH74981
GLYMA_01G055400	0.00270064	down	KRH74989	Gma.18330
GLYMA_01G058000	0.000198347	up	KRH75027	Gma.56509
GLYMA_01G058500	0.000513495	down	KRH75041
GLYMA_01G059200	0.00175933	up	KRH75054
GLYMA_01G064600	0.000245678	up	KRH75134
GLYMA_01G071700	4.71e-05	down	KRH75229
GLYMA_01G074600	1.45e-19	up	KRH75274
GLYMA_01G076100	1.16e-19	down	KRH75291
GLYMA_01G076900	1.07e-06	down	KRH75301
GLYMA_01G078800	1.16e-19	down	KRH75328	Gma.16419
GLYMA_01G079100	0.00198078	down	KRH75335	Gma.19419
GLYMA_01G084500	0.000664694	down	KRH75418
GLYMA_01G084700	0.00883851	down	KRH75430	Gma.8014
GLYMA_01G087500	0.00487486	down	KRH75484	Gma.61527
GLYMA_01G087900	0.000161798	down	KRH75488
GLYMA_01G092000	9.38e-05	down	KRH75550
GLYMA_01G092900	1.45e-19	up	KRH75561
GLYMA_01G096200	1.16e-19	down	KRH75606	Gma.13161
GLYMA_01G097100	1.16e-19	down	KRH75624	Gma.55431
GLYMA_01G098700	0.0016291	up	KRH75648	Gma.55164
GLYMA_01G100900	0.00762966	up	KRH75683	Gma.25161
GLYMA_01G103500	1.16e-19	down	KRH75717	Gma.61402
GLYMA_01G108700	1.45e-19	up	KRH75779	Gma.52442
GLYMA_01G109700	0.00236111	up	KRH75791
GLYMA_01G113000	1.16e-19	down	KRH75834	Gma.60459
GLYMA_01G115900	0.000385734	down	KRH75874	Gma.55002
GLYMA_01G116100	3.35e-05	down	KRH75883
GLYMA_01G121700	1.16e-19	down	KRH75974	Gma.13162
GLYMA_01G124500	1.16e-19	down	KRH76012	Gma.56946
GLYMA_01G124700	1.97e-05	down	KRH76014
GLYMA_01G126600	1.45e-19	up	KRH76040	Gma.5099
GLYMA_01G129400	1.22e-06	up	KRH76075	Gma.21042
GLYMA_01G131300	7.49e-05	down	KRH76097
GLYMA_01G132500	0.0019844	down	KRH76117	Gma.16710
GLYMA_01G133400	1.22e-06	up	KRH76131	Gma.4320
GLYMA_01G134600	1.45e-19	up	KRH76149	Gma.21733
GLYMA_01G142400	1.16e-19	down	KRH76259	Gma.1303
GLYMA_01G143100	6.41e-05	up	KRH76270	Gma.22628
GLYMA_01G145400	0.000574099	down	KRH76312
GLYMA_01G147700	0.000141026	down	KRH76351
GLYMA_01G149100	0.00871851	down	KRH76378
GLYMA_01G149300	1.07e-06	down	KRH76384	Gma.1479
GLYMA_01G151400	1.16e-19	down	KRH76417
GLYMA_01G151600	0.00275095	up	KRH76420
GLYMA_01G151700	1.11e-05	down	KRH76423
GLYMA_01G152100	7.54e-05	down	KRH76429
GLYMA_01G157300	0.000380556	down	KRH76517	Gma.24472
GLYMA_01G157400	2.95e-05	down	KRH76518
GLYMA_01G157500	0.00336312	down	KRH76519	Gma.36318
GLYMA_01G162500	0.000136832	up	KRH76595	Gma.52464
GLYMA_01G163000	0.00022516	up	KRH76606
GLYMA_01G163100	1.16e-19	down	KRH76608
GLYMA_01G164000	1.89e-05	down	KRH76624	Gma.11990
GLYMA_01G165400	1.16e-19	down	KRH76648
GLYMA_01G165900	0.00360552	up	KRH76654	Gma.26059
GLYMA_01G166100	1.22e-06	up	KRH76656
GLYMA_01G167800	9.86e-05	down	KRH76679
GLYMA_01G171400	1.22e-06	up	KRH76740
GLYMA_01G172700	1.45e-19	up	KRH76760	Gma.57477
GLYMA_01G177400	0.000172222	up	KRH76850
GLYMA_01G179400	1.45e-19	up	KRH76886	Gma.23207
GLYMA_01G179900	5.76e-05	down	KRH76895
GLYMA_01G180500	1.16e-19	down	KRH76906
GLYMA_01G181000	1.22e-06	up	KRH76913
GLYMA_01G181800	1.45e-19	up	KRH76922
GLYMA_01G182600	1.16e-19	down	KRH76931	Gma.59086
GLYMA_01G183300	6.88e-06	up	KRH76939
GLYMA_01G185400	1.16e-19	down	KRH76992	Gma.53467
GLYMA_01G185600	0.00329852	down	KRH76994	Gma.22694
GLYMA_01G185800	1.45e-19	up	KRH76998	Gma.28816
GLYMA_01G186600	1.16e-19	down	KRH77006	Gma.27287
GLYMA_01G186800	1.16e-19	down	KRH77008	Gma.17754
GLYMA_01G187300	0.000360084	down	KRH77013
GLYMA_01G187700	1.45e-19	up	KRH77017	Gma.3604
GLYMA_01G188100	2.08e-06	down	KRH77021	Gma.6893
GLYMA_01G190500	1.45e-19	up	KRH77063
GLYMA_01G191200	1.16e-19	down	KRH77071
GLYMA_01G193600	0.000570198	up	KRH77122	Gma.1047
GLYMA_01G197800	3.9e-05	down	KRH77190	Gma.8468
GLYMA_01G198500	5.25e-05	down	KRH77202	Gma.601
GLYMA_01G199700	1.37e-05	down	KRH77219	Gma.12807
GLYMA_01G199900	0.000128759	up	KRH77222
GLYMA_01G202000	0.00409541	up	KRH77253	Gma.56119
GLYMA_01G204400	1.16e-19	down	KRH77291	Gma.10342
GLYMA_01G205700	3.52e-05	down	KRH77311
GLYMA_01G208200	1.16e-19	down	KRH77347	Gma.54649
GLYMA_01G211200	0.00252114	up	KRH77400	Gma.5356
GLYMA_01G213300	0.00106776	down	KRH77433
GLYMA_01G213700	1.16e-19	down	KRH77442
GLYMA_01G214300	1.16e-19	down	KRH77457	Gma.16465
GLYMA_01G214600	0.00597416	up	KRH77461	Gma.6033
GLYMA_01G215100	1.45e-19	up	KRH77468	Gma.26218
GLYMA_01G215400	1.16e-19	down	KRH77471
GLYMA_01G215500	1.16e-19	down	KRH77473	Gma.10695
GLYMA_01G217400	2.39e-06	up	KRH77502	Gma.29131
GLYMA_01G219500	1.16e-19	down	KRH77534
GLYMA_01G221200	1.45e-19	up	KRH77567
GLYMA_01G221300	1.16e-19	down	KRH77569
GLYMA_01G221400	1.16e-19	down	KRH77570
GLYMA_01G224800	1.45e-19	up	KRH77637	Gma.29025
GLYMA_01G225500	1.45e-19	up	KRH77646
GLYMA_01G226000	1.16e-19	down	KRH77659	Gma.4637
GLYMA_01G228700	1.45e-19	up	KRH77699	Gma.10675
GLYMA_01G229200	9.47e-06	down	KRH77707
GLYMA_01G231800	1.16e-19	down	KRH77753
GLYMA_01G232400	1.45e-19	up	KRH77759	Gma.8449
GLYMA_01G234000	0.000682864	up	KRH77790	Gma.38451
GLYMA_01G234500	1.16e-19	down	KRH77800	Gma.10864
GLYMA_01G235600	1.45e-19	up	KRH77822	Gma.4360
GLYMA_01G236500	1.45e-19	up	KRH77834	Gma.36828
GLYMA_01G236600	0.000107486	up	KRH77835	Gma.10737
GLYMA_01G236800	1.07e-06	down	KRH77840
GLYMA_01G238800	1.45e-19	up	KRH77866	Gma.61559
GLYMA_01G239500	1.45e-19	up	KRH77875	Gma.30057
GLYMA_01G239600	1.45e-19	up	KRH77876	Gma.19376
GLYMA_01G241000	0.00625661	up	KRH77908	Gma.32437
GLYMA_01G241200	0.000351541	down	KRH77910	Gma.27757
GLYMA_01G242200	0.00569762	down	KRH77927	Gma.6478
GLYMA_01G243400	1.16e-19	down	KRH77943
GLYMA_01G244200	3.95e-05	up	KRH77955
GLYMA_02G000400	1.45e-19	up	KRH69047	Gma.5030
GLYMA_02G000600	1.45e-19	up	KRH69049	Gma.4802
GLYMA_02G001100	1.45e-19	up	KRH69057	Gma.6312
GLYMA_02G001500	1.16e-19	down	KRH69063
GLYMA_02G001700	1.16e-19	down	KRH69065
GLYMA_02G002000	1.11e-05	down	KRH69069
GLYMA_02G002800	0.00200392	up	KRH69083
GLYMA_02G007700	0.00035824	down	KRH69148
GLYMA_02G009500	1.45e-19	up	KRH69175	Gma.27492
GLYMA_02G011100	3.95e-05	up	KRH69199	Gma.61273
GLYMA_02G013700	1.45e-19	up	KRH69235
GLYMA_02G014000	7.91e-05	up	RCW19498
GLYMA_02G014900	1.16e-19	down	KRH69255
GLYMA_02G015100	9.38e-05	down	KRH69258	Gma.27238
GLYMA_02G015200	1.16e-19	down	KRH69259	Gma.51920
GLYMA_02G015300	1.16e-19	down	KRH69261
GLYMA_02G015600	8.6e-06	down	KRH69265	Gma.27278
GLYMA_02G016100	4.66e-06	up	KRH69270	Gma.23548
GLYMA_02G017100	1.45e-19	up	KRH69280	Gma.51609
GLYMA_02G019200	1.16e-19	down	KRH69311
GLYMA_02G019400	1.45e-19	up	KRH69315	Gma.2198
GLYMA_02G019600	1.2e-05	down	KRH69318	Gma.10899
GLYMA_02G023500	3.82e-05	down	KRH69388
GLYMA_02G023800	1.45e-19	up	KRH69391	Gma.3149
GLYMA_02G023900	1.45e-19	up	KRH69392	Gma.26985
GLYMA_02G024200	0.000461538	up	KRH69396
GLYMA_02G026400	1.16e-19	down	KRH69429
GLYMA_02G028000	1.45e-19	up	KRH69451
GLYMA_02G028200	1.45e-19	up	KRH69453	Gma.31685
GLYMA_02G028700	1.45e-19	up	KRH69459
GLYMA_02G028800	1.45e-19	up	KRH69460
GLYMA_02G031700	0.000166667	down	KRH69501
GLYMA_02G032300	1.16e-19	down	KRH69512	Gma.31695
GLYMA_02G034600	1.45e-19	up	KRH69559	Gma.52518
GLYMA_02G035900	0.00232869	up	KRH69587	Gma.13429
GLYMA_02G036300	0.00404667	up	KRH69592	Gma.63946
GLYMA_02G036400	4.95e-06	down	KRH69594	Gma.86
GLYMA_02G036500	3.06e-06	down	KRH69596	Gma.1808
GLYMA_02G039000	1.16e-19	down	KRH69636
GLYMA_02G039400	2.62e-05	down	KRH69640
GLYMA_02G039700	1.16e-19	down	KRH69643
GLYMA_02G042500	1.45e-19	up	KRH69697	Gma.2833
GLYMA_02G045100	1.16e-19	down	KRH69733	Gma.12536
GLYMA_02G046600	4.17e-05	down	KRH69761
GLYMA_02G047000	1.16e-19	down	KRH69767	Gma.9541
GLYMA_02G047800	1.45e-19	up	KRH69777	Gma.54691
GLYMA_02G048400	1.16e-19	down	KRH69784	Gma.5461
GLYMA_02G048800	0.00392466	down	KRH69789
GLYMA_02G051600	1.16e-19	down	KRH69829
GLYMA_02G052500	1.45e-19	up	KRH69852
GLYMA_02G054200	1.16e-19	down	KRH69875	Gma.12911
GLYMA_02G055900	1.16e-19	down	KRH69907
GLYMA_02G057400	1.45e-19	up	KRH69929
GLYMA_02G058200	1.45e-19	up	KRH69939	Gma.30329
GLYMA_02G059600	0.00237857	up	KRH69961	Gma.724
GLYMA_02G061100	3.06e-06	down	KRH69993	Gma.31764
GLYMA_02G061400	0.000374566	down	KRH69999
GLYMA_02G063300	1.16e-19	down	KRH70027
GLYMA_02G064700	0.00151444	down	KRH70044	Gma.30726
GLYMA_02G069400	1.16e-19	down	KRH70115
GLYMA_02G073700	1.16e-19	down	KRH70184
GLYMA_02G074000	0.00226303	down	KRH70190	Gma.2489
GLYMA_02G079300	0.00131503	down	KRH70260
GLYMA_02G080900	1.16e-19	down	KRH70281	Gma.5418
GLYMA_02G082000	2.08e-06	down	KRH70307
GLYMA_02G086100	1.45e-19	up	KRH70363
GLYMA_02G087400	1.16e-19	down	KRH70384
GLYMA_02G089500	1.45e-19	up	KRH70415	Gma.36747
GLYMA_02G090200	0.00526633	up	KRH70435	Gma.52730
GLYMA_02G091600	4.95e-06	down	KRH70459
GLYMA_02G093500	0.00551484	up	KRH70487
GLYMA_02G094900	1.16e-19	down	KRH70513
GLYMA_02G098700	3.06e-06	down	KRH70594
GLYMA_02G099500	0.0012608	up	KRH70603
GLYMA_02G100000	1.16e-19	down	KRH70612
GLYMA_02G104200	1.45e-19	up	KRH70676	Gma.27490
GLYMA_02G104300	1.45e-19	up	KRH70677
GLYMA_02G104600	1.16e-19	down	KRH70680
GLYMA_02G104900	7.77e-06	down	KRH70683
GLYMA_02G108200	1.22e-06	up	KRH70740
GLYMA_02G108600	1.16e-19	down	KRH70746
GLYMA_02G109100	1.16e-19	down	KRH70751	Gma.7784
GLYMA_02G111800	0.000203798	down	KRH70813
GLYMA_02G116900	0.00382577	down	KRH70902	Gma.21397
GLYMA_02G119600	1.16e-19	down	KRH70942
GLYMA_02G125900	1.45e-19	up	KRH71052	Gma.27743
GLYMA_02G126800	1.45e-19	up	KRH71062	Gma.14097
GLYMA_02G128800	1.45e-19	up	KRH71091	Gma.10523
GLYMA_02G132100	1.16e-19	down	KRH71138	Gma.18986
GLYMA_02G133900	0.00123792	down	KRH71161
GLYMA_02G134000	1.45e-19	up	KRH71162
GLYMA_02G134500	1.45e-19	up	KRH71169	Gma.44390
GLYMA_02G136000	1.16e-19	down	KRH71196	Gma.10827
GLYMA_02G136200	1.16e-19	down	KRH71200	Gma.56250
GLYMA_02G136300	1.16e-19	down	KRH71201	Gma.63957
GLYMA_02G136700	1.45e-19	up	KRH71205	Gma.4105
GLYMA_02G139700	0.0085117	down	KRH71297	Gma.752
GLYMA_02G140100	1.16e-19	down	KRH71303
GLYMA_02G141700	0.000767776	down	KRH71328	Gma.55236
GLYMA_02G143300	1.16e-19	down	KRH71354
GLYMA_02G145100	1.16e-19	down	KRH71389
GLYMA_02G145300	0.000121813	up	KRH71391	Gma.6752
GLYMA_02G148400	1.45e-19	up	KRH71444	Gma.2439
GLYMA_02G149700	0.00537873	down	KRH71466	Gma.1765
GLYMA_02G153000	1.16e-19	down	KRH71536	Gma.57533
GLYMA_02G182800	1.16e-19	down	KRH71976	Gma.26822
GLYMA_02G190700	1.22e-06	up	KRH72085	Gma.20157
GLYMA_02G191500	0.00389274	down	KRH72098	Gma.53962
GLYMA_02G195000	1.45e-19	up	KRH72163
GLYMA_02G195300	1.45e-19	up	KRH72168	Gma.53271
GLYMA_02G197600	1.16e-19	down	KRH72197
GLYMA_02G201500	1.16e-19	down	KRH72266	Gma.3037
GLYMA_02G202500	0.00230969	down	KRH72280
GLYMA_02G203300	1.16e-19	down	KRH72296	Gma.49
GLYMA_02G203400	1.45e-19	up	KRH72297
GLYMA_02G204700	0.00150492	down	KRH72314
GLYMA_02G208000	8.82e-06	up	KRH72376	Gma.2027
GLYMA_02G208400	1.45e-19	up	KRH72381
GLYMA_02G211700	2.39e-06	up	KRH72425	Gma.56812
GLYMA_02G212700	0.00141533	down	KRH72440
GLYMA_02G213500	1.45e-19	up	KRH72453
GLYMA_02G213700	1.16e-19	down	KRH72456	Gma.32528
GLYMA_02G214400	0.00241177	down	KRH72463
GLYMA_02G215700	1.45e-19	up	KRH72476	Gma.8538
GLYMA_02G217600	0.00110937	up	KRH72509
GLYMA_02G218100	4.64e-05	down	KRH72526
GLYMA_02G218300	1.16e-19	down	KRH72528	Gma.62172
GLYMA_02G224100	0.00879367	up	KRH72633	Gma.9164
GLYMA_02G225300	9.47e-06	down	KRH72653
GLYMA_02G226900	0.000109231	down	KRH72677
GLYMA_02G227000	0.00014794	up	KRH72679	Gma.3331
GLYMA_02G227200	4.66e-06	up	KRH72682	Gma.35879
GLYMA_02G227700	0.000101156	up	KRH72690
GLYMA_02G228100	1.16e-19	down	KRH72704	Gma.15625
GLYMA_02G231100	6.83e-06	down	KRH72748	Gma.13703
GLYMA_02G232600	0.000115458	up	KRH72765	Gma.11203
GLYMA_02G234200	1.45e-19	up	KRH72792
GLYMA_02G237800	0.00344539	down	KRH72859	Gma.22504
GLYMA_02G238600	1.16e-19	down	KRH72878	Gma.42329
GLYMA_02G238800	0.000168831	up	KRH72888	Gma.59480
GLYMA_02G240200	0.00932509	down	KRH72912	Gma.12080
GLYMA_02G241000	1.16e-19	down	KRH72928	Gma.21031
GLYMA_02G241200	1.45e-19	up	KRH72931	Gma.28753
GLYMA_02G243400	3.95e-05	down	KRH72965
GLYMA_02G244600	1.45e-19	up	KRH72982
GLYMA_02G245300	6.83e-06	down	KRH72998
GLYMA_02G245700	1.45e-19	up	KRH73006
GLYMA_02G247000	2.39e-06	up	KRH73022
GLYMA_02G248900	0.00252611	up	KRH73051
GLYMA_02G249600	4.79e-05	down	KRH73060	Gma.59340
GLYMA_02G250200	0.000203798	down	KRH73067	Gma.59074
GLYMA_02G250700	1.16e-19	down	KRH73077
GLYMA_02G255100	0.000168831	up	KRH73161
GLYMA_02G255200	0.00479299	down	KRH73162
GLYMA_02G255400	1.45e-19	up	KRH73164	Gma.12224
GLYMA_02G256000	0.000399586	down	KRH73171
GLYMA_02G256800	0.00689925	down	KRH73185
GLYMA_02G257600	0.00188513	up	KRH73196
GLYMA_02G258600	1.89e-05	down	KRH73209
GLYMA_02G263200	0.000747029	up	KRH73264	Gma.30847
GLYMA_02G267900	6.83e-06	down	KRH73344
GLYMA_02G269000	1.07e-06	down	KRH73361	Gma.59329
GLYMA_02G269500	1.45e-19	up	KRH73375
GLYMA_02G269600	1.45e-19	up	KRH73377
GLYMA_02G269700	1.16e-19	down	KRH73378	Gma.1056
GLYMA_02G270200	0.000116297	down	KRH73385	Gma.5632
GLYMA_02G271400	1.16e-19	down	KRH73401	Gma.13103
GLYMA_02G272400	0.004414	down	KRH73425	Gma.13029
GLYMA_02G273400	0.000631023	down	KRH73436	Gma.61624
GLYMA_02G278300	0.000934531	down	KRH73527	Gma.7260
GLYMA_02G284900	1.22e-06	up	KRH73626	Gma.19908
GLYMA_02G288700	0.000898196	down	KRH73706
GLYMA_02G289400	0.000405647	down	KRH73716	Gma.20410
GLYMA_02G290200	1.09e-05	up	KRH73724
GLYMA_02G290300	0.000131332	up	KRH73725
GLYMA_02G290400	1.22e-06	up	KRH73729	Gma.26513
GLYMA_02G296600	1.22e-06	up	KRH73852	Gma.25509
GLYMA_02G303000	1.16e-19	down	KRH73948	Gma.4575
GLYMA_02G303200	0.000106317	down	KRH73950
GLYMA_02G303300	1.16e-19	down	KRH73951	Gma.63934
GLYMA_02G303700	0.00669088	up	KRH73962
GLYMA_02G305400	0.00177063	down	KRH74004	Gma.16943
GLYMA_02G305600	1.45e-19	up	KRH74006	Gma.59766
GLYMA_02G307300	1.45e-19	up	KRH74034
GLYMA_02G307700	1.16e-19	down	KRH74040	Gma.11161
GLYMA_02G308100	0.000174838	up	KRH74046	Gma.32252
GLYMA_02G308700	1.16e-19	down	KRH74053
GLYMA_02G309800	0.000215942	down	KRH74076
GLYMA_02G311200	1.45e-19	up	KRH74099
GLYMA_02G311900	1.16e-19	down	KRH74108	Gma.19289
GLYMA_03G001200	0.000341637	up	KRH64859
GLYMA_03G001500	1.45e-19	up	KRH64862	Gma.3639
GLYMA_03G002100	5.92e-06	down	KRH64875
GLYMA_03G004200	0.00667404	up	RCW19465
GLYMA_03G004300	1.45e-19	up	KRH64919	Gma.19501
GLYMA_03G005800	1.45e-19	up	KRH64948	Gma.27086
GLYMA_03G006900	0.00679403	up	KRH64963	Gma.30919
GLYMA_03G008400	4.95e-06	down	KRH64979
GLYMA_03G017600	0.00161304	down	KRH65165
GLYMA_03G017800	0.00904755	down	KRH65168
GLYMA_03G019700	1.16e-19	down	KRH65198
GLYMA_03G020700	0.00126378	down	KRH65209
GLYMA_03G024200	1.45e-19	up	KRH65275
GLYMA_03G024300	1.45e-19	up	KRH65276
GLYMA_03G024400	1.45e-19	up	KRH65277
GLYMA_03G027400	1.45e-19	up	KRH65317
GLYMA_03G027500	0.00263456	up	KRH65318
GLYMA_03G028000	1.16e-19	down	RCW19469
GLYMA_03G029900	1.2e-05	down	KRH65359	Gma.28794
GLYMA_03G030800	1.16e-19	down	KRH65368
GLYMA_03G040600	1.45e-19	up	KRH65501	Gma.30101
GLYMA_03G041000	1.45e-19	up	KRH65505
GLYMA_03G044500	1.45e-19	up	KRH65549
GLYMA_03G044900	1.45e-19	up	KRH65553
GLYMA_03G050100	1.16e-19	down	KRH65623	Gma.2505
GLYMA_03G056400	1.09e-05	up	KRH65710	Gma.6433
GLYMA_03G056700	1.16e-19	down	KRH65715	Gma.11043
GLYMA_03G057100	1.16e-19	down	KRH65722	Gma.17430
GLYMA_03G060100	3.2e-05	down	KRH65767	Gma.6724
GLYMA_03G062300	0.0013296	down	KRH65797
GLYMA_03G063000	0.000572193	down	KRH65809
GLYMA_03G063600	0.00131503	down	KRH65815
GLYMA_03G066600	1.22e-06	up	KRH65853	Gma.39306
GLYMA_03G068100	1.16e-19	down	KRH65878	Gma.1727
GLYMA_03G070500	0.00046567	down	KRH65921	Gma.26034
GLYMA_03G078000	0.00306254	down	KRH66029	Gma.18853
GLYMA_03G081900	1.16e-19	down	KRH66092	Gma.18698
GLYMA_03G084600	5.57e-05	up	KRH66126
GLYMA_03G085900	1.16e-19	down	KRH66143
GLYMA_03G086200	0.00328184	up	KRH66151	Gma.6719
GLYMA_03G086800	1.16e-19	down	KRH66158
GLYMA_03G090200	1.45e-19	up	KRH66206
GLYMA_03G090500	1.45e-19	up	KRH66209
GLYMA_03G091200	3.54e-06	up	KRH66217
GLYMA_03G092700	1.22e-06	up	KRH66238	Gma.18479
GLYMA_03G098900	1.16e-19	down	KRH66322	Gma.27458
GLYMA_03G101000	1.45e-19	up	KRH66358	Gma.20137
GLYMA_03G104700	1.45e-19	up	KRH66404	Gma.53594
GLYMA_03G105700	1.16e-19	down	KRH66428
GLYMA_03G107000	1.09e-05	up	KRH66443	Gma.16150
GLYMA_03G107900	1.45e-19	up	KRH66452
GLYMA_03G109900	1.45e-19	up	KRH66491	Gma.17765
GLYMA_03G115300	0.00762618	down	KRH66577
GLYMA_03G119500	1.16e-19	down	KRH66642	Gma.56779
GLYMA_03G120000	2.55e-05	down	KRH66649	Gma.58932
GLYMA_03G120800	4.42e-05	up	KRH66664	Gma.60616
GLYMA_03G120900	0.00946285	up	KRH66666	Gma.5843
GLYMA_03G122000	1.22e-06	up	KRH66683	Gma.5578
GLYMA_03G122100	1.16e-19	down	KRH66687
GLYMA_03G122500	1.16e-19	down	KRH66693
GLYMA_03G123100	0.00156548	down	KRH66699	Gma.16422
GLYMA_03G124400	1.16e-19	down	KRH66728	Gma.19362
GLYMA_03G125800	0.00263045	up	KRH66747	Gma.64290
GLYMA_03G126600	2.03e-05	down	KRH66758
GLYMA_03G127800	1.22e-06	up	KRH66773
GLYMA_03G128300	0.00343537	down	RCW19487	Gma.1390
GLYMA_03G128900	2.03e-05	down	KRH66792	Gma.60558
GLYMA_03G129300	1.45e-19	up	KRH66797	Gma.4249
GLYMA_03G130000	0.00691423	down	KRH66808	Gma.3911
GLYMA_03G130300	1.16e-19	down	KRH66811	Gma.59077
GLYMA_03G130900	0.00199581	down	KRH66817
GLYMA_03G132700	1.45e-19	up	KRH66846	Gma.31973
GLYMA_03G136000	1.45e-19	up	KRH66908
GLYMA_03G137000	1.16e-19	down	KRH66935	Gma.32268
GLYMA_03G142800	1.16e-19	down	KRH67036	Gma.3454
GLYMA_03G143200	9.47e-05	up	KRH67041	Gma.24906
GLYMA_03G143700	1.45e-19	up	KRH67050	Gma.29024
GLYMA_03G146000	1.07e-06	down	KRH67082	Gma.39067
GLYMA_03G146100	0.00496941	up	KRH67083
GLYMA_03G147900	1.45e-19	up	KRH67113	Gma.2773
GLYMA_03G148300	1.09e-05	up	KRH67123
GLYMA_03G150600	1.45e-19	up	KRH67153	Gma.57047
GLYMA_03G153800	0.000723822	down	KRH67206
GLYMA_03G155800	1.45e-19	up	KRH67235
GLYMA_03G156700	9.72e-05	down	KRH67253
GLYMA_03G157700	1.45e-19	up	KRH67272
GLYMA_03G158200	0.00726368	down	KRH67281	Gma.55956
GLYMA_03G159000	1.16e-19	down	KRH67294	Gma.24242
GLYMA_03G159400	1.16e-19	down	KRH67302
GLYMA_03G161600	1.45e-19	up	KRH67350
GLYMA_03G162800	1.45e-19	up	KRH67373	Gma.2372
GLYMA_03G164300	2.03e-05	down	KRH67405
GLYMA_03G164400	0.000806397	up	KRH67412	Gma.787
GLYMA_03G164500	1.22e-06	up	KRH67415	Gma.15915
GLYMA_03G170300	3.06e-06	down	KRH67520
GLYMA_03G171100	0.00816968	up	KRH67530	Gma.33289
GLYMA_03G172300	9.38e-05	up	KRH67547
GLYMA_03G172900	1.16e-19	down	KRH67559
GLYMA_03G173700	1.45e-19	up	KRH67570
GLYMA_03G176100	0.00746978	down	KRH67612
GLYMA_03G179800	1.45e-19	up	KRH67674
GLYMA_03G179900	1.16e-19	down	KRH67675
GLYMA_03G180900	1.16e-19	down	KRH67688
GLYMA_03G181600	1.45e-19	up	KRH67700	Gma.61580
GLYMA_03G181700	1.45e-19	up	KRH67701	Gma.61580
GLYMA_03G181800	1.16e-19	down	KRH67703
GLYMA_03G183600	0.000307148	down	KRH67730
GLYMA_03G184200	0.00781034	down	KRH67738
GLYMA_03G186500	1.45e-19	up	KRH67775
GLYMA_03G187000	1.16e-19	down	KRH67781	Gma.24590
GLYMA_03G187700	1.45e-19	up	KRH67788	Gma.26564
GLYMA_03G190200	1.16e-19	down	KRH67833
GLYMA_03G190900	4.51e-05	up	KRH67845
GLYMA_03G192300	0.00322254	down	KRH67872
GLYMA_03G193100	0.0012602	up	KRH67884	Gma.22320
GLYMA_03G196500	1.45e-19	up	KRH67929
GLYMA_03G198500	7.35e-05	up	KRH67959	Gma.36194
GLYMA_03G199100	0.00114696	up	KRH67966
GLYMA_03G201000	1.45e-19	up	KRH67991	Gma.11004
GLYMA_03G201100	1.45e-19	up	KRH67992	Gma.57496
GLYMA_03G202000	0.000136157	down	KRH68004	Gma.568
GLYMA_03G202400	0.000198092	down	KRH68010	Gma.20979
GLYMA_03G203000	1.45e-19	up	KRH68018	Gma.3584
GLYMA_03G207500	3.54e-06	up	KRH68086	Gma.11048
GLYMA_03G210100	1.16e-19	down	KRH68125	Gma.56398
GLYMA_03G212600	4.64e-05	down	KRH68161
GLYMA_03G212900	0.000228386	down	KRH68166
GLYMA_03G213500	0.00396219	up	KRH68172
GLYMA_03G214300	0.000203933	down	KRH68185	Gma.9702
GLYMA_03G214600	1.16e-19	down	KRH68192
GLYMA_03G217300	0.00637143	up	KRH68232	Gma.56651
GLYMA_03G217600	0.000172003	down	KRH68235
GLYMA_03G218300	1.45e-19	up	KRH68242	Gma.2546
GLYMA_03G218600	1.16e-19	down	KRH68246	Gma.5000
GLYMA_03G220800	1.45e-19	up	KRH68280	Gma.16547
GLYMA_03G223700	1.16e-19	down	KRH68330
GLYMA_03G224700	8.82e-06	up	KRH68344
GLYMA_03G225300	0.000352694	down	KRH68351	Gma.27850
GLYMA_03G226000	1.16e-19	down	KRH68364	Gma.32200
GLYMA_03G226600	6.46e-05	down	KRH68372	Gma.59639
GLYMA_03G227400	1.45e-19	up	KRH68383	Gma.2470
GLYMA_03G227500	1.16e-19	down	KRH68384
GLYMA_03G228900	1.45e-19	up	KRH68406	Gma.11135
GLYMA_03G230300	1.16e-19	down	KRH68425
GLYMA_03G230600	0.00150492	down	KRH68428	Gma.10648
GLYMA_03G234300	0.00697523	up	KRH68486	Gma.53102
GLYMA_03G234600	0.00275954	up	KRH68491	Gma.54637
GLYMA_03G234900	0.00232121	up	RCW19497
GLYMA_03G235000	0.000544983	up	KRH68498	Gma.18181
GLYMA_03G239000	0.0041857	up	KRH68575	Gma.20270
GLYMA_03G241000	0.000954604	down	KRH68606
GLYMA_03G241100	1.45e-19	up	KRH68609	Gma.17941
GLYMA_03G241500	1.45e-19	up	KRH68617
GLYMA_03G242600	0.000241348	up	KRH68641	Gma.55040
GLYMA_03G244400	1.16e-19	down	KRH68680
GLYMA_03G245100	0.00267949	down	KRH68704	Gma.6894
GLYMA_03G246700	1.45e-19	up	KRH68728
GLYMA_03G246900	1.45e-19	up	KRH68730	Gma.52399
GLYMA_03G247100	0.00206874	down	KRH68733	Gma.5483
GLYMA_03G247500	1.45e-19	up	KRH68739	Gma.30458
GLYMA_03G248000	0.00012262	down	KRH68748	Gma.8751
GLYMA_03G249500	0.00299848	up	KRH68773
GLYMA_03G249900	0.00218505	down	KRH68777
GLYMA_03G251400	0.00797067	up	KRH68799	Gma.1263
GLYMA_03G251600	1.45e-19	up	KRH68802
GLYMA_03G251900	1.54e-05	down	KRH68810
GLYMA_03G256700	1.45e-19	up	KRH68902	Gma.27516
GLYMA_03G258900	0.000723822	down	KRH68934	Gma.55739
GLYMA_03G259400	1.97e-05	down	KRH68940
GLYMA_03G259500	0.000191317	down	KRH68941
GLYMA_03G261500	1.16e-19	down	KRH68970	Gma.11189
GLYMA_03G261800	1.16e-19	down	KRH68976	Gma.17038
GLYMA_03G262300	0.00100383	down	KRH68993	Gma.25294
GLYMA_03G263000	1.45e-19	up	KRH69010
GLYMA_03G264300	0.00168974	up	KRH69027
GLYMA_04G001500	1.16e-19	down	KRH60638	Gma.26763
GLYMA_04G003200	1.16e-19	down	KRH60692	Gma.5998
GLYMA_04G003700	3.03e-05	down	KRH60697
GLYMA_04G007300	1.45e-19	up	KRH60750	Gma.47
GLYMA_04G007700	2.53e-05	up	KRH60755
GLYMA_04G008600	0.000636752	up	KRH60775	Gma.26952
GLYMA_04G008900	0.000121813	up	KRH60782
GLYMA_04G010300	1.16e-19	down	KRH60802	Gma.33842
GLYMA_04G012500	2.03e-05	down	KRH60837
GLYMA_04G013500	0.00230473	down	RCW19426
GLYMA_04G014500	2.03e-05	down	KRH60875	Gma.16594
GLYMA_04G014800	1.16e-19	down	KRH60879	Gma.4265
GLYMA_04G017400	0.000355245	down	KRH60928
GLYMA_04G018100	7.97e-06	up	KRH60946
GLYMA_04G018400	0.00035824	down	KRH60951
GLYMA_04G020000	1.16e-19	down	KRH60971
GLYMA_04G021200	1.16e-19	down	KRH60998
GLYMA_04G022300	2.89e-05	up	KRH61013
GLYMA_04G022900	1.16e-19	down	KRH61020
GLYMA_04G023200	0.00494461	up	KRH61023	Gma.19521
GLYMA_04G023500	1.16e-19	down	KRH61028
GLYMA_04G023700	1.16e-19	down	KRH61030
GLYMA_04G023900	1.16e-19	down	KRH61035	Gma.56259
GLYMA_04G025000	1.16e-19	down	KRH61052
GLYMA_04G025400	8.53e-05	down	KRH61058
GLYMA_04G032000	1.16e-19	down	KRH61173
GLYMA_04G032800	3.54e-06	up	KRH61187	Gma.19969
GLYMA_04G033500	1.16e-19	down	KRH61195
GLYMA_04G034000	0.00678762	down	KRH61206	Gma.42899
GLYMA_04G035100	1.45e-19	up	KRH61219
GLYMA_04G035500	1.45e-19	up	KRH61224
GLYMA_04G038800	0.00033927	up	KRH61287
GLYMA_04G040300	1.45e-19	up	KRH61320	Gma.17929
GLYMA_04G042400	1.45e-19	up	KRH61352
GLYMA_04G042900	0.000840777	down	KRH61359	Gma.52510
GLYMA_04G044500	0.000478714	up	KRH61385
GLYMA_04G044900	1.45e-19	up	KRH61394
GLYMA_04G050100	0.005461	down	KRH61486
GLYMA_04G050300	1.16e-19	down	KRH61490	Gma.54696
GLYMA_04G050400	1.45e-19	up	KRH61491	Gma.1824
GLYMA_04G052300	0.000468641	up	KRH61523
GLYMA_04G054100	1.16e-19	down	KRH61556	Gma.55005
GLYMA_04G057800	1.16e-19	down	KRH61616	Gma.22745
GLYMA_04G058900	0.00209481	down	KRH61628	Gma.54911
GLYMA_04G061500	0.000577051	down	KRH61670
GLYMA_04G061900	1.45e-19	up	KRH61684	Gma.55770
GLYMA_04G063700	1.11e-05	down	KRH61708
GLYMA_04G063800	1.16e-19	down	KRH61709
GLYMA_04G064100	3.86e-05	up	KRH61712
GLYMA_04G065600	1.16e-19	down	KRH61746	Gma.27312
GLYMA_04G067900	0.00724354	down	KRH61787	Gma.32433
GLYMA_04G074500	0.00254094	down	KRH61918
GLYMA_04G075700	1.16e-19	down	KRH61941
GLYMA_04G076300	0.000813758	up	KRH61947	Gma.27626
GLYMA_04G077900	0.00702235	down	KRH61971	Gma.19048
GLYMA_04G079600	1.16e-19	down	KRH62004	Gma.11263
GLYMA_04G080300	4.33e-05	up	KRH62017
GLYMA_04G080500	1.45e-19	up	KRH62022
GLYMA_04G082700	1.16e-19	down	KRH62051
GLYMA_04G086300	1.45e-19	up	KRH62100
GLYMA_04G088500	1.16e-19	down	KRH62139	Gma.50935
GLYMA_04G089700	1.45e-19	up	KRH62155
GLYMA_04G091600	1.22e-06	up	KRH62181
GLYMA_04G095200	0.00944416	down	KRH62237	Gma.21486
GLYMA_04G097500	1.16e-19	down	KRH62277
GLYMA_04G098100	1.22e-06	up	KRH62285
GLYMA_04G099400	8.6e-06	down	KRH62307
GLYMA_04G100300	1.45e-19	up	KRH62323
GLYMA_04G100400	1.16e-19	down	KRH62324
GLYMA_04G102800	1.45e-19	up	KRH62357
GLYMA_04G104200	1.16e-19	down	KRH62378	Gma.1619
GLYMA_04G104300	0.000484375	up	KRH62380
GLYMA_04G104600	5.61e-05	down	KRH62387	Gma.34392
GLYMA_04G107500	1.45e-19	up	KRH62422	Gma.16720
GLYMA_04G107900	8.6e-06	down	KRH62427	Gma.55488
GLYMA_04G117800	0.00275276	down	KRH62591	Gma.25114
GLYMA_04G118700	1.16e-19	down	KRH62602	Gma.28730
GLYMA_04G121100	0.0016144	up	KRH62636
GLYMA_04G136000	1.16e-19	down	KRH62837
GLYMA_04G139400	0.000130699	down	KRH62878
GLYMA_04G142800	8.6e-06	down	KRH62929
GLYMA_04G144600	0.00216031	up	KRH62958
GLYMA_04G147000	1.45e-19	up	KRH62989
GLYMA_04G147100	2.03e-05	down	KRH62990
GLYMA_04G150600	7.72e-05	down	KRH63033
GLYMA_04G153400	1.16e-19	down	KRH63073
GLYMA_04G156200	1.16e-19	down	KRH63128
GLYMA_04G158100	0.00424489	down	KRH63155	Gma.61854
GLYMA_04G158800	1.2e-05	down	KRH63162	Gma.25807
GLYMA_04G161000	1.16e-19	down	KRH63201
GLYMA_04G164400	0.00617108	up	KRH63265	Gma.55943
GLYMA_04G167900	7.54e-05	down	KRH63318	Gma.18151
GLYMA_04G168300	1.16e-19	down	KRH63324
GLYMA_04G169600	1.16e-19	down	KRH63343	Gma.28790
GLYMA_04G170400	0.000413005	up	KRH63352
GLYMA_04G171700	0.000184162	up	KRH63372	Gma.56423
GLYMA_04G173200	5.75e-06	up	KRH63394
GLYMA_04G174400	1.16e-19	down	KRH63407
GLYMA_04G176400	8.82e-06	up	RCW19445
GLYMA_04G177900	1.45e-19	up	KRH63457	Gma.8046
GLYMA_04G178500	1.45e-19	up	KRH63465
GLYMA_04G180000	1.54e-05	down	KRH63481
GLYMA_04G180400	1.45e-19	up	KRH63492
GLYMA_04G180800	1.16e-19	down	KRH63497	Gma.15930
GLYMA_04G181500	1.16e-19	down	KRH63511
GLYMA_04G183300	0.000911784	down	KRH63533
GLYMA_04G184900	0.0066492	down	KRH63557	Gma.22406
GLYMA_04G186300	1.16e-19	down	KRH63593
GLYMA_04G188700	0.000129278	down	KRH63638	Gma.23178
GLYMA_04G190400	1.45e-19	up	KRH63666	Gma.59249
GLYMA_04G194100	4.51e-05	up	KRH63732
GLYMA_04G194200	1.16e-19	down	RCW19449
GLYMA_04G198600	1.11e-05	down	RCW19452
GLYMA_04G199400	5.92e-06	down	KRH63834	Gma.1672
GLYMA_04G202100	0.000513167	down	KRH63881
GLYMA_04G202300	1.16e-19	down	KRH63883	Gma.11803
GLYMA_04G202500	1.16e-19	down	KRH63890	Gma.13283
GLYMA_04G202900	1.45e-19	up	KRH63897	Gma.27597
GLYMA_04G203100	1.45e-19	up	KRH63900
GLYMA_04G203300	1.45e-19	up	KRH63903
GLYMA_04G203600	5.75e-06	up	KRH63909
GLYMA_04G207200	1.16e-19	down	KRH63959
GLYMA_04G208300	1.45e-19	up	KRH63977	Gma.27062
GLYMA_04G209700	0.000259972	down	KRH63997
GLYMA_04G215800	0.00168027	down	KRH64093	Gma.32055
GLYMA_04G218900	0.000112817	down	KRH64142	Gma.16474
GLYMA_04G220600	1.45e-19	up	KRH64171
GLYMA_04G221700	1.16e-19	down	KRH64197	Gma.23162
GLYMA_04G223300	1.45e-19	up	KRH64216	Gma.38222
GLYMA_04G223700	1.45e-19	up	KRH64222	Gma.17305
GLYMA_04G224700	1.16e-19	down	KRH64245
GLYMA_04G225500	1.16e-19	down	KRH64261	Gma.15811
GLYMA_04G227700	0.00131293	down	KRH64288	Gma.54887
GLYMA_04G228300	0.000152336	up	KRH64297
GLYMA_04G228400	0.000548257	down	KRH64302	Gma.56070
GLYMA_04G229000	4.66e-06	up	KRH64309	Gma.58650
GLYMA_04G230000	1.45e-19	up	KRH64322	Gma.3322
GLYMA_04G230400	1.45e-19	up	KRH64326
GLYMA_04G232200	1.45e-19	up	KRH64363	Gma.13446
GLYMA_04G232400	1.16e-19	down	KRH64367	Gma.2446
GLYMA_04G233900	1.16e-19	down	KRH64398
GLYMA_04G235900	0.000992337	down	KRH64445
GLYMA_04G236100	0.00132169	up	KRH64456
GLYMA_04G236900	0.00208836	down	KRH64471
GLYMA_04G239000	1.22e-06	up	KRH64514
GLYMA_04G240000	0.000364903	down	KRH64529	Gma.58594
GLYMA_04G240800	1.16e-19	down	KRH64550	Gma.4097
GLYMA_04G241000	1.16e-19	down	KRH64552	Gma.8197
GLYMA_04G242000	1.16e-19	down	KRH64566	Gma.56906
GLYMA_04G243000	1.16e-19	down	KRH64579	Gma.56076
GLYMA_04G243500	0.00122367	up	KRH64587	Gma.29278
GLYMA_04G243800	1.16e-19	down	KRH64590
GLYMA_04G245000	1.45e-19	up	KRH64604	Gma.28330
GLYMA_04G245900	1.16e-19	down	KRH64615	Gma.56392
GLYMA_04G247900	1.45e-19	up	KRH64646	Gma.10984
GLYMA_04G249400	1.16e-19	down	KRH64672	Gma.13107
GLYMA_04G249700	2.08e-06	down	KRH64677	Gma.14976
GLYMA_04G251000	1.16e-19	down	KRH64701	Gma.25900
GLYMA_04G252600	0.000627892	down	KRH64726	Gma.20409
GLYMA_04G254100	0.000354352	up	KRH64755	Gma.55941
GLYMA_04G254300	0.000184035	down	KRH64758
GLYMA_04G255800	1.16e-19	down	KRH64803
GLYMA_05G002000	0.0025736	down	KRH56522
GLYMA_05G002200	1.45e-19	up	KRH56524
GLYMA_05G002500	1.16e-19	down	KRH56527	Gma.14335
GLYMA_05G003200	1.16e-19	down	KRH56536	Gma.33278
GLYMA_05G003900	1.16e-19	down	KRH56550
GLYMA_05G007200	0.00855896	down	KRH56606
GLYMA_05G010500	1.22e-06	up	KRH56646	Gma.52405
GLYMA_05G011200	1.16e-19	down	KRH56655	Gma.921
GLYMA_05G011900	1.16e-19	down	KRH56669
GLYMA_05G014300	1.16e-19	down	KRH56705
GLYMA_05G016000	1.16e-19	down	KRH56727	Gma.2329
GLYMA_05G018100	2.03e-05	down	KRH56758
GLYMA_05G018800	7.97e-06	up	KRH56774
GLYMA_05G020300	6.23e-05	up	KRH56803	Gma.17674
GLYMA_05G020900	0.00040388	up	KRH56814	Gma.12351
GLYMA_05G021500	1.16e-19	down	KRH56822	Gma.10997
GLYMA_05G022900	0.000133333	down	KRH56852	Gma.11333
GLYMA_05G023100	1.45e-19	up	KRH56857
GLYMA_05G026200	1.16e-19	down	KRH56906	Gma.1279
GLYMA_05G028000	0.00926813	up	KRH56926	Gma.5723
GLYMA_05G028600	0.00721911	down	KRH56935	Gma.969
GLYMA_05G031500	1.22e-06	up	KRH56984	Gma.25239
GLYMA_05G032200	1.07e-06	down	KRH56996	Gma.593
GLYMA_05G035000	0.00637929	down	KRH57032	Gma.58695
GLYMA_05G037700	1.45e-19	up	KRH57070
GLYMA_05G040900	0.00065273	up	KRH57125	Gma.54993
GLYMA_05G044000	1.16e-19	down	KRH57176	Gma.55258
GLYMA_05G044600	1.16e-19	down	KRH57186	Gma.63489
GLYMA_05G046400	1.45e-19	up	KRH57211	Gma.23520
GLYMA_05G047900	1.83e-05	up	KRH57229	Gma.20498
GLYMA_05G050100	1.16e-19	down	KRH57260	Gma.59114
GLYMA_05G052800	1.45e-19	up	KRH57302
GLYMA_05G055100	1.45e-19	up	KRH57337	Gma.30973
GLYMA_05G055500	0.00157518	down	KRH57341	Gma.2883
GLYMA_05G056000	1.16e-19	down	KRH57347	Gma.1920
GLYMA_05G056100	1.16e-19	down	KRH57349	Gma.6152
GLYMA_05G056300	1.16e-19	down	KRH57353
GLYMA_05G058100	1.45e-19	up	KRH57382	Gma.13021
GLYMA_05G066100	1.54e-05	down	KRH57521	Gma.32167
GLYMA_05G066500	0.00520054	down	KRH57527
GLYMA_05G070000	0.000792834	down	KRH57576	Gma.31891
GLYMA_05G073800	0.000345965	down	KRH57631
GLYMA_05G079100	0.000977556	up	KRH57706	Gma.3167
GLYMA_05G081300	1.45e-19	up	KRH57744
GLYMA_05G085400	0.00453901	down	KRH57809
GLYMA_05G087100	1.83e-05	up	KRH57831
GLYMA_05G090600	1.16e-19	down	KRH57891
GLYMA_05G091600	4.17e-05	down	KRH57902
GLYMA_05G097100	0.00441912	up	KRH57971
GLYMA_05G098200	0.00241177	down	KRH57983	Gma.59019
GLYMA_05G101700	3.54e-06	up	KRH58028
GLYMA_05G102100	1.16e-19	down	KRH58033
GLYMA_05G102800	0.00257618	down	KRH58040
GLYMA_05G103600	1.45e-19	up	KRH58057	Gma.30853
GLYMA_05G104400	0.00250308	up	KRH58071	Gma.14044
GLYMA_05G105000	0.00106776	down	KRH58085
GLYMA_05G109500	0.00893016	down	KRH58171
GLYMA_05G110000	8.6e-06	down	KRH58178
GLYMA_05G110400	1.07e-06	down	KRH58184	Gma.34276
GLYMA_05G112200	1.16e-19	down	KRH58208	Gma.7415
GLYMA_05G119100	0.000232759	down	KRH58297	Gma.56837
GLYMA_05G120700	6.15e-05	up	KRH58331	Gma.30915
GLYMA_05G126000	0.00243218	down	KRH58403	Gma.56956
GLYMA_05G128000	4.95e-06	down	KRH58441	Gma.12947
GLYMA_05G128500	1.93e-05	up	KRH58446
GLYMA_05G128700	0.00221601	up	KRH58449
GLYMA_05G128800	1.83e-05	up	KRH58450
GLYMA_05G129100	1.16e-19	down	KRH58453	Gma.3062
GLYMA_05G129200	1.45e-19	up	KRH58454
GLYMA_05G133700	1.45e-19	up	KRH58529	Gma.2596
GLYMA_05G138700	8.82e-06	up	KRH58608	Gma.55165
GLYMA_05G139000	0.00253774	down	KRH58613
GLYMA_05G139800	0.00251817	down	KRH58628	Gma.12514
GLYMA_05G139900	1.22e-06	up	KRH58630	Gma.1890
GLYMA_05G146800	1.45e-19	up	KRH58763	Gma.55064
GLYMA_05G147100	1.45e-19	up	KRH58768
GLYMA_05G151400	1.09e-05	up	KRH58841	Gma.11076
GLYMA_05G152200	1.16e-19	down	KRH58852
GLYMA_05G152300	1.46e-05	down	KRH58854
GLYMA_05G154600	1.16e-19	down	KRH58893	Gma.54901
GLYMA_05G156100	1.45e-19	up	KRH58920	Gma.54893
GLYMA_05G156300	1.16e-19	down	KRH58922	Gma.1759
GLYMA_05G158300	0.00082048	down	KRH58965
GLYMA_05G158700	0.00714543	down	KRH58970
GLYMA_05G160800	5.75e-06	up	KRH59007
GLYMA_05G161600	1.45e-19	up	KRH59021	Gma.2433
GLYMA_05G165100	1.16e-19	down	KRH59091
GLYMA_05G166800	1.16e-19	down	KRH59125
GLYMA_05G172300	0.000590546	down	KRH59223	Gma.31724
GLYMA_05G173400	1.16e-19	down	KRH59242
GLYMA_05G174200	3.06e-06	down	KRH59255
GLYMA_05G175400	0.00446588	up	KRH59281
GLYMA_05G177000	0.00372097	down	KRH59310
GLYMA_05G178200	1.45e-19	up	KRH59333
GLYMA_05G180100	1.45e-19	up	KRH59378
GLYMA_05G180600	4.86e-05	down	KRH59389	Gma.59135
GLYMA_05G181000	0.00045359	up	KRH59396	Gma.58821
GLYMA_05G181600	0.00133313	down	KRH59403
GLYMA_05G182600	8.83e-05	up	KRH59428
GLYMA_05G183100	1.16e-19	down	KRH59434
GLYMA_05G185200	0.000202634	down	KRH59474
GLYMA_05G187300	1.16e-19	down	KRH59510
GLYMA_05G188200	1.16e-19	down	KRH59526
GLYMA_05G188500	3.06e-06	down	KRH59531
GLYMA_05G191900	1.37e-05	down	KRH59576	Gma.13199
GLYMA_05G192700	1.16e-19	down	KRH59586
GLYMA_05G194000	0.00668068	up	KRH59602
GLYMA_05G195000	1.45e-19	up	KRH59618	Gma.30424
GLYMA_05G195400	6.07e-05	down	KRH59628
GLYMA_05G196800	0.00169555	up	KRH59658
GLYMA_05G197000	1.45e-19	up	KRH59665
GLYMA_05G197400	1.45e-19	up	KRH59676	Gma.59445
GLYMA_05G198700	0.000614466	down	KRH59706	Gma.59287
GLYMA_05G199100	1.45e-19	up	KRH59715
GLYMA_05G199200	0.000119772	up	KRH59716	Gma.2369
GLYMA_05G200500	1.16e-19	down	KRH59739
GLYMA_05G201300	1.16e-19	down	KRH59759	Gma.32110
GLYMA_05G202000	0.000235294	down	KRH59776
GLYMA_05G203700	1.11e-05	down	KRH59801	Gma.16385
GLYMA_05G208400	1.45e-19	up	KRH59911	Gma.61947
GLYMA_05G208700	1.16e-19	down	KRH59918	Gma.64203
GLYMA_05G209100	2.39e-06	up	KRH59922	Gma.758
GLYMA_05G209900	0.0021472	up	KRH59946
GLYMA_05G210900	1.16e-19	down	KRH59960
GLYMA_05G211000	0.00783864	down	KRH59962
GLYMA_05G211800	0.0010058	up	KRH59971
GLYMA_05G213200	0.00892587	up	KRH59993
GLYMA_05G215900	1.45e-19	up	KRH60029
GLYMA_05G216000	1.16e-19	down	KRH60030
GLYMA_05G216400	1.16e-19	down	KRH60035	Gma.5785
GLYMA_05G217000	0.00108739	up	KRH60044
GLYMA_05G218400	1.16e-19	down	KRH60067	Gma.23790
GLYMA_05G218500	8.82e-06	up	KRH60068	Gma.10950
GLYMA_05G219400	1.45e-19	up	KRH60086
GLYMA_05G219800	1.45e-19	up	KRH60094	Gma.136
GLYMA_05G224400	1.16e-19	down	KRH60170	Gma.55583
GLYMA_05G224500	1.16e-19	down	KRH60171
GLYMA_05G227400	1.45e-19	up	KRH60220
GLYMA_05G230700	7.59e-05	down	KRH60280
GLYMA_05G232200	1.83e-05	up	KRH60300
GLYMA_05G235800	3.27e-05	down	KRH60371	Gma.30456
GLYMA_05G236300	8.82e-06	up	KRH60380	Gma.33382
GLYMA_05G236600	0.000392116	down	KRH60383	Gma.31645
GLYMA_05G237100	1.45e-19	up	KRH60389
GLYMA_05G237200	1.45e-19	up	KRH60390
GLYMA_05G239400	0.000505747	down	KRH60424
GLYMA_05G241100	2.32e-05	up	KRH60449	Gma.5220
GLYMA_05G241600	1.16e-19	down	KRH60458
GLYMA_05G241900	0.000184035	down	KRH60461
GLYMA_05G243200	0.00126863	down	KRH60483	Gma.7335
GLYMA_05G243300	1.16e-19	down	KRH60484
GLYMA_05G245800	0.00377722	down	KRH60532	Gma.11336
GLYMA_05G246700	0.00152412	up	KRH60548
GLYMA_05G247300	8.6e-06	down	KRH60559	Gma.19243
GLYMA_05G247800	0.00146671	down	KRH60572	Gma.24929
GLYMA_06G001500	0.000886525	down	KRH51352
GLYMA_06G001600	0.000548257	down	RCW19358
GLYMA_06G002300	0.0013932	up	KRH51363	Gma.28802
GLYMA_06G010200	2.89e-05	up	KRH51497
GLYMA_06G010300	2.89e-05	up	KRH51498
GLYMA_06G011700	1.16e-19	down	KRH51516
GLYMA_06G011800	1.16e-19	down	KRH51517
GLYMA_06G012200	1.16e-19	down	KRH51522	Gma.63271
GLYMA_06G014500	3.95e-05	down	KRH51556	Gma.57987
GLYMA_06G017800	0.00441313	down	KRH51608
GLYMA_06G021200	1.11e-05	down	KRH51662	Gma.57258
GLYMA_06G023100	0.00318491	up	KRH51685
GLYMA_06G023400	1.16e-19	down	KRH51689	Gma.17467
GLYMA_06G024000	1.45e-19	up	KRH51700	Gma.63966
GLYMA_06G024100	1.16e-19	down	KRH51701	Gma.5666
GLYMA_06G024200	7.77e-06	down	KRH51702
GLYMA_06G025100	1.16e-19	down	KRH51715	Gma.59507
GLYMA_06G025200	1.16e-19	down	KRH51718
GLYMA_06G028000	1.22e-06	up	KRH51770
GLYMA_06G028500	0.000520216	down	KRH51777
GLYMA_06G030500	1.16e-19	down	KRH51830	Gma.51036
GLYMA_06G030900	1.16e-19	down	KRH51835
GLYMA_06G033700	1.16e-19	down	KRH51880
GLYMA_06G035000	1.45e-19	up	KRH51920
GLYMA_06G035300	0.000184035	down	KRH51923
GLYMA_06G035900	1.16e-19	down	KRH51929	Gma.52568
GLYMA_06G036400	1.45e-19	up	KRH51939
GLYMA_06G037000	1.45e-19	up	KRH51947	Gma.7853
GLYMA_06G039700	1.16e-19	down	KRH51991
GLYMA_06G039900	0.000557267	down	KRH51995	Gma.63269
GLYMA_06G044400	1.16e-19	down	KRH52061	Gma.3433
GLYMA_06G045400	1.45e-19	up	KRH52082	Gma.39016
GLYMA_06G047400	0.00472149	down	KRH52116	Gma.36524
GLYMA_06G047600	1.22e-06	up	KRH52122	Gma.4449
GLYMA_06G047700	0.00510604	down	KRH52123
GLYMA_06G048300	0.00192887	down	KRH52129
GLYMA_06G050100	1.45e-19	up	KRH52162	Gma.3405
GLYMA_06G050300	1.16e-19	down	KRH52166	Gma.4156
GLYMA_06G050500	1.16e-19	down	KRH52168
GLYMA_06G052000	0.00387463	up	KRH52196
GLYMA_06G055900	1.11e-05	down	KRH52246
GLYMA_06G056000	1.16e-19	down	KRH52249	Gma.56746
GLYMA_06G058500	1.16e-19	down	KRH52284
GLYMA_06G059600	2.08e-06	down	KRH52295	Gma.16857
GLYMA_06G062900	1.45e-19	up	KRH52351	Gma.4549
GLYMA_06G065200	1.22e-06	up	KRH52385
GLYMA_06G067000	1.16e-19	down	KRH52413
GLYMA_06G068100	1.22e-06	up	KRH52432
GLYMA_06G069300	5.48e-05	up	KRH52456	Gma.62530
GLYMA_06G072000	1.45e-19	up	KRH52506
GLYMA_06G074300	3.74e-05	down	KRH52539	Gma.10888
GLYMA_06G077200	8.16e-05	down	KRH52604
GLYMA_06G078100	0.00653348	down	KRH52616
GLYMA_06G078400	5.02e-05	down	KRH52622	Gma.1970
GLYMA_06G081100	1.16e-19	down	KRH52659	Gma.51668
GLYMA_06G082400	0.000609966	up	KRH52683	Gma.3139
GLYMA_06G082800	2.08e-06	down	KRH52689
GLYMA_06G084200	1.16e-19	down	KRH52719	Gma.4462
GLYMA_06G086600	0.000203933	down	KRH52763
GLYMA_06G087800	1.45e-19	up	KRH52782
GLYMA_06G088300	0.000391343	up	KRH52799
GLYMA_06G089600	8.6e-05	down	KRH52829
GLYMA_06G089800	0.000848739	down	KRH52832	Gma.3194
GLYMA_06G090700	9.72e-05	down	KRH52853
GLYMA_06G095200	0.00794372	down	KRH52923
GLYMA_06G100200	1.97e-05	down	KRH53002	Gma.18830
GLYMA_06G100300	1.16e-19	down	KRH53003	Gma.20741
GLYMA_06G102000	1.45e-19	up	KRH53040	Gma.37327
GLYMA_06G102100	1.07e-06	down	KRH53041	Gma.4531
GLYMA_06G102700	0.000800649	down	KRH53053
GLYMA_06G105700	4.95e-06	down	KRH53113	Gma.25891
GLYMA_06G105800	7.77e-06	down	KRH53114	Gma.19957
GLYMA_06G106700	1.16e-19	down	KRH53129	Gma.26416
GLYMA_06G107200	0.00192459	up	KRH53137	Gma.18824
GLYMA_06G108100	1.45e-19	up	KRH53153
GLYMA_06G109200	1.16e-19	down	KRH53180	Gma.8416
GLYMA_06G112200	1.16e-19	down	KRH53223	Gma.4584
GLYMA_06G113200	2.03e-05	down	KRH53237	Gma.55217
GLYMA_06G116200	1.16e-19	down	KRH53280	Gma.36725
GLYMA_06G117200	1.16e-19	down	KRH53298	Gma.3668
GLYMA_06G119500	1.16e-19	down	KRH53332
GLYMA_06G120300	1.16e-19	down	KRH53344
GLYMA_06G120500	1.37e-05	down	KRH53347
GLYMA_06G121100	1.16e-19	down	KRH53361	Gma.31000
GLYMA_06G121300	0.000300709	down	KRH53364
GLYMA_06G122600	1.16e-19	down	KRH53387	Gma.54863
GLYMA_06G123200	1.16e-19	down	KRH53400
GLYMA_06G123800	1.45e-19	up	KRH53411	Gma.51680
GLYMA_06G124000	1.16e-19	down	KRH53414
GLYMA_06G124100	0.00251873	down	KRH53417
GLYMA_06G125800	1.16e-19	down	KRH53445	Gma.23563
GLYMA_06G126100	0.000185841	down	KRH53449	Gma.20914
GLYMA_06G127300	0.000106317	down	KRH53476	Gma.37278
GLYMA_06G127700	0.000225108	down	KRH53484
GLYMA_06G128700	1.16e-19	down	KRH53496	Gma.29754
GLYMA_06G132600	1.16e-19	down	KRH53564	Gma.2446
GLYMA_06G133700	4.41e-05	down	KRH53588
GLYMA_06G135100	3.54e-06	up	KRH53608
GLYMA_06G136000	1.45e-19	up	KRH53621
GLYMA_06G137100	8.82e-06	up	KRH53638	Gma.6550
GLYMA_06G137300	1.45e-19	up	KRH53640
GLYMA_06G140000	1.16e-19	down	KRH53686
GLYMA_06G141100	2.08e-06	down	KRH53702
GLYMA_06G141600	1.45e-19	up	KRH53712
GLYMA_06G142000	1.45e-19	up	KRH53716	Gma.9913
GLYMA_06G142900	1.16e-19	down	KRH53727	Gma.27767
GLYMA_06G143000	1.45e-19	up	KRH53728	Gma.8289
GLYMA_06G143800	4.95e-06	down	KRH53748
GLYMA_06G145700	1.07e-06	down	KRH53779	Gma.59090
GLYMA_06G146900	2.03e-05	down	KRH53802	Gma.62060
GLYMA_06G147100	1.45e-19	up	KRH53804	Gma.35193
GLYMA_06G150300	0.00766109	down	KRH53859	Gma.55177
GLYMA_06G153400	1.07e-06	down	KRH53898	Gma.30423
GLYMA_06G157400	1.45e-19	up	KRH53959	Gma.55396
GLYMA_06G158200	1.16e-19	down	KRH53972
GLYMA_06G158400	1.16e-19	down	KRH53976
GLYMA_06G159400	0.000455041	down	KRH53995
GLYMA_06G160200	1.16e-19	down	KRH54013	Gma.18167
GLYMA_06G161700	0.00440765	up	KRH54040
GLYMA_06G162400	1.45e-19	up	KRH54053	Gma.53208
GLYMA_06G162600	1.45e-19	up	KRH54059	Gma.31779
GLYMA_06G163500	0.000838083	down	KRH54082	Gma.4284
GLYMA_06G164800	1.45e-19	up	KRH54109
GLYMA_06G165700	1.16e-19	down	KRH54121
GLYMA_06G166800	2.08e-06	down	KRH54139	Gma.59879
GLYMA_06G168300	1.16e-19	down	KRH54159	Gma.56308
GLYMA_06G169400	0.00018384	down	KRH54175	Gma.10654
GLYMA_06G170300	1.16e-19	down	KRH54186	Gma.19354
GLYMA_06G171400	0.000399586	down	KRH54200	Gma.62970
GLYMA_06G172000	0.000168831	up	KRH54214
GLYMA_06G175100	1.45e-19	up	KRH54282	Gma.7470
GLYMA_06G175500	1.16e-19	down	KRH54286
GLYMA_06G176600	2.08e-06	down	KRH54301
GLYMA_06G177500	0.000517869	down	KRH54317
GLYMA_06G184800	1.16e-19	down	KRH54433	Gma.5554
GLYMA_06G185200	1.16e-19	down	KRH54441	Gma.19326
GLYMA_06G185300	1.16e-19	down	KRH54442
GLYMA_06G187400	1.45e-19	up	KRH54468	Gma.5600
GLYMA_06G187600	0.000116297	down	KRH54471	Gma.52135
GLYMA_06G189900	1.16e-19	down	KRH54497
GLYMA_06G190200	9.47e-06	down	KRH54501	Gma.31006
GLYMA_06G191200	1.16e-19	down	KRH54516
GLYMA_06G192200	0.000470844	up	KRH54532	Gma.30073
GLYMA_06G193200	8.1e-05	up	KRH54545	Gma.18178
GLYMA_06G193500	1.45e-19	up	KRH54548	Gma.2730
GLYMA_06G193800	1.16e-19	down	KRH54552	Gma.55476
GLYMA_06G194200	0.000328265	up	KRH54559
GLYMA_06G194800	1.16e-19	down	KRH54567
GLYMA_06G195200	0.00157309	down	KRH54572	Gma.1225
GLYMA_06G199000	0.00172932	down	KRH54624
GLYMA_06G206400	5.25e-05	down	KRH54755
GLYMA_06G209400	4.24e-05	up	KRH54795
GLYMA_06G210200	1.22e-06	up	KRH54804
GLYMA_06G211300	1.16e-19	down	KRH54817
GLYMA_06G214700	1.16e-19	down	KRH54861	Gma.25259
GLYMA_06G221300	7.54e-05	down	KRH54955
GLYMA_06G223700	0.004064	down	KRH54991
GLYMA_06G224200	1.2e-05	down	KRH54999	Gma.56540
GLYMA_06G230800	1.22e-06	up	KRH55104
GLYMA_06G235100	0.00037274	down	KRH55172	Gma.24396
GLYMA_06G239900	1.45e-19	up	KRH55245	Gma.24608
GLYMA_06G244900	1.45e-19	up	KRH55309	Gma.16918
GLYMA_06G247100	1.16e-19	down	KRH55334	Gma.2542
GLYMA_06G248900	1.45e-19	up	KRH55355	Gma.26856
GLYMA_06G249300	1.16e-19	down	KRH55359
GLYMA_06G255900	1.45e-19	up	KRH55442
GLYMA_06G260100	1.45e-19	up	KRH55514	Gma.19720
GLYMA_06G262700	1.45e-19	up	KRH55561
GLYMA_06G262800	0.00342768	down	KRH55562	Gma.55862
GLYMA_06G263300	0.000249642	down	KRH55575
GLYMA_06G265800	3.06e-06	down	KRH55605	Gma.26093
GLYMA_06G270500	0.000948143	down	KRH55664	Gma.27702
GLYMA_06G275500	7.67e-05	down	KRH55718	Gma.64255
GLYMA_06G276000	0.00822083	up	KRH55723
GLYMA_06G282200	1.16e-19	down	KRH55792
GLYMA_06G283400	1.16e-19	down	KRH55807
GLYMA_06G283600	1.16e-19	down	KRH55809
GLYMA_06G286100	0.00691915	up	KRH55854
GLYMA_06G290000	8.82e-06	up	KRH55920	Gma.31930
GLYMA_06G290200	1.45e-19	up	RCW19377
GLYMA_06G293200	0.00694462	down	KRH55966
GLYMA_06G293400	0.00180849	down	KRH55969	Gma.1968
GLYMA_06G295400	1.45e-19	up	KRH55998	Gma.3828
GLYMA_06G295500	1.16e-19	down	KRH55999
GLYMA_06G295700	1.16e-19	down	KRH56002	Gma.31656
GLYMA_06G296200	0.00251845	down	KRH56011
GLYMA_06G298400	1.16e-19	down	KRH56040
GLYMA_06G298600	1.16e-19	down	KRH56043	Gma.2290
GLYMA_06G303100	1.45e-19	up	KRH56099	Gma.36024
GLYMA_06G305000	0.00238634	down	KRH56122
GLYMA_06G305700	0.00353553	up	KRH56131
GLYMA_06G307000	1.16e-19	down	KRH56152	Gma.12731
GLYMA_06G307100	1.16e-19	down	KRH56153	Gma.27745
GLYMA_06G308500	1.45e-19	up	KRH56172
GLYMA_06G308800	1.45e-19	up	KRH56180
GLYMA_06G310100	1.45e-19	up	KRH56206	Gma.4222
GLYMA_06G313200	0.000363319	down	KRH56251
GLYMA_06G317800	1.45e-19	up	KRH56333
GLYMA_06G319300	2.32e-05	up	KRH56361	Gma.31795
GLYMA_06G319500	1.45e-19	up	KRH56363
GLYMA_06G320800	1.45e-19	up	KRH56380
GLYMA_06G324300	1.16e-19	down	KRH56457	Gma.2507
GLYMA_06G325100	1.11e-05	down	KRH56476
GLYMA_07G001300	1.16e-19	down	KRH46975	Gma.31324
GLYMA_07G004200	6.83e-06	down	KRH47018	Gma.2191
GLYMA_07G006900	1.16e-19	down	KRH47066	Gma.31690
GLYMA_07G007000	1.16e-19	down	KRH47068	Gma.2019
GLYMA_07G009100	0.00729984	down	KRH47108
GLYMA_07G010400	1.16e-19	down	KRH47126
GLYMA_07G011700	1.16e-19	down	KRH47150	Gma.23642
GLYMA_07G012800	1.45e-19	up	KRH47170	Gma.55044
GLYMA_07G014100	1.16e-19	down	KRH47190	Gma.31693
GLYMA_07G014300	0.00449725	down	KRH47193
GLYMA_07G014500	1.16e-19	down	KRH47195	Gma.30703
GLYMA_07G015800	2.39e-06	up	KRH47215	Gma.59420
GLYMA_07G018000	1.16e-19	down	KRH47241	Gma.11324
GLYMA_07G018500	0.00061829	down	KRH47256
GLYMA_07G019700	0.00451127	down	KRH47281	Gma.35833
GLYMA_07G020200	0.00973978	up	KRH47289
GLYMA_07G020400	0.00485503	down	KRH47291	Gma.26099
GLYMA_07G020900	1.97e-05	down	KRH47301	Gma.59234
GLYMA_07G021300	0.000123352	up	KRH47310	Gma.58800
GLYMA_07G021400	0.000813757	down	KRH47312	Gma.27004
GLYMA_07G021600	1.45e-19	up	KRH47315	Gma.59483
GLYMA_07G022000	8.96e-05	down	KRH47324	Gma.14246
GLYMA_07G022300	1.16e-19	down	KRH47328
GLYMA_07G023300	1.45e-19	up	KRH47344	Gma.31966
GLYMA_07G023500	3.27e-05	down	KRH47346
GLYMA_07G027400	1.16e-19	down	KRH47401	Gma.6638
GLYMA_07G028300	0.00260268	down	KRH47413	Gma.7102
GLYMA_07G028900	1.16e-19	down	KRH47425	Gma.32157
GLYMA_07G030300	0.00645415	down	KRH47444
GLYMA_07G031000	1.45e-19	up	KRH47457	Gma.58508
GLYMA_07G031700	1.45e-19	up	KRH47472	Gma.1691
GLYMA_07G032900	1.45e-19	up	KRH47500
GLYMA_07G034800	1.16e-19	down	KRH47522	Gma.31678
GLYMA_07G034900	1.16e-19	down	KRH47525	Gma.36108
GLYMA_07G035000	4.66e-06	up	KRH47527	Gma.59864
GLYMA_07G036200	0.000500339	down	KRH47555	Gma.30303
GLYMA_07G039500	8.82e-06	up	KRH47611
GLYMA_07G039800	1.09e-05	up	KRH47614	Gma.4374
GLYMA_07G041400	2.39e-06	up	KRH47640	Gma.15155
GLYMA_07G043100	1.45e-19	up	KRH47670	Gma.29570
GLYMA_07G043500	2.08e-06	down	KRH47678
GLYMA_07G043800	0.000264679	up	KRH47682	Gma.3328
GLYMA_07G045500	2.32e-05	up	KRH47711	Gma.5711
GLYMA_07G045900	1.22e-06	up	KRH47719
GLYMA_07G046000	1.07e-06	down	KRH47720
GLYMA_07G046800	0.000184638	down	KRH47730
GLYMA_07G047500	0.00183083	up	KRH47738
GLYMA_07G048500	0.000266192	down	KRH47759	Gma.17697
GLYMA_07G048900	1.45e-19	up	KRH47771	Gma.10216
GLYMA_07G049000	0.00754588	down	KRH47772	Gma.11282
GLYMA_07G049400	1.16e-19	down	KRH47788	Gma.50316
GLYMA_07G049500	1.16e-19	down	KRH47799
GLYMA_07G049900	1.16e-19	down	KRH47804	Gma.30481
GLYMA_07G050300	1.16e-19	down	KRH47815	Gma.31944
GLYMA_07G051400	0.000631023	down	KRH47833	Gma.37898
GLYMA_07G051500	1.16e-19	down	KRH47834
GLYMA_07G052100	0.000161169	down	KRH47840	Gma.20579
GLYMA_07G052300	1.16e-19	down	KRH47844
GLYMA_07G052400	0.00110206	up	KRH47846	Gma.55082
GLYMA_07G055000	0.000205968	down	KRH47897
GLYMA_07G057200	1.07e-06	down	KRH47932	Gma.2559
GLYMA_07G057700	1.07e-06	down	KRH47938
GLYMA_07G058200	0.00785968	down	KRH47948
GLYMA_07G059600	1.16e-19	down	KRH47967	Gma.13583
GLYMA_07G060300	0.00940984	up	KRH47978	Gma.56159
GLYMA_07G064900	1.45e-19	up	KRH48043
GLYMA_07G068300	1.16e-19	down	KRH48092	Gma.12390
GLYMA_07G069700	0.00141016	down	KRH48117	Gma.3011
GLYMA_07G072800	0.00011619	up	KRH48172	Gma.61514
GLYMA_07G073100	2.08e-06	down	KRH48177
GLYMA_07G073800	0.000252717	up	KRH48195	Gma.60964
GLYMA_07G074400	0.00011619	up	KRH48201	Gma.56625
GLYMA_07G075100	1.16e-19	down	KRH48212	Gma.30293
GLYMA_07G077400	3.06e-06	down	KRH48242
GLYMA_07G079500	9.47e-06	down	KRH48279
GLYMA_07G081600	1.16e-19	down	KRH48308
GLYMA_07G081900	4.11e-05	down	KRH48311
GLYMA_07G086500	0.00189324	down	KRH48399
GLYMA_07G088300	1.16e-19	down	KRH48427
GLYMA_07G089300	1.16e-19	down	KRH48451
GLYMA_07G089800	1.45e-19	up	KRH48459
GLYMA_07G090000	1.45e-19	up	KRH48461
GLYMA_07G090700	0.0006	down	KRH48469
GLYMA_07G095900	1.45e-19	up	KRH48542
GLYMA_07G096900	1.16e-19	down	KRH48559	Gma.13454
GLYMA_07G104500	1.45e-19	up	KRH48675
GLYMA_07G105700	8.82e-06	up	KRH48688
GLYMA_07G109200	1.45e-19	up	KRH48743
GLYMA_07G110900	0.00215558	down	KRH48763	Gma.28699
GLYMA_07G118000	1.45e-19	up	KRH48865
GLYMA_07G118600	5.57e-05	up	KRH48875	Gma.16150
GLYMA_07G125500	1.16e-19	down	KRH49001
GLYMA_07G126200	0.000378761	up	KRH49009	Gma.7301
GLYMA_07G126800	1.16e-19	down	KRH49023
GLYMA_07G127900	0.00203524	up	KRH49038	Gma.56576
GLYMA_07G129300	0.00450743	down	KRH49056	Gma.27651
GLYMA_07G131900	0.00226009	up	KRH49094	Gma.34878
GLYMA_07G132600	1.16e-19	down	KRH49103	Gma.60132
GLYMA_07G132900	1.45e-19	up	KRH49107
GLYMA_07G133500	0.000416896	down	KRH49121	Gma.5606
GLYMA_07G134500	1.16e-19	down	KRH49132	Gma.32169
GLYMA_07G135300	0.000198092	down	KRH49144	Gma.6051
GLYMA_07G137100	1.45e-19	up	KRH49169
GLYMA_07G137600	1.22e-06	up	KRH49180
GLYMA_07G138000	1.22e-06	up	KRH49185
GLYMA_07G139300	1.22e-06	up	KRH49208	Gma.15465
GLYMA_07G142000	1.45e-19	up	KRH49241
GLYMA_07G142700	2.03e-05	down	KRH49250	Gma.56375
GLYMA_07G143200	0.00420029	up	KRH49255	Gma.27043
GLYMA_07G148600	0.000455041	down	KRH49356
GLYMA_07G149600	1.16e-19	down	KRH49371	Gma.17516
GLYMA_07G150400	1.16e-19	down	KRH49384	Gma.15839
GLYMA_07G152900	0.000963394	up	KRH49417
GLYMA_07G158200	0.00210767	down	KRH49489
GLYMA_07G159600	0.00921766	up	KRH49503
GLYMA_07G162900	1.07e-06	down	KRH49556	Gma.28693
GLYMA_07G168500	1.45e-19	up	KRH49622	Gma.20518
GLYMA_07G168900	1.45e-19	up	KRH49629
GLYMA_07G173000	1.45e-19	up	KRH49695
GLYMA_07G180100	0.000318996	up	KRH49796	Gma.55641
GLYMA_07G183200	1.16e-19	down	KRH49847	Gma.55412
GLYMA_07G183600	7.97e-06	up	KRH49851	Gma.55666
GLYMA_07G184300	1.45e-19	up	KRH49859
GLYMA_07G184800	0.000626323	down	KRH49869	Gma.61165
GLYMA_07G189500	1.45e-19	up	KRH49937	Gma.59232
GLYMA_07G191400	1.45e-19	up	KRH49962
GLYMA_07G191900	1.45e-19	up	KRH49971
GLYMA_07G197600	8.75e-05	down	KRH50060
GLYMA_07G198900	0.00883118	down	KRH50083	Gma.28675
GLYMA_07G202300	1.45e-19	up	KRH50129	Gma.28709
GLYMA_07G208300	1.22e-06	up	KRH50216
GLYMA_07G208700	1.45e-19	up	KRH50224	Gma.52468
GLYMA_07G212000	0.00776697	up	KRH50269	Gma.19854
GLYMA_07G212800	1.16e-19	down	KRH50279	Gma.21340
GLYMA_07G212900	0.00119149	up	KRH50282
GLYMA_07G214700	1.45e-19	up	KRH50323	Gma.59461
GLYMA_07G215400	1.45e-19	up	KRH50339	Gma.56086
GLYMA_07G215900	1.16e-19	down	KRH50344	Gma.2475
GLYMA_07G222200	3.95e-05	down	KRH50435
GLYMA_07G222500	1.16e-19	down	KRH50467
GLYMA_07G222700	1.45e-19	up	KRH50469	Gma.5963
GLYMA_07G224400	1.97e-05	down	KRH50500
GLYMA_07G225500	0.00828967	up	KRH50515
GLYMA_07G228100	6.41e-05	up	KRH50555	Gma.6023
GLYMA_07G228300	2.08e-06	down	KRH50559
GLYMA_07G232000	7.54e-05	down	KRH50612	Gma.53304
GLYMA_07G233900	1.45e-19	up	KRH50641
GLYMA_07G237600	4.95e-06	down	KRH50696	Gma.15437
GLYMA_07G238300	1.16e-19	down	KRH50708
GLYMA_07G240800	0.000584277	down	KRH50746
GLYMA_07G240900	1.16e-19	down	KRH50747
GLYMA_07G241000	0.00105594	down	KRH50748	Gma.2537
GLYMA_07G241600	1.07e-06	down	KRH50756
GLYMA_07G242000	0.000461538	up	KRH50761
GLYMA_07G243100	1.16e-19	down	KRH50775
GLYMA_07G243900	1.45e-19	up	KRH50787	Gma.53181
GLYMA_07G244700	1.16e-19	down	KRH50800	Gma.23172
GLYMA_07G247500	0.0010369	down	KRH50846
GLYMA_07G248600	1.45e-19	up	KRH50867	Gma.30371
GLYMA_07G251000	4.66e-06	up	KRH50918
GLYMA_07G251200	0.00509086	down	KRH50920	Gma.764
GLYMA_07G251300	1.45e-19	up	KRH50922	Gma.10717
GLYMA_07G253700	9.38e-05	down	KRH50954
GLYMA_07G254700	1.45e-19	up	KRH50983
GLYMA_07G255400	1.97e-05	down	RCW19352
GLYMA_07G255500	0.000193934	up	KRH51002	Gma.58765
GLYMA_07G257500	2.08e-06	down	KRH51036	Gma.1289
GLYMA_07G257700	0.000330986	down	KRH51039	Gma.58855
GLYMA_07G258100	1.16e-19	down	KRH51045	Gma.2062
GLYMA_07G260300	1.16e-19	down	KRH51084	Gma.30052
GLYMA_07G261500	1.45e-19	up	KRH51108
GLYMA_07G262100	0.00383595	down	KRH51121	Gma.2009
GLYMA_07G263700	9.72e-05	down	KRH51141
GLYMA_07G265800	0.00408954	down	KRH51165
GLYMA_07G265900	0.000572478	down	KRH51167
GLYMA_07G266300	1.45e-19	up	KRH51172
GLYMA_07G269900	5.61e-05	down	KRH51229
GLYMA_07G273400	0.000228613	down	KRH51298	Gma.5181
GLYMA_07G273600	1.16e-19	down	KRH51301	Gma.27585
GLYMA_08G000800	1.16e-19	down	KRH40938
GLYMA_08G001600	4.24e-05	up	KRH40950
GLYMA_08G002000	0.000354352	up	KRH40958
GLYMA_08G003100	1.16e-19	down	KRH40977
GLYMA_08G004800	1.45e-19	up	KRH41010	Gma.8238
GLYMA_08G005200	5.91e-05	down	KRH41016
GLYMA_08G005900	0.00106214	down	KRH41028
GLYMA_08G006400	1.45e-19	up	KRH41040
GLYMA_08G006500	4.66e-06	up	KRH41041	Gma.60960
GLYMA_08G007900	1.16e-19	down	KRH41060
GLYMA_08G010600	2.39e-06	up	KRH41110
GLYMA_08G013100	1.16e-19	down	KRH41152
GLYMA_08G014200	1.16e-19	down	KRH41169	Gma.35057
GLYMA_08G014400	0.000307638	down	KRH41172	Gma.19204
GLYMA_08G015300	1.16e-19	down	KRH41193	Gma.54989
GLYMA_08G015600	1.16e-19	down	KRH41201
GLYMA_08G017300	1.16e-19	down	KRH41231
GLYMA_08G018100	0.00488021	up	KRH41242	Gma.12411
GLYMA_08G019800	0.00664293	down	KRH41262	Gma.31412
GLYMA_08G022300	1.16e-19	down	KRH41305	Gma.5785
GLYMA_08G023000	0.00457606	down	KRH41315
GLYMA_08G034400	1.16e-19	down	KRH41509	Gma.22962
GLYMA_08G038200	0.000267425	down	KRH41566	Gma.37373
GLYMA_08G039200	1.45e-19	up	KRH41586
GLYMA_08G039600	1.09e-05	up	KRH41595
GLYMA_08G041100	5.31e-05	down	KRH41630	Gma.34156
GLYMA_08G041800	1.16e-19	down	KRH41644
GLYMA_08G042300	0.00750845	up	KRH41654	Gma.6507
GLYMA_08G043000	0.000506757	down	KRH41663	Gma.51674
GLYMA_08G043800	1.11e-05	down	KRH41681
GLYMA_08G044400	1.45e-19	up	KRH41688
GLYMA_08G045300	1.16e-19	down	KRH41706
GLYMA_08G048100	1.45e-19	up	KRH41747
GLYMA_08G049200	8.39e-05	down	KRH41761
GLYMA_08G049400	1.54e-05	down	KRH41764	Gma.5204
GLYMA_08G050100	0.0090233	up	KRH41771	Gma.5713
GLYMA_08G052800	8.6e-06	down	KRH41808	Gma.1462
GLYMA_08G059300	1.45e-19	up	KRH41933
GLYMA_08G060300	1.16e-19	down	KRH41951	Gma.25449
GLYMA_08G064600	0.0018555	down	KRH42029	Gma.13178
GLYMA_08G065000	0.00025535	down	KRH42038
GLYMA_08G066700	1.45e-19	up	KRH42069
GLYMA_08G070000	1.16e-19	down	KRH42116
GLYMA_08G070300	0.00343884	down	KRH42120	Gma.58906
GLYMA_08G071300	0.00292313	up	KRH42138	Gma.21651
GLYMA_08G072200	1.45e-19	up	KRH42153	Gma.11120
GLYMA_08G073300	0.000226388	down	KRH42175
GLYMA_08G073600	0.000555748	up	KRH42179	Gma.19676
GLYMA_08G074000	1.16e-19	down	KRH42185	Gma.55255
GLYMA_08G074200	1.45e-19	up	KRH42187	Gma.21195
GLYMA_08G075500	0.000265104	up	KRH42207	Gma.30915
GLYMA_08G077300	0.003737	up	KRH42233
GLYMA_08G080500	1.16e-19	down	KRH42272
GLYMA_08G080700	1.16e-19	down	KRH42274
GLYMA_08G082900	4.71e-05	down	KRH42317	Gma.4593
GLYMA_08G083800	0.00843716	up	KRH42326	Gma.26696
GLYMA_08G086600	2.7e-05	down	KRH42385	Gma.60572
GLYMA_08G087000	0.00254643	up	KRH42393	Gma.6553
GLYMA_08G089600	0.00555242	up	KRH42433
GLYMA_08G089700	1.16e-19	down	KRH42434	Gma.15734
GLYMA_08G093800	0.00113722	up	KRH42512
GLYMA_08G094200	0.00451127	down	KRH42520	Gma.2831
GLYMA_08G095200	1.22e-06	up	KRH42536	Gma.60106
GLYMA_08G099900	0.00114848	up	KRH42599
GLYMA_08G103400	1.63e-05	down	KRH42654
GLYMA_08G104100	1.16e-19	down	KRH42668
GLYMA_08G104600	1.45e-19	up	KRH42675	Gma.6557
GLYMA_08G105400	1.45e-19	up	KRH42691	Gma.11362
GLYMA_08G106000	1.45e-19	up	KRH42702	Gma.38251
GLYMA_08G107300	1.16e-19	down	KRH42721	Gma.8077
GLYMA_08G109000	1.16e-19	down	KRH42755
GLYMA_08G109200	1.45e-19	up	KRH42757
GLYMA_08G109400	1.45e-19	up	KRH42759	Gma.17605
GLYMA_08G109500	1.45e-19	up	KRH42760
GLYMA_08G110400	1.45e-19	up	KRH42777
GLYMA_08G110500	1.45e-19	up	KRH42778
GLYMA_08G110700	1.45e-19	up	KRH42780
GLYMA_08G114100	1.45e-19	up	KRH42825	Gma.54225
GLYMA_08G117200	0.00111055	down	KRH42881
GLYMA_08G125100	0.000215942	down	KRH43010
GLYMA_08G126800	0.000339424	down	KRH43040	Gma.15007
GLYMA_08G131500	0.00413811	up	KRH43111	Gma.5353
GLYMA_08G132800	0.00339966	down	KRH43133	Gma.13866
GLYMA_08G133700	0.000791737	up	KRH43150
GLYMA_08G134200	1.45e-19	up	KRH43156
GLYMA_08G135200	1.22e-06	up	KRH43176
GLYMA_08G135800	0.00234699	up	KRH43184	Gma.1232
GLYMA_08G137000	1.16e-19	down	KRH43205	Gma.5315
GLYMA_08G137500	1.16e-19	down	KRH43210
GLYMA_08G137600	1.16e-19	down	KRH43212	Gma.8896
GLYMA_08G138200	7.77e-06	down	KRH43220	Gma.31628
GLYMA_08G138800	1.45e-19	up	KRH43232	Gma.1288
GLYMA_08G140500	0.00196628	down	KRH43298
GLYMA_08G140900	1.16e-19	down	KRH43303
GLYMA_08G141400	1.16e-19	down	KRH43310	Gma.6884
GLYMA_08G142400	1.45e-19	up	KRH43323	Gma.57111
GLYMA_08G143100	1.37e-05	down	KRH43333	Gma.8741
GLYMA_08G145600	2.08e-06	down	KRH43375	Gma.22973
GLYMA_08G149800	1.45e-19	up	KRH43438
GLYMA_08G150400	1.45e-19	up	RCW19271
GLYMA_08G151100	1.45e-19	up	KRH43458
GLYMA_08G152500	1.83e-05	up	KRH43476
GLYMA_08G152800	1.16e-19	down	KRH43480
GLYMA_08G153000	0.000544661	down	KRH43488
GLYMA_08G153600	0.000410591	down	KRH43496
GLYMA_08G153700	2.08e-06	down	KRH43497
GLYMA_08G154900	0.00243529	up	KRH43521	Gma.30881
GLYMA_08G156500	0.00580302	up	KRH43550
GLYMA_08G157700	1.45e-19	up	KRH43565
GLYMA_08G158100	1.16e-19	down	KRH43569	Gma.55043
GLYMA_08G158500	1.16e-19	down	KRH43573	Gma.54794
GLYMA_08G159800	0.00155698	up	KRH43602	Gma.54745
GLYMA_08G161600	9.47e-06	down	KRH43635	Gma.6529
GLYMA_08G162200	8.75e-05	down	KRH43646
GLYMA_08G164100	0.00762966	up	KRH43683	Gma.1685
GLYMA_08G167900	1.16e-19	down	KRH43735	Gma.21228
GLYMA_08G169000	1.16e-19	down	KRH43747	Gma.37823
GLYMA_08G170400	1.16e-19	down	KRH43767
GLYMA_08G171000	1.16e-19	down	KRH43773
GLYMA_08G171100	1.16e-19	down	KRH43775
GLYMA_08G171500	0.00672831	up	KRH43781	Gma.60324
GLYMA_08G172900	0.00159375	up	KRH43803	Gma.25726
GLYMA_08G175200	5.75e-06	up	KRH43848	Gma.1917
GLYMA_08G176300	1.16e-19	down	KRH43866
GLYMA_08G177100	5.92e-06	down	KRH43877
GLYMA_08G177200	1.45e-19	up	KRH43878	Gma.51600
GLYMA_08G177400	1.16e-19	down	KRH43882
GLYMA_08G178100	1.45e-19	up	KRH43889	Gma.23841
GLYMA_08G178200	1.16e-19	down	KRH43890
GLYMA_08G178500	0.000637442	down	KRH43894
GLYMA_08G179700	1.45e-19	up	KRH43912	Gma.5629
GLYMA_08G180000	1.16e-19	down	KRH43915	Gma.55201
GLYMA_08G180800	0.000752332	up	KRH43924	Gma.56836
GLYMA_08G181000	1.16e-19	down	KRH43927	Gma.1110
GLYMA_08G182100	1.16e-19	down	KRH43945
GLYMA_08G184300	1.45e-19	up	KRH43991	Gma.11147
GLYMA_08G185600	0.00723734	down	KRH44020
GLYMA_08G185800	1.16e-19	down	KRH44033	Gma.12775
GLYMA_08G188000	1.16e-19	down	KRH44072
GLYMA_08G193500	1.16e-19	down	KRH44153
GLYMA_08G195100	1.16e-19	down	KRH44183	Gma.33139
GLYMA_08G196500	0.000148737	up	KRH44206	Gma.30912
GLYMA_08G199300	1.45e-19	up	KRH44249
GLYMA_08G199500	1.16e-19	down	KRH44252	Gma.55160
GLYMA_08G200100	1.16e-19	down	KRH44263	Gma.7697
GLYMA_08G200200	1.16e-19	down	RCW19276
GLYMA_08G202300	1.45e-19	up	KRH44298
GLYMA_08G203800	1.16e-19	down	KRH44328	Gma.1058
GLYMA_08G204300	1.45e-19	up	KRH44337
GLYMA_08G206900	0.00180443	up	KRH44373
GLYMA_08G207900	1.16e-19	down	KRH44390	Gma.2115
GLYMA_08G209300	9.38e-05	down	KRH44407	Gma.20278
GLYMA_08G210900	1.16e-19	down	KRH44432
GLYMA_08G212300	1.16e-19	down	KRH44461
GLYMA_08G213000	0.00306537	down	KRH44471	Gma.55511
GLYMA_08G213100	0.00383884	down	KRH44473
GLYMA_08G217000	0.000252717	up	KRH44530	Gma.38979
GLYMA_08G218600	1.45e-19	up	KRH44563	Gma.31966
GLYMA_08G219200	0.0015267	down	KRH44570	Gma.8393
GLYMA_08G220000	3.67e-05	down	KRH44579	Gma.11197
GLYMA_08G220200	0.00152132	up	KRH44583	Gma.28238
GLYMA_08G220500	1.22e-06	up	KRH44588	Gma.5701
GLYMA_08G222100	0.00116953	up	KRH44629	Gma.55398
GLYMA_08G222300	1.07e-06	down	KRH44632	Gma.55538
GLYMA_08G226000	0.000792969	down	KRH44696
GLYMA_08G226600	1.16e-19	down	KRH44708
GLYMA_08G231500	1.2e-05	down	KRH44793
GLYMA_08G231800	8.82e-06	up	KRH44798
GLYMA_08G232400	0.00293095	down	KRH44808	Gma.59140
GLYMA_08G235000	5.31e-05	down	KRH44852	Gma.44723
GLYMA_08G235400	1.45e-19	up	KRH44856	Gma.28254
GLYMA_08G235900	1.45e-19	up	KRH44861
GLYMA_08G238400	0.00443912	down	KRH44906
GLYMA_08G238600	3.06e-06	down	KRH44911	Gma.10338
GLYMA_08G239000	1.16e-19	down	KRH44917	Gma.4601
GLYMA_08G239300	0.000154251	down	KRH44923
GLYMA_08G239900	1.16e-19	down	KRH44930	Gma.26943
GLYMA_08G242100	0.00121321	down	KRH44980
GLYMA_08G243600	1.16e-19	down	KRH44998	Gma.21826
GLYMA_08G244700	4.6e-05	up	KRH45009	Gma.19229
GLYMA_08G246300	0.00538286	down	KRH45046
GLYMA_08G246700	1.45e-19	up	KRH45052	Gma.6636
GLYMA_08G249200	0.00182214	down	KRH45078
GLYMA_08G252500	1.45e-19	up	KRH45125
GLYMA_08G254500	1.45e-19	up	KRH45161	Gma.1689
GLYMA_08G255000	0.000207339	up	KRH45167	Gma.24663
GLYMA_08G255200	1.16e-19	down	KRH45169	Gma.25374
GLYMA_08G256600	1.16e-19	down	KRH45187	Gma.12166
GLYMA_08G259200	2.03e-05	down	KRH45223	Gma.39414
GLYMA_08G261000	0.000635224	down	KRH45254
GLYMA_08G264900	1.16e-19	down	RCW19293
GLYMA_08G269600	1.16e-19	down	KRH45407
GLYMA_08G272500	1.11e-05	down	KRH45453
GLYMA_08G272600	1.16e-19	down	KRH45456	Gma.12481
GLYMA_08G273500	1.16e-19	down	KRH45470
GLYMA_08G277000	1.45e-19	up	KRH45527
GLYMA_08G279700	2.03e-05	down	KRH45558	Gma.17738
GLYMA_08G285500	0.00362394	down	KRH45650	Gma.12776
GLYMA_08G285900	1.45e-19	up	KRH45656
GLYMA_08G286800	1.16e-19	down	KRH45668	Gma.13324
GLYMA_08G291000	0.00100383	down	KRH45743	Gma.1368
GLYMA_08G292000	3.58e-05	up	KRH45755
GLYMA_08G296800	0.0072475	down	KRH45850
GLYMA_08G297100	5.91e-05	down	KRH45853
GLYMA_08G297400	0.00154813	down	KRH45860
GLYMA_08G303800	0.00201435	down	KRH45974	Gma.1578
GLYMA_08G303900	1.16e-19	down	KRH45976
GLYMA_08G304000	0.00283016	down	KRH45978	Gma.32384
GLYMA_08G304200	0.000442925	down	KRH45981	Gma.55221
GLYMA_08G309500	0.00958449	down	KRH46058	Gma.19941
GLYMA_08G312000	1.16e-19	down	KRH46099
GLYMA_08G314800	3.59e-05	down	KRH46138	Gma.4063
GLYMA_08G316500	1.22e-06	up	KRH46182	Gma.8111
GLYMA_08G318400	1.16e-19	down	KRH46208
GLYMA_08G321400	1.45e-19	up	KRH46245	Gma.25063
GLYMA_08G323200	0.00255402	up	KRH46266
GLYMA_08G329300	0.000101393	down	KRH46369
GLYMA_08G330100	1.45e-19	up	KRH46382
GLYMA_08G331900	1.22e-06	up	KRH46412	Gma.57310
GLYMA_08G332300	2.08e-06	down	KRH46418
GLYMA_08G332900	1.45e-19	up	KRH46427	Gma.31075
GLYMA_08G334500	0.000925647	up	KRH46451	Gma.7694
GLYMA_08G335700	1.22e-06	up	KRH46471	Gma.52742
GLYMA_08G336100	1.07e-06	down	KRH46476
GLYMA_08G339300	1.45e-19	up	KRH46519
GLYMA_08G339500	1.45e-19	up	KRH46521	Gma.32500
GLYMA_08G339600	1.45e-19	up	KRH46522	Gma.2536
GLYMA_08G341400	1.45e-19	up	KRH46552	Gma.32387
GLYMA_08G341600	1.16e-19	down	KRH46554	Gma.12394
GLYMA_08G341700	1.16e-19	down	KRH46555	Gma.13341
GLYMA_08G342100	1.16e-19	down	KRH46559	Gma.10904
GLYMA_08G343800	0.00122141	up	KRH46580	Gma.31210
GLYMA_08G345000	1.22e-06	up	KRH46600	Gma.52086
GLYMA_08G346700	0.0071856	up	KRH46622
GLYMA_08G350800	1.16e-19	down	KRH46682	Gma.5510
GLYMA_08G350900	1.07e-06	down	KRH46685
GLYMA_08G355000	4.42e-05	up	KRH46757
GLYMA_08G356500	0.00951157	down	KRH46789
GLYMA_08G358300	0.00255743	up	KRH46816
GLYMA_08G362900	0.00219362	up	KRH46896	Gma.11255
GLYMA_08G363600	1.16e-19	down	KRH46905	Gma.59875
GLYMA_08G364000	0.00133901	up	KRH46911
GLYMA_08G365100	0.000105019	down	KRH46923
GLYMA_09G000600	0.00033244	up	KRH36386
GLYMA_09G000700	1.45e-19	up	KRH36391	Gma.12170
GLYMA_09G004400	1.16e-19	down	KRH36471	Gma.5648
GLYMA_09G005600	1.16e-19	down	KRH36484	Gma.866
GLYMA_09G005700	1.45e-19	up	KRH36485	Gma.28283
GLYMA_09G007300	0.00618813	up	KRH36504	Gma.12507
GLYMA_09G008100	0.00287486	down	KRH36517	Gma.59011
GLYMA_09G013700	0.00049729	down	KRH36596	Gma.52123
GLYMA_09G018500	0.000425634	down	KRH36696	Gma.21436
GLYMA_09G018600	1.16e-19	down	KRH36697
GLYMA_09G018900	1.45e-19	up	KRH36704	Gma.2638
GLYMA_09G022300	1.45e-19	up	KRH36763	Gma.876
GLYMA_09G022400	1.45e-19	up	KRH36764	Gma.31485
GLYMA_09G028000	1.45e-19	up	KRH36850
GLYMA_09G030300	1.45e-19	up	KRH36892
GLYMA_09G032400	2.62e-05	down	KRH36933
GLYMA_09G034500	0.000133333	down	KRH36958
GLYMA_09G038500	1.16e-19	down	KRH37012
GLYMA_09G038600	1.45e-19	up	KRH37013
GLYMA_09G040500	1.45e-19	up	KRH37040	Gma.2346
GLYMA_09G040600	1.45e-19	up	KRH37041	Gma.5947
GLYMA_09G041500	0.00811413	up	KRH37061	Gma.5517
GLYMA_09G041900	1.45e-19	up	KRH37065	Gma.25897
GLYMA_09G042400	1.45e-19	up	KRH37070
GLYMA_09G044500	0.000202634	down	KRH37107
GLYMA_09G047200	0.000425634	down	KRH37142	Gma.30720
GLYMA_09G049100	1.45e-19	up	KRH37172	Gma.5611
GLYMA_09G050100	1.16e-19	down	KRH37186
GLYMA_09G051100	1.16e-19	down	KRH37200	Gma.23844
GLYMA_09G051900	1.45e-19	up	KRH37211
GLYMA_09G060200	1.16e-19	down	KRH37338	Gma.12279
GLYMA_09G061900	0.00116475	up	KRH37367	Gma.27999
GLYMA_09G062600	1.16e-19	down	KRH37378	Gma.31477
GLYMA_09G062900	1.07e-06	down	KRH37385	Gma.31497
GLYMA_09G063200	1.16e-19	down	KRH37394	Gma.58454
GLYMA_09G066700	0.000203933	down	KRH37446	Gma.23820
GLYMA_09G068400	0.00186292	down	KRH37469	Gma.36504
GLYMA_09G071400	1.16e-19	down	KRH37524	Gma.56897
GLYMA_09G071800	0.00667521	down	KRH37531	Gma.22895
GLYMA_09G073600	1.45e-19	up	KRH37558	Gma.30864
GLYMA_09G073900	1.16e-19	down	KRH37562	Gma.1319
GLYMA_09G080100	1.16e-19	down	KRH37653	Gma.4182
GLYMA_09G081800	0.00417729	down	KRH37683
GLYMA_09G087200	7.59e-05	down	KRH37756
GLYMA_09G089500	1.16e-19	down	KRH37791
GLYMA_09G089600	1.16e-19	down	KRH37793
GLYMA_09G089700	1.45e-19	up	KRH37796
GLYMA_09G092100	0.00646945	down	KRH37826
GLYMA_09G093400	1.16e-19	down	KRH37849
GLYMA_09G094800	0.0021287	up	KRH37867	Gma.54689
GLYMA_09G096700	1.16e-19	down	KRH37888	Gma.16684
GLYMA_09G098000	1.16e-19	down	KRH37909
GLYMA_09G099000	0.00356586	down	KRH37922
GLYMA_09G103000	1.16e-19	down	KRH37989
GLYMA_09G103500	0.00754588	down	KRH38003
GLYMA_09G123800	0.0076786	up	KRH38276	Gma.32786
GLYMA_09G126400	1.16e-19	down	KRH38306
GLYMA_09G127000	0.0037307	down	KRH38313
GLYMA_09G127700	0.000123352	up	KRH38320	Gma.8532
GLYMA_09G130400	1.45e-19	up	KRH38360	Gma.35601
GLYMA_09G131500	1.45e-19	up	KRH38373	Gma.23666
GLYMA_09G134600	1.16e-19	down	KRH38407
GLYMA_09G134700	0.00330348	down	KRH38408
GLYMA_09G135700	0.000137566	down	KRH38431
GLYMA_09G135800	0.0004	down	KRH38432	Gma.9105
GLYMA_09G138100	1.45e-19	up	KRH38473	Gma.3578
GLYMA_09G147500	1.16e-19	down	KRH38620
GLYMA_09G148200	1.45e-19	up	KRH38629
GLYMA_09G151900	0.00763975	up	KRH38699	Gma.28148
GLYMA_09G154100	1.16e-19	down	KRH38730
GLYMA_09G155500	1.16e-19	down	KRH38749	Gma.37257
GLYMA_09G156900	0.00570914	up	KRH38774	Gma.3561
GLYMA_09G160000	3.12e-05	down	KRH38814
GLYMA_09G162400	1.45e-19	up	KRH38854	Gma.19960
GLYMA_09G167900	1.16e-19	down	KRH38937	Gma.32906
GLYMA_09G168900	3.59e-05	down	KRH38971	Gma.33521
GLYMA_09G171000	0.000719388	up	KRH39000	Gma.62120
GLYMA_09G171600	0.0084018	up	KRH39011
GLYMA_09G173200	1.45e-19	up	KRH39032	Gma.2105
GLYMA_09G178100	1.45e-19	up	KRH39110	Gma.2801
GLYMA_09G179400	0.0015267	down	KRH39124
GLYMA_09G179900	1.45e-19	up	KRH39130
GLYMA_09G182400	1.45e-19	up	KRH39162
GLYMA_09G185100	1.45e-19	up	KRH39207
GLYMA_09G186300	0.00373086	down	KRH39220	Gma.1457
GLYMA_09G187300	1.16e-19	down	KRH39234	Gma.57209
GLYMA_09G196000	1.16e-19	down	KRH39392
GLYMA_09G196400	1.45e-19	up	KRH39399	Gma.35319
GLYMA_09G198900	1.45e-19	up	KRH39448
GLYMA_09G199300	0.00010571	down	KRH39457
GLYMA_09G199900	6.41e-05	up	KRH39471	Gma.55945
GLYMA_09G202600	3.95e-05	down	KRH39513
GLYMA_09G202700	1.22e-06	up	KRH39516
GLYMA_09G204500	0.0046791	down	KRH39540
GLYMA_09G210700	0.000468641	up	KRH39630
GLYMA_09G216300	1.16e-19	down	KRH39723
GLYMA_09G216900	4.95e-06	down	KRH39741
GLYMA_09G223600	0.000464626	down	KRH39839
GLYMA_09G223700	0.000228613	down	KRH39840	Gma.3539
GLYMA_09G225400	1.45e-19	up	KRH39870
GLYMA_09G225700	1.16e-19	down	KRH39881
GLYMA_09G226300	0.000429452	down	KRH39896
GLYMA_09G226700	1.16e-19	down	KRH39902	Gma.31609
GLYMA_09G230500	1.16e-19	down	KRH39964
GLYMA_09G232900	1.45e-19	up	KRH40009
GLYMA_09G235400	0.00282475	down	KRH40054	Gma.30776
GLYMA_09G236500	0.00137358	up	KRH40075
GLYMA_09G238100	1.45e-19	up	KRH40095
GLYMA_09G238200	1.16e-19	down	KRH40096
GLYMA_09G246600	8.83e-05	up	KRH40243
GLYMA_09G248600	1.45e-19	up	KRH40275	Gma.55802
GLYMA_09G249100	0.00166295	up	KRH40284
GLYMA_09G249200	0.000339424	down	KRH40285	Gma.17766
GLYMA_09G250200	1.22e-06	up	KRH40301	Gma.6602
GLYMA_09G250700	1.45e-19	up	KRH40307	Gma.56104
GLYMA_09G251200	1.63e-05	down	KRH40313
GLYMA_09G251300	4.71e-05	down	KRH40316	Gma.27250
GLYMA_09G252100	1.11e-05	down	KRH40336	Gma.35030
GLYMA_09G252800	8.46e-05	down	KRH40347
GLYMA_09G255100	0.00126378	down	KRH40380	Gma.45430
GLYMA_09G260600	2.7e-05	down	KRH40472	Gma.13080
GLYMA_09G262800	1.16e-19	down	KRH40504
GLYMA_09G263500	0.00285739	down	KRH40512
GLYMA_09G263900	0.000173105	down	KRH40518
GLYMA_09G268900	0.000114613	up	KRH40594	Gma.43207
GLYMA_09G272100	1.45e-19	up	KRH40648	Gma.22363
GLYMA_09G273600	0.00241799	down	KRH40715
GLYMA_09G274000	1.45e-19	up	KRH40720
GLYMA_09G275100	1.45e-19	up	KRH40739
GLYMA_09G275300	4.11e-05	down	KRH40742
GLYMA_09G277000	1.45e-19	up	KRH40769
GLYMA_09G277200	0.0012343	down	KRH40784	Gma.35161
GLYMA_09G277800	1.45e-19	up	KRH40790	Gma.57506
GLYMA_09G281900	1.45e-19	up	KRH40859	Gma.3642
GLYMA_09G283400	3.95e-05	down	KRH40890	Gma.59565
GLYMA_09G284300	0.00150246	down	KRH40902
GLYMA_09G284500	0.00199581	down	KRH40904
GLYMA_10G000600	1.22e-06	up	KRH31614
GLYMA_10G000900	1.16e-19	down	KRH31618	Gma.13108
GLYMA_10G002100	4.95e-06	down	KRH31637
GLYMA_10G002300	0.0014273	up	KRH31639	Gma.55138
GLYMA_10G003200	0.00232035	down	KRH31658
GLYMA_10G009700	6.83e-06	down	KRH31746
GLYMA_10G010100	1.45e-19	up	KRH31756	Gma.5622
GLYMA_10G010800	1.16e-19	down	KRH31765
GLYMA_10G011300	1.45e-19	up	KRH31775	Gma.28252
GLYMA_10G011700	0.00130049	up	KRH31779	Gma.2087
GLYMA_10G014400	1.45e-19	up	KRH31818	Gma.1583
GLYMA_10G014700	0.000603611	up	KRH31823	Gma.18381
GLYMA_10G015800	1.16e-19	down	KRH31839
GLYMA_10G016100	1.16e-19	down	KRH31844
GLYMA_10G016200	5e-05	up	KRH31845	Gma.16566
GLYMA_10G023300	0.000814753	up	KRH31958
GLYMA_10G026400	0.000651515	down	KRH32016
GLYMA_10G026600	1.16e-19	down	KRH32018	Gma.56032
GLYMA_10G028700	6.69e-05	up	KRH32048
GLYMA_10G031900	0.00101275	down	KRH32099	Gma.5105
GLYMA_10G036700	1.16e-19	down	KRH32180
GLYMA_10G037500	1.16e-19	down	KRH32191
GLYMA_10G039100	0.00855457	down	KRH32224
GLYMA_10G039800	0.00033927	up	KRH32243	Gma.872
GLYMA_10G043200	0.00547537	down	KRH32295
GLYMA_10G048600	2.89e-05	up	KRH32387	Gma.10688
GLYMA_10G050500	0.00760712	down	KRH32427
GLYMA_10G050800	0.0019206	up	KRH32430
GLYMA_10G053000	1.45e-19	up	KRH32475
GLYMA_10G054900	1.16e-19	down	KRH32505	Gma.14000
GLYMA_10G056600	1.16e-19	down	KRH32525	Gma.12859
GLYMA_10G057300	1.16e-19	down	KRH32532
GLYMA_10G059500	0.00327787	down	KRH32560	Gma.56433
GLYMA_10G059800	0.00464521	up	KRH32563
GLYMA_10G060300	1.45e-19	up	KRH32571
GLYMA_10G061700	1.45e-19	up	KRH32585
GLYMA_10G063800	1.29e-05	down	KRH32614	Gma.10341
GLYMA_10G064200	1.16e-19	down	KRH32618
GLYMA_10G066500	0.00384781	up	KRH32657	Gma.54851
GLYMA_10G069500	1.45e-19	up	KRH32710	Gma.62422
GLYMA_10G079700	1.45e-19	up	KRH32833	Gma.4535
GLYMA_10G079900	0.00414243	up	KRH32835
GLYMA_10G088000	1.16e-19	down	KRH32940
GLYMA_10G089300	1.16e-19	down	KRH32955	Gma.52595
GLYMA_10G090500	0.00915274	down	KRH32973	Gma.30707
GLYMA_10G092800	1.16e-19	down	KRH33004
GLYMA_10G094900	1.16e-19	down	KRH33043
GLYMA_10G097800	1.16e-19	down	KRH33078	Gma.12621
GLYMA_10G099400	1.16e-19	down	KRH33097
GLYMA_10G103000	4.95e-06	down	KRH33159	Gma.26822
GLYMA_10G104700	1.16e-19	down	KRH33181
GLYMA_10G105300	1.16e-19	down	KRH33188
GLYMA_10G106600	1.45e-19	up	KRH33203	Gma.16696
GLYMA_10G111800	4.07e-06	down	KRH33276
GLYMA_10G113100	0.00375366	down	KRH33290	Gma.61828
GLYMA_10G117200	1.16e-19	down	KRH33344
GLYMA_10G122200	1.22e-06	up	KRH33422
GLYMA_10G124200	9.47e-06	down	KRH33460
GLYMA_10G125000	1.16e-19	down	KRH33474	Gma.31783
GLYMA_10G127800	1.45e-19	up	KRH33513
GLYMA_10G128400	5.61e-05	down	KRH33522	Gma.22529
GLYMA_10G129800	3.54e-06	up	KRH33537
GLYMA_10G130200	1.16e-19	down	KRH33541	Gma.15511
GLYMA_10G133100	0.00202665	up	KRH33577	Gma.58902
GLYMA_10G136300	1.16e-19	down	KRH33618	Gma.16973
GLYMA_10G139500	1.16e-19	down	KRH33683	Gma.12535
GLYMA_10G139700	1.16e-19	down	KRH33687	Gma.56260
GLYMA_10G142100	1.07e-06	down	KRH33722	Gma.59731
GLYMA_10G142700	3.06e-06	down	KRH33736	Gma.52476
GLYMA_10G145300	1.16e-19	down	KRH33786	Gma.5637
GLYMA_10G145900	1.16e-19	down	KRH33794	Gma.10830
GLYMA_10G147100	7.62e-05	up	KRH33821	Gma.55866
GLYMA_10G147700	1.16e-19	down	KRH33831	Gma.6889
GLYMA_10G150300	1.16e-19	down	KRH33866
GLYMA_10G151000	1.16e-19	down	KRH33878	Gma.24364
GLYMA_10G152200	1.45e-19	up	KRH33894
GLYMA_10G153100	1.16e-19	down	KRH33907
GLYMA_10G154500	1.22e-06	up	KRH33948	Gma.15097
GLYMA_10G156500	1.45e-19	up	KRH33975	Gma.63166
GLYMA_10G156900	0.00577482	up	KRH33979	Gma.8431
GLYMA_10G157000	1.16e-19	down	KRH33984
GLYMA_10G157900	0.00279421	up	KRH33996
GLYMA_10G158900	5.31e-05	down	KRH34020
GLYMA_10G160600	9.38e-05	down	KRH34067	Gma.20986
GLYMA_10G160900	1.11e-05	down	KRH34070	Gma.3114
GLYMA_10G161800	9.47e-06	down	KRH34081
GLYMA_10G162400	0.00705685	down	KRH34091	Gma.4259
GLYMA_10G166400	0.000302408	down	KRH34155
GLYMA_10G167800	1.16e-19	down	KRH34170	Gma.9265
GLYMA_10G168100	1.16e-19	down	KRH34173
GLYMA_10G168200	1.16e-19	down	KRH34174
GLYMA_10G169300	1.45e-19	up	KRH34197
GLYMA_10G169600	0.00182358	up	KRH34201	Gma.2885
GLYMA_10G170800	1.46e-05	down	KRH34221
GLYMA_10G171800	5.61e-05	down	KRH34237
GLYMA_10G172700	1.45e-19	up	KRH34255	Gma.63944
GLYMA_10G176500	1.45e-19	up	KRH34329
GLYMA_10G179200	1.16e-19	down	KRH34361
GLYMA_10G179400	1.16e-19	down	KRH34362
GLYMA_10G179500	0.00324887	up	KRH34363	Gma.28878
GLYMA_10G179700	1.16e-19	down	KRH34367
GLYMA_10G180000	0.000796357	down	KRH34376
GLYMA_10G183500	1.22e-06	up	KRH34434	Gma.55720
GLYMA_10G184900	0.00235003	down	KRH34456	Gma.32220
GLYMA_10G185000	2.55e-05	down	KRH34460	Gma.55059
GLYMA_10G186500	2.32e-05	up	KRH34477	Gma.3262
GLYMA_10G186700	4.95e-06	down	KRH34482
GLYMA_10G192900	1.45e-19	up	KRH34584	Gma.4305
GLYMA_10G193500	1.16e-19	down	KRH34597	Gma.16827
GLYMA_10G194200	1.16e-19	down	KRH34607	Gma.27568
GLYMA_10G200700	1.45e-19	up	KRH34705
GLYMA_10G200800	1.16e-19	down	KRH34706	Gma.23240
GLYMA_10G202000	1.22e-06	up	KRH34730	Gma.2335
GLYMA_10G205500	8.6e-06	down	KRH34779	Gma.12444
GLYMA_10G206600	0.000664694	down	KRH34792
GLYMA_10G208800	0.00585221	down	KRH34828
GLYMA_10G210300	1.22e-06	up	KRH34861
GLYMA_10G210500	0.00288473	down	KRH34865
GLYMA_10G211000	0.00340284	down	KRH34876	Gma.30907
GLYMA_10G211300	0.00336312	down	KRH34879
GLYMA_10G212000	0.000193382	down	KRH34889	Gma.4004
GLYMA_10G212300	0.00738787	up	KRH34892
GLYMA_10G212500	0.000233309	down	KRH34895
GLYMA_10G212900	1.45e-19	up	KRH34904	Gma.54322
GLYMA_10G214500	0.00376054	down	KRH34941	Gma.18247
GLYMA_10G217900	0.0019512	down	KRH34998	Gma.5861
GLYMA_10G221000	0.00634353	down	KRH35063
GLYMA_10G222100	1.16e-19	down	KRH35099	Gma.13184
GLYMA_10G222300	1.16e-19	down	KRH35104	Gma.27386
GLYMA_10G222500	1.45e-19	up	KRH35106
GLYMA_10G225100	0.000143934	down	RCW19222
GLYMA_10G225400	0.000277699	down	KRH35153	Gma.55506
GLYMA_10G230000	1.45e-19	up	KRH35228	Gma.25948
GLYMA_10G230600	1.45e-19	up	KRH35234	Gma.17559
GLYMA_10G231700	0.005986	down	KRH35248
GLYMA_10G232600	3.67e-05	down	KRH35261
GLYMA_10G233300	5.76e-05	down	KRH35275
GLYMA_10G234500	1.16e-19	down	KRH35293
GLYMA_10G235700	1.16e-19	down	KRH35311
GLYMA_10G237500	1.16e-19	down	KRH35349
GLYMA_10G237800	1.45e-19	up	KRH35353
GLYMA_10G239200	1.16e-19	down	KRH35380
GLYMA_10G239900	2.32e-05	up	KRH35390
GLYMA_10G242100	0.00809401	up	RCW19224
GLYMA_10G242600	0.0037653	down	KRH35429	Gma.30762
GLYMA_10G243600	0.0021287	up	KRH35444	Gma.666
GLYMA_10G243800	1.16e-19	down	KRH35449	Gma.32517
GLYMA_10G244200	1.89e-05	down	KRH35460	Gma.21774
GLYMA_10G245400	1.16e-19	down	KRH35484	Gma.36767
GLYMA_10G247000	0.000273632	down	KRH35506
GLYMA_10G248900	1.16e-19	down	KRH35532	Gma.30772
GLYMA_10G249000	0.00369769	down	KRH35533	Gma.31528
GLYMA_10G251000	1.16e-19	down	KRH35568	Gma.850
GLYMA_10G252400	0.00509037	down	KRH35598	Gma.52471
GLYMA_10G253000	0.000121442	up	KRH35608
GLYMA_10G253200	1.45e-19	up	KRH35610
GLYMA_10G255800	1.45e-19	up	KRH35647
GLYMA_10G256000	3.06e-06	down	KRH35649
GLYMA_10G257200	1.45e-19	up	KRH35665	Gma.61836
GLYMA_10G257900	0.000963394	up	KRH35675	Gma.31108
GLYMA_10G258800	1.45e-19	up	KRH35692	Gma.24531
GLYMA_10G260200	0.00113763	down	KRH35709	Gma.55757
GLYMA_10G261000	1.16e-19	down	KRH35722
GLYMA_10G261400	1.45e-19	up	KRH35731
GLYMA_10G262800	0.00415751	down	KRH35746
GLYMA_10G263000	0.00532682	down	KRH35751	Gma.3450
GLYMA_10G263400	1.16e-19	down	KRH35756
GLYMA_10G268500	4.66e-06	up	KRH35848
GLYMA_10G269200	1.16e-19	down	KRH35865
GLYMA_10G269400	0.00176731	down	KRH35870
GLYMA_10G269700	0.00778252	up	KRH35879
GLYMA_10G270800	1.16e-19	down	KRH35898
GLYMA_10G271000	0.000314749	down	KRH35900
GLYMA_10G274400	1.16e-19	down	KRH35956	Gma.59323
GLYMA_10G275000	1.45e-19	up	KRH35964
GLYMA_10G276700	1.45e-19	up	KRH35989	Gma.21407
GLYMA_10G277800	0.000783966	up	KRH36001	Gma.193
GLYMA_10G278900	1.45e-19	up	KRH36018	Gma.55898
GLYMA_10G281400	0.000311441	down	KRH36064	Gma.2503
GLYMA_10G281600	1.45e-19	up	KRH36067
GLYMA_10G283800	1.16e-19	down	KRH36103
GLYMA_10G284400	1.16e-19	down	KRH36118
GLYMA_10G285900	4.95e-06	down	KRH36141
GLYMA_10G286300	0.00486769	down	KRH36145
GLYMA_10G291000	1.16e-19	down	KRH36211
GLYMA_10G293500	0.00267172	down	KRH36260	Gma.60249
GLYMA_10G295200	1.45e-19	up	KRH36302	Gma.17534
GLYMA_10G295300	1.45e-19	up	KRH36303	Gma.5621
GLYMA_10G295400	1.22e-06	up	KRH36305
GLYMA_11G000500	1.45e-19	up	KRH27564	Gma.5478
GLYMA_11G001200	1.45e-19	up	KRH27572
GLYMA_11G002400	1.45e-19	up	KRH27587	Gma.13008
GLYMA_11G003600	0.000986744	up	KRH27604	Gma.56889
GLYMA_11G004200	1.45e-19	up	KRH27615
GLYMA_11G004800	1.45e-19	up	KRH27626
GLYMA_11G006400	0.000254818	down	KRH27651
GLYMA_11G006600	3.54e-06	up	KRH27653	Gma.56359
GLYMA_11G008400	1.16e-19	down	KRH27681
GLYMA_11G010500	1.45e-19	up	KRH27719	Gma.61485
GLYMA_11G011500	1.45e-19	up	KRH27737	Gma.10675
GLYMA_11G011800	0.000163873	up	KRH27743	Gma.55033
GLYMA_11G012000	4.17e-05	down	KRH27747
GLYMA_11G012700	0.000486431	down	KRH27766	Gma.56769
GLYMA_11G014100	0.00562094	up	KRH27791	Gma.6660
GLYMA_11G014300	4.71e-05	down	KRH27793
GLYMA_11G017500	1.45e-19	up	KRH27840
GLYMA_11G017900	1.16e-19	down	KRH27846
GLYMA_11G018100	7.78e-05	down	KRH27850	Gma.24163
GLYMA_11G018900	1.16e-19	down	KRH27858
GLYMA_11G020700	0.000265104	up	KRH27881
GLYMA_11G022400	1.16e-19	down	KRH27904	Gma.37123
GLYMA_11G023900	0.0018612	up	KRH27929
GLYMA_11G024100	1.45e-19	up	KRH27931	Gma.10886
GLYMA_11G025700	8.82e-06	up	KRH27962	Gma.28
GLYMA_11G027400	0.000265766	up	KRH27984	Gma.25337
GLYMA_11G029700	0.00357463	up	KRH28022
GLYMA_11G030500	0.00185399	up	KRH28033	Gma.59858
GLYMA_11G032200	1.16e-19	down	KRH28069
GLYMA_11G036400	1.45e-19	up	KRH28164	Gma.41651
GLYMA_11G037100	1.16e-19	down	KRH28178
GLYMA_11G038600	1.16e-19	down	KRH28200	Gma.59294
GLYMA_11G039400	1.22e-06	up	KRH28213
GLYMA_11G042200	4.25e-05	down	KRH28276
GLYMA_11G043300	0.000163873	up	KRH28291
GLYMA_11G043400	0.00507299	down	KRH28292	Gma.52525
GLYMA_11G045100	0.000207273	down	KRH28314
GLYMA_11G046700	2.24e-05	up	KRH28333
GLYMA_11G048100	0.000633562	up	KRH28357	Gma.54717
GLYMA_11G049600	3.59e-05	down	KRH28377	Gma.25688
GLYMA_11G051300	1.97e-05	down	KRH28410	Gma.55067
GLYMA_11G053100	9.84e-05	up	KRH28431	Gma.54816
GLYMA_11G053400	1.16e-19	down	KRH28437	Gma.2141
GLYMA_11G054000	2.08e-06	down	KRH28443
GLYMA_11G054300	0.00925787	down	KRH28447
GLYMA_11G054800	0.000161169	down	KRH28457
GLYMA_11G055700	1.16e-19	down	KRH28470	Gma.7824
GLYMA_11G056700	1.16e-19	down	KRH28480	Gma.53469
GLYMA_11G059200	1.16e-19	down	KRH28523
GLYMA_11G060600	0.000715745	up	KRH28543
GLYMA_11G060900	2.62e-05	down	KRH28548
GLYMA_11G061300	1.16e-19	down	KRH28553	Gma.55215
GLYMA_11G065000	0.000464261	down	KRH28624	Gma.7256
GLYMA_11G067100	1.16e-19	down	KRH28655	Gma.24612
GLYMA_11G069300	0.00492795	down	KRH28689
GLYMA_11G070200	1.45e-19	up	KRH28702
GLYMA_11G070500	1.45e-19	up	KRH28705	Gma.51777
GLYMA_11G071400	0.00970585	down	KRH28718	Gma.20182
GLYMA_11G071700	1.45e-19	up	KRH28722	Gma.5681
GLYMA_11G073400	0.000236559	down	KRH28743
GLYMA_11G074900	1.16e-19	down	KRH28766	Gma.3546
GLYMA_11G075500	0.000157025	down	KRH28779	Gma.55567
GLYMA_11G077400	0.000247956	up	KRH28802	Gma.7796
GLYMA_11G077700	1.16e-19	down	KRH28805
GLYMA_11G079500	0.00156399	down	KRH28832
GLYMA_11G080600	1.45e-19	up	KRH28848	Gma.4937
GLYMA_11G080800	1.22e-06	up	KRH28851	Gma.6511
GLYMA_11G081000	0.00892033	up	KRH28853	Gma.1640
GLYMA_11G087100	0.00397605	down	KRH28938
GLYMA_11G087600	6.46e-05	down	KRH28945
GLYMA_11G087700	0.00276044	down	KRH28947	Gma.24472
GLYMA_11G090200	1.16e-19	down	KRH28987
GLYMA_11G091400	1.45e-19	up	KRH29001	Gma.175
GLYMA_11G093900	3.67e-05	down	KRH29048
GLYMA_11G095400	9.72e-05	down	KRH29070
GLYMA_11G096300	0.00068832	down	KRH29087
GLYMA_11G096400	5.75e-06	up	KRH29088
GLYMA_11G098300	0.000121813	up	KRH29113	Gma.5782
GLYMA_11G099700	1.45e-19	up	KRH29132	Gma.29053
GLYMA_11G100700	1.19e-05	up	KRH29145	Gma.29296
GLYMA_11G100800	1.11e-05	down	RCW19162
GLYMA_11G101400	0.00798046	up	KRH29159	Gma.32609
GLYMA_11G101500	1.45e-19	up	KRH29160
GLYMA_11G102300	0.00230473	down	KRH29178	Gma.14215
GLYMA_11G103500	0.00161304	down	KRH29215	Gma.12281
GLYMA_11G104100	1.16e-19	down	KRH29222	Gma.53184
GLYMA_11G105800	1.16e-19	down	KRH29260	Gma.55984
GLYMA_11G109100	3.95e-05	down	KRH29309
GLYMA_11G109400	3.38e-05	up	KRH29315	Gma.8831
GLYMA_11G110000	1.16e-19	down	KRH29324	Gma.8674
GLYMA_11G110300	1.22e-06	up	KRH29329	Gma.3085
GLYMA_11G110900	2.08e-06	down	KRH29345	Gma.27677
GLYMA_11G111000	1.09e-05	up	KRH29347
GLYMA_11G112600	0.00275479	down	KRH29372
GLYMA_11G112900	1.07e-06	down	KRH29379
GLYMA_11G114300	1.45e-19	up	KRH29399	Gma.21689
GLYMA_11G116600	4.95e-06	down	KRH29437	Gma.59638
GLYMA_11G116800	1.45e-19	up	KRH29444
GLYMA_11G117900	1.22e-06	up	KRH29461	Gma.534
GLYMA_11G118100	1.16e-19	down	KRH29467
GLYMA_11G119000	1.45e-19	up	KRH29486	Gma.4624
GLYMA_11G119500	1.45e-19	up	KRH29493	Gma.3580
GLYMA_11G120300	2.89e-05	up	KRH29502
GLYMA_11G120800	0.000800649	down	KRH29511	Gma.10455
GLYMA_11G121700	1.16e-19	down	KRH29529	Gma.24754
GLYMA_11G121800	1.16e-19	down	KRH29530	Gma.16723
GLYMA_11G122700	0.00429636	down	KRH29541	Gma.28901
GLYMA_11G123300	1.16e-19	down	KRH29547
GLYMA_11G123900	0.00129036	down	KRH29555	Gma.2377
GLYMA_11G124500	1.45e-19	up	KRH29572	Gma.29716
GLYMA_11G125100	1.45e-19	up	KRH29582
GLYMA_11G127100	0.000259972	down	KRH29616	Gma.33255
GLYMA_11G127800	1.16e-19	down	KRH29631
GLYMA_11G130200	0.00199161	down	KRH29668
GLYMA_11G133800	0.00423852	down	KRH29718	Gma.25539
GLYMA_11G134200	0.00424586	down	KRH29724	Gma.11272
GLYMA_11G135900	4.95e-06	down	KRH29743	Gma.27704
GLYMA_11G137300	1.45e-19	up	KRH29763
GLYMA_11G139800	1.16e-19	down	KRH29804
GLYMA_11G140500	1.45e-19	up	KRH29811	Gma.30700
GLYMA_11G140600	3.74e-05	down	KRH29812	Gma.32745
GLYMA_11G142900	1.16e-19	down	KRH29852
GLYMA_11G145400	0.000228613	down	KRH29906
GLYMA_11G147100	0.00816823	down	KRH29926
GLYMA_11G149600	0.000455041	down	RCW19171
GLYMA_11G150400	1.16e-19	down	KRH29973	Gma.4330
GLYMA_11G151800	1.16e-19	down	KRH29988	Gma.51810
GLYMA_11G152400	0.000111962	up	KRH29994	Gma.20272
GLYMA_11G155000	1.45e-19	up	KRH30055
GLYMA_11G155100	1.45e-19	up	KRH30056
GLYMA_11G158500	0.000381963	up	KRH30101	Gma.45300
GLYMA_11G161600	1.16e-19	down	KRH30136
GLYMA_11G163300	1.45e-19	up	KRH30155	Gma.21752
GLYMA_11G164700	1.16e-19	down	KRH30172	Gma.31917
GLYMA_11G171400	1.16e-19	down	KRH30266	Gma.197
GLYMA_11G173700	1.16e-19	down	KRH30292
GLYMA_11G176000	1.16e-19	down	KRH30324
GLYMA_11G176200	1.07e-06	down	KRH30327
GLYMA_11G179300	1.45e-19	up	KRH30359	Gma.5129
GLYMA_11G180500	1.45e-19	up	KRH30376	Gma.55046
GLYMA_11G181100	0.00177063	down	KRH30385	Gma.22583
GLYMA_11G181300	0.00141337	down	KRH30387
GLYMA_11G188300	3.35e-05	down	KRH30500	Gma.18603
GLYMA_11G188800	1.16e-19	down	KRH30509
GLYMA_11G189500	1.45e-19	up	KRH30517
GLYMA_11G189600	1.16e-19	down	KRH30518	Gma.58941
GLYMA_11G192500	0.00720602	down	KRH30554	Gma.32160
GLYMA_11G192600	1.16e-19	down	KRH30555
GLYMA_11G192700	1.16e-19	down	KRH30557	Gma.6384
GLYMA_11G192900	1.22e-06	up	KRH30562
GLYMA_11G194500	0.00553328	up	KRH30593
GLYMA_11G200400	0.00378688	down	KRH30683
GLYMA_11G202900	0.00392582	down	KRH30722
GLYMA_11G203000	1.45e-19	up	KRH30725
GLYMA_11G204200	0.00545149	down	KRH30741
GLYMA_11G207000	1.45e-19	up	KRH30798	Gma.3367
GLYMA_11G208700	1.16e-19	down	KRH30829	Gma.7769
GLYMA_11G211100	1.45e-19	up	KRH30867
GLYMA_11G215200	1.16e-19	down	KRH30926	Gma.42703
GLYMA_11G215500	4.6e-05	up	KRH30930	Gma.32142
GLYMA_11G215700	0.000813758	up	KRH30932	Gma.17450
GLYMA_11G215800	0.000406167	up	KRH30933	Gma.28855
GLYMA_11G216400	1.16e-19	down	KRH30941	Gma.34740
GLYMA_11G216500	0.00196691	down	KRH30942	Gma.15127
GLYMA_11G216800	1.16e-19	down	KRH30947
GLYMA_11G221000	3.2e-05	down	KRH31003	Gma.30736
GLYMA_11G222600	0.000191317	down	KRH31027	Gma.60785
GLYMA_11G225600	1.45e-19	up	KRH31069	Gma.26208
GLYMA_11G226800	0.000260398	up	KRH31095	Gma.54893
GLYMA_11G226900	0.000546309	down	KRH31096	Gma.2026
GLYMA_11G228000	1.16e-19	down	KRH31119	Gma.30856
GLYMA_11G228100	1.45e-19	up	KRH31120	Gma.31851
GLYMA_11G228800	1.16e-19	down	KRH31130	Gma.2362
GLYMA_11G229100	2.39e-06	up	KRH31133	Gma.28556
GLYMA_11G229700	0.00356311	up	KRH31142
GLYMA_11G230700	1.16e-19	down	KRH31154
GLYMA_11G231500	1.16e-19	down	KRH31169	Gma.51826
GLYMA_11G237200	1.45e-19	up	KRH31252
GLYMA_11G239700	0.000119756	down	KRH31284
GLYMA_11G240200	0.000759322	up	KRH31291
GLYMA_11G242100	1.45e-19	up	KRH31329	Gma.27128
GLYMA_11G243200	1.45e-19	up	KRH31344	Gma.23849
GLYMA_11G243300	0.00098722	down	KRH31345	Gma.12992
GLYMA_11G243400	1.16e-19	down	KRH31346	Gma.14100
GLYMA_11G243900	1.45e-19	up	KRH31354	Gma.35083
GLYMA_11G244000	7.35e-05	up	KRH31356
GLYMA_11G245400	1.16e-19	down	KRH31381	Gma.12488
GLYMA_11G247600	1.45e-19	up	KRH31426	Gma.55885
GLYMA_11G250600	1.16e-19	down	KRH31482
GLYMA_11G251100	1.16e-19	down	KRH31489	Gma.15583
GLYMA_11G252200	0.00213369	down	KRH31525	Gma.15855
GLYMA_11G253900	1.16e-19	down	KRH31558	Gma.55086
GLYMA_11G254900	1.16e-19	down	KRH31569	Gma.31454
GLYMA_11G255300	4.41e-05	down	KRH31574	Gma.60555
GLYMA_12G001000	4.95e-06	down	KRH23741
GLYMA_12G001800	0.000184035	down	KRH23752
GLYMA_12G003900	0.000350631	down	KRH23788
GLYMA_12G005200	1.16e-19	down	KRH23805
GLYMA_12G007000	1.22e-06	up	KRH23852
GLYMA_12G007200	1.45e-19	up	KRH23855	Gma.25763
GLYMA_12G008400	0.00012262	down	KRH23879
[truncated: 169 more rows]

## Sheet: Sheet2
Table S2. Gene ontology annotation of modules found by the tool DAVID of drought stress.
	GO ID	Term	Count	PValue	FDR	TAIR ID
Turquoise	GO:0009416	response to light stimulus	116	7.83851e-22	4.06622e-19	AT2G05070, AT1G37130, AT2G28190, AT1G01180, AT3G25730, AT5G48590, AT4G29070, AT1G60950, AT3G52950, AT1G76450, AT2G05100, AT3G47470, AT3G47070, AT5G17040, AT5G63180, AT1G06460, AT2G39010, AT3G21760, AT2G36145, AT1G52510, AT5G28450, AT1G74840, AT5G04140, AT1G52230, AT4G17340, AT4G32760, AT3G52840, AT1G07700, AT1G29910, AT3G49120, AT4G02920, AT5G22340, AT3G24420, AT4G26370, AT2G32390, AT2G39190, AT5…
	GO:0009768	photosynthesis, light harvesting in photosystem I	19	9.16849e-22	4.06622e-19	AT1G08380, AT2G34420, AT3G08940, AT2G34430, AT3G27690, AT2G05070, AT3G54890, AT1G15820, AT1G29920, AT1G29930, AT3G61470, AT5G28450, AT1G45474, AT2G40100, AT2G05100, AT3G47470, AT5G01530, AT1G29910, AT5G54270
	GO:0009765	photosynthesis, light harvesting	16	7.7745e-17	2.29866e-14	AT2G34420, AT2G34430, AT3G27690, AT2G05070, AT3G54890, AT1G15820, AT1G29920, AT1G29930, AT3G61470, AT1G45474, AT2G40100, AT2G05100, AT3G47470, AT5G01530, AT1G29910, AT5G54270
	GO:0015979	photosynthesis	32	7.32239e-16	1.62374e-13	AT2G34430, AT4G27600, AT1G77090, AT3G56650, AT2G06520, AT1G67740, AT1G68750, AT3G54050, AT3G21055, AT3G59780, AT1G31330, AT4G27440, AT2G30570, AT1G15820, AT2G30790, AT5G64040, AT4G15530, AT1G43670, AT1G03130, AT1G76450, AT1G74470, AT5G54190, AT1G03630, AT5G54270, AT3G05410, AT4G02770, AT1G06680, AT1G27730, AT5G13630, AT3G16140, AT1G52230, AT1G44575
	GO:0018298	protein-chromophore linkage	20	4.29804e-14	7.62473e-12	AT2G34420, AT3G08940, AT2G34430, AT3G27690, AT2G05070, AT3G54890, AT1G15820, AT1G68050, AT1G29920, AT1G29930, AT3G61470, AT5G28450, AT1G45474, AT2G40100, AT3G45780, AT2G05100, AT3G47470, AT5G01530, AT1G29910, AT5G54270
	GO:0042744	hydrogen peroxide catabolic process	22	1.35574e-10	2.00424e-08	AT3G49120, AT3G49110, AT3G32980, AT1G05260, AT3G49960, AT2G37130, AT5G64100, AT5G67400, AT3G21770, AT5G64120, AT5G64110, AT4G08780, AT4G08770, AT2G38380, AT2G38390, AT5G58400, AT5G58390, AT4G11290, AT5G39580, AT4G37520, AT2G41680, AT4G37530
	GO:0009642	response to light intensity	31	2.76901e-08	3.50873e-06	AT2G36895, AT3G32980, AT3G21670, AT3G21055, AT5G16400, AT1G75800, AT3G02730, AT2G44790, AT5G56870, AT3G62030, AT3G15480, AT5G08650, AT5G64840, AT1G78450, AT3G19800, AT5G52900, AT5G19120, AT3G04760, AT1G06460, AT4G00750, AT4G25290, AT4G27450, AT1G14345, AT1G73990, AT2G45630, AT5G13630, AT1G19000, AT1G50450, AT4G19420, AT5G19190, AT3G13750
	GO:0006979	response to oxidative stress	46	4.33875e-08	4.81058e-06	AT5G19230, AT1G14870, AT3G49120, AT3G32980, AT5G20140, AT3G49960, AT3G21690, AT2G28190, AT1G05260, AT1G64210, AT2G19810, AT5G64100, AT3G21770, AT5G64120, AT4G08780, AT2G44790, AT5G56870, AT3G62030, AT5G64940, AT2G38380, AT4G20830, AT5G58390, AT5G02230, AT2G28400, AT4G11290, AT4G37520, AT1G10140, AT1G63830, AT3G49110, AT5G43750, AT4G01720, AT1G80130, AT5G24770, AT2G37130, AT5G67400, AT5G64110, AT4…
	GO:0015994	chlorophyll metabolic process	14	4.96974e-08	4.89795e-06	AT1G06690, AT2G06520, AT4G27700, AT3G21055, AT1G31330, AT1G14345, AT1G31920, AT3G16140, AT2G21960, AT4G36390, AT1G03130, AT1G76450, AT1G22850, AT1G04620
	GO:0009645	response to low light intensity stimulus	10	1.46928e-07	1.30325e-05	AT3G27690, AT5G19140, AT2G05070, AT3G61470, AT3G54890, AT3G16140, AT1G45474, AT1G03130, AT2G05100, AT3G47470
	GO:0009769	photosynthesis, light harvesting in photosystem II	6	5.03048e-07	4.0564e-05	AT2G34420, AT2G34430, AT3G27690, AT2G05070, AT2G05100, AT5G54270
	GO:0009644	response to high light intensity	12	1.35364e-06	0.000100056	AT1G27730, AT3G27690, AT2G05070, AT3G61470, AT5G64940, AT3G54890, AT1G79600, AT1G45474, AT3G47860, AT2G05100, AT3G47470, AT5G54270
	GO:0048511	rhythmic process	9	1.35296e-05	0.000923137	AT5G08330, AT2G40080, AT5G60100, AT5G24470, AT2G37130, AT5G64120, AT2G46790, AT4G37520, AT1G68050
	GO:0051707	response to other organism	8	2.49372e-05	0.00157995	AT2G15490, AT5G61210, AT3G52430, AT4G34135, AT3G45140, AT2G15480, AT2G35980, AT4G34131
	GO:0071456	cellular response to hypoxia	24	7.83147e-05	0.00463101	AT1G10140, AT5G19230, AT3G56400, AT5G19120, AT1G35140, AT5G19240, AT3G02550, AT5G42200, AT5G27420, AT3G22550, AT4G27450, AT5G57220, AT1G27730, AT2G46400, AT2G16060, AT5G04340, AT5G06320, AT1G74940, AT4G38470, AT4G27280, AT1G72430, AT1G76680, AT4G34131, AT5G54490
	GO:0006633	fatty acid biosynthetic process	16	0.000101792	0.00564311	AT1G64400, AT5G67070, AT3G06470, AT3G06460, AT4G25050, AT3G16170, AT4G23850, AT5G48880, AT4G20870, AT2G34770, AT2G28630, AT1G76690, AT1G76680, AT3G45140, AT1G07720, AT4G11030
	GO:0042538	hyperosmotic salinity response	10	0.000321006	0.016749	AT3G03450, AT5G17490, AT5G67450, AT5G46830, AT1G05260, AT5G24770, AT2G39010, AT1G66350, AT4G32410, AT5G43170
	GO:0042440	pigment metabolic process	9	0.000348447	0.0171707	AT1G06690, AT3G16140, AT4G27700, AT1G17100, AT2G22800, AT1G03130, AT1G76450, AT1G22850, AT1G14345
	GO:0050482	arachidonic acid secretion	4	0.000547639	0.0255661	AT2G19690, AT4G29070, AT4G29470, AT4G29460
	GO:0006778	porphyrin-containing compound metabolic process	11	0.000685718	0.0304116	AT4G37330, AT1G52230, AT5G22340, AT1G76890, AT4G26140, AT2G42220, AT1G79790, AT2G27680, AT2G24395, AT4G38860, AT1G02475
	GO:0015995	chlorophyll biosynthetic process	10	0.000772001	0.0326078	AT5G13630, AT4G02920, AT3G59400, AT4G25080, AT1G74470, AT1G44446, AT4G27440, AT3G15520, AT5G54190, AT1G03630
	GO:0030388	fructose 1,6-bisphosphate metabolic process	5	0.00086537	0.0348902	AT4G26530, AT4G26520, AT1G43670, AT3G54050, AT3G55800
	GO:0031324	negative regulation of cellular metabolic process	9	0.000932306	0.0359546	AT5G13630, AT2G06520, AT3G16140, AT5G08650, AT4G17340, AT2G37450, AT1G31330, AT3G12345, AT1G02475
	GO:0009409	response to cold	31	0.00107018	0.0395521	AT5G67450, AT3G27690, AT2G05070, AT3G54890, AT1G05260, AT3G54050, AT1G17100, AT3G59780, AT1G45474, AT5G08650, AT1G78450, AT1G74070, AT2G05100, AT3G47470, AT1G23740, AT5G52370, AT4G21150, AT1G06460, AT2G39010, AT2G36145, AT2G39730, AT4G20260, AT3G08920, AT5G43170, AT1G27730, AT3G61470, AT5G13630, AT5G13650, AT3G16140, AT1G50450, AT1G07720
	GO:0005992	trehalose biosynthetic process	6	0.00131491	0.0466528	AT5G10100, AT5G51460, AT2G22190, AT4G39770, AT5G65140, AT4G17770
	GO:0071705	nitrogen compound transport	5	0.00164475	0.0561111	AT2G03600, AT1G26440, AT2G03520, AT2G03530, AT2G03590
	GO:0009767	photosynthetic electron transport chain	6	0.00199034	0.0638599	AT1G08380, AT4G27800, AT3G18890, AT1G74070, AT1G60950, AT4G23890
	GO:0090333	regulation of stomatal closure	7	0.00206833	0.0638599	AT3G56400, AT3G27690, AT2G05070, AT5G23060, AT3G59780, AT2G40750, AT2G05100
	GO:0071482	cellular response to light stimulus	8	0.00208786	0.0638599	AT1G07180, AT2G36390, AT1G64860, AT5G03650, AT1G70640, AT2G42750, AT3G59780, AT1G68010
	GO:1900056	negative regulation of leaf senescence	5	0.0021745	0.0642928	AT3G56400, AT2G20570, AT5G44190, AT2G40750, AT5G02760
	GO:0044255	cellular lipid metabolic process	18	0.00258426	0.0733372	AT5G47530, AT3G07310, AT2G36895, AT3G21690, AT4G25290, AT3G21670, AT3G59780, AT4G37320, AT4G18700, AT2G44790, AT4G15530, AT5G13630, AT1G20030, AT3G16140, AT3G45210, AT4G17790, AT1G76450, AT1G22850
	GO:0042343	indole glucosinolate metabolic process	4	0.00280928	0.0733372	AT4G37430, AT5G57220, AT4G37400, AT4G37410
	GO:0010196	nonphotochemical quenching	5	0.00281112	0.0733372	AT5G45680, AT1G74730, AT1G44575, AT3G15840, AT1G15820
	GO:0016104	triterpenoid biosynthetic process	5	0.00281112	0.0733372	AT1G78955, AT1G78960, AT1G66960, AT1G78970, AT1G78950
	GO:0046148	pigment biosynthetic process	7	0.00318809	0.078989	AT5G02580, AT5G46390, AT1G78450, AT5G05740, AT5G43745, AT1G64390, AT2G26340
	GO:0000226	microtubule cytoskeleton organization	9	0.00320587	0.078989	AT1G04820, AT5G44340, AT4G14960, AT1G50010, AT3G16800, AT1G54460, AT5G28646, AT3G04630, AT3G23090
	GO:0009704	de-etiolation	5	0.0035644	0.0854492	AT1G10370, AT4G37470, AT5G23060, AT3G59780, AT2G43010
	GO:0009607	response to biotic stimulus	6	0.00404934	0.0907624	AT2G17480, AT1G61560, AT5G65970, AT1G11310, AT2G17430, AT2G39200
	GO:0005978	glycogen biosynthetic process	4	0.00409301	0.0907624	AT2G36390, AT5G03650, AT4G39210, AT2G21590
	GO:1905582	response to mannose	4	0.00409301	0.0907624	AT3G63210, AT1G22160, AT1G19200, AT5G20700
	GO:0015720	allantoin transport	3	0.00438792	0.0926687	AT1G26440, AT2G03530, AT2G03590
	GO:0015857	uracil transport	3	0.00438792	0.0926687	AT1G26440, AT2G03530, AT2G03590
	GO:0042128	nitrate assimilation	7	0.00470699	0.0970953	AT5G37600, AT5G50950, AT1G37130, AT2G15620, AT1G77760, AT1G66200, AT3G21670
	GO:0006950	response to stress	9	0.00511548	0.103124	AT5G67450, AT1G05260, AT2G37130, AT5G64100, AT5G64120, AT3G21770, AT4G11290, AT5G64110, AT5G39580
	GO:0006833	water transport	6	0.00636233	0.125409	AT3G16240, AT3G25560, AT4G17340, AT2G39010, AT5G47450, AT3G54820
	GO:0006355	regulation of transcription, DNA-templated	81	0.00665331	0.128293	AT5G17490, AT1G08010, AT3G25730, AT5G65410, AT1G32640, AT2G18300, AT5G08330, AT4G29190, AT2G23290, AT2G40750, AT1G76890, AT4G34530, AT4G24660, AT3G56400, AT4G00870, AT1G34170, AT4G01720, AT1G35540, AT1G08000, AT1G68520, AT5G23280, AT1G34410, AT1G66140, AT1G29280, AT3G32090, AT2G38090, AT3G47500, AT5G28770, AT1G19000, AT1G73870, AT1G24625, AT3G46130, AT5G57150, AT2G22670, AT1G73805, AT3G02550, AT5…
	GO:0065003	macromolecular complex assembly	15	0.00689906	0.130201	AT5G22620, AT3G04860, AT4G02920, AT3G05625, AT4G37330, AT5G13630, AT1G50450, AT4G34138, AT3G06070, AT5G05740, AT2G27680, AT3G19800, AT5G02940, AT2G21370, AT2G26340
	GO:0009734	auxin-activated signaling pathway	18	0.00718184	0.132714	AT1G35240, AT1G34170, AT1G34390, AT1G59870, AT1G35540, AT1G34410, AT1G34310, AT1G35520, AT5G65670, AT4G23980, AT2G23810, AT5G63420, AT4G28050, AT5G37020, AT4G30430, AT2G28350, AT1G43950, AT2G22670
	GO:0006760	folic acid-containing compound metabolic process	3	0.00855026	0.143096	AT5G62980, AT3G11750, AT3G21730
	GO:1903428	positive regulation of reactive oxygen species biosynthetic process	3	0.00855026	0.143096	AT3G27690, AT2G05070, AT2G05100
	GO:0019419	sulfate reduction	3	0.00855026	0.143096	AT4G04610, AT1G62180, AT4G21990
	GO:0010597	green leaf volatile biosynthetic process	3	0.00855026	0.143096	AT4G37980, AT3G03480, AT3G45140
	GO:1900457	regulation of brassinosteroid mediated signaling pathway	3	0.00855026	0.143096	AT3G56400, AT2G46400, AT2G40750
	GO:0009737	response to abscisic acid	54	0.00893754	0.146807	AT5G17490, AT4G25620, AT1G80120, AT1G32640, AT4G15530, AT3G62030, AT5G61210, AT5G23810, AT5G54270, AT1G10140, AT3G51990, AT1G70640, AT5G62770, AT2G39010, AT4G22200, AT1G27730, AT2G44480, AT1G21670, AT3G63210, AT2G46820, AT4G15800, AT3G47860, AT3G15810, AT5G04500, AT5G49700, AT1G63840, AT3G57540, AT3G24420, AT3G21790, AT5G65310, AT1G66350, AT5G53160, AT2G17480, AT4G38470, AT1G20030, AT5G54530, AT1…
	GO:0042742	defense response to bacterium	59	0.00952359	0.15359	AT5G19230, AT3G05200, AT5G41680, AT3G52430, AT3G21690, AT4G01050, AT4G09890, AT4G37320, AT4G36550, AT5G57220, AT2G44790, AT4G36030, AT3G62030, AT1G19670, AT5G02230, AT2G40750, AT1G73260, AT2G29990, AT1G65930, AT3G56400, AT1G63830, AT3G49110, AT4G01720, AT5G50520, AT5G62770, AT2G37630, AT2G39730, AT5G66570, AT4G20260, AT2G44480, AT5G06320, AT5G55970, AT4G15800, AT3G15810, AT3G14200, AT4G37530, AT5…
	GO:0008610	lipid biosynthetic process	17	0.0102972	0.1631	AT3G25030, AT2G36895, AT1G34010, AT3G59780, AT4G20870, AT4G26140, AT5G47780, AT2G34770, AT4G18700, AT5G13630, AT3G16140, AT3G45210, AT5G02580, AT4G17790, AT1G76450, AT2G02780, AT1G22850
	GO:0019748	secondary metabolic process	25	0.0108328	0.168574	AT5G41680, AT3G21690, AT3G24420, AT5G62140, AT4G08780, AT3G21750, AT5G09640, AT4G15530, AT4G36030, AT4G15270, AT2G31945, AT4G19450, AT4G37520, AT5G19440, AT5G47530, AT4G27435, AT3G56360, AT4G26580, AT2G45750, AT4G17840, AT1G22180, AT5G03110, AT1G14390, AT5G45810, AT4G37530
	GO:0009725	response to hormone	5	0.011031	0.168698	AT1G34170, AT5G37020, AT2G18300, AT2G28350, AT4G23980
	GO:0010200	response to chitin	28	0.0120823	0.181645	AT5G19230, AT3G05200, AT5G49700, AT5G67450, AT4G25620, AT3G21150, AT1G32640, AT5G66200, AT2G17040, AT4G36550, AT4G37260, AT3G05490, AT2G28400, AT5G59780, AT3G16510, AT3G56400, AT2G31230, AT1G63830, AT5G19240, AT1G59870, AT5G27420, AT5G62770, AT5G43170, AT1G27730, AT2G46400, AT4G15800, AT2G42760, AT1G02310
	GO:2000033	regulation of seed dormancy process	4	0.0124113	0.18348	AT3G03450, AT5G17490, AT1G66350, AT2G15230
	GO:0009740	gibberellic acid mediated signaling pathway	9	0.0131511	0.188952	AT3G03450, AT5G17490, AT4G24210, AT1G10588, AT2G39540, AT5G59845, AT1G66350, AT2G18300, AT2G15230
	GO:0001666	response to hypoxia	11	0.0132074	0.188952	AT1G10140, AT1G35140, AT4G26520, AT5G56870, AT4G25620, AT2G16060, AT3G52430, AT3G24420, AT2G31945, AT4G27450, AT1G23730
	GO:0006094	gluconeogenesis	5	0.0148257	0.208737	AT4G26530, AT4G26520, AT1G43670, AT3G54050, AT3G55800
	GO:0006644	phospholipid metabolic process	4	0.0153476	0.212709	AT2G19690, AT4G29070, AT4G29470, AT4G29460
	GO:0019252	starch biosynthetic process	6	0.0167338	0.224893	AT3G16000, AT2G36390, AT5G03650, AT4G39210, AT3G55800, AT2G21590
	GO:0000413	protein peptidyl-prolyl isomerization	6	0.0167338	0.224893	AT5G45680, AT3G62030, AT3G25230, AT1G74070, AT5G48570, AT3G15520
	GO:0009269	response to desiccation	5	0.016996	0.225007	AT3G27690, AT2G05070, AT1G05260, AT1G32640, AT2G05100
	GO:0007005	mitochondrion organization	6	0.0185313	0.236207	AT4G28510, AT5G44140, AT2G20530, AT3G23990, AT1G11870, AT1G03860
	GO:0009744	response to sucrose	8	0.0185621	0.236207	AT4G34590, AT3G63210, AT5G04140, AT1G22160, AT1G19200, AT5G20700, AT3G22550, AT3G47340
	GO:1901141	regulation of lignin biosynthetic process	4	0.0186409	0.236207	AT3G16340, AT1G66230, AT5G49660, AT5G16600
	GO:0014070	response to organic cyclic compound	16	0.0200291	0.250038	AT4G23470, AT5G50520, AT4G09890, AT3G62370, AT2G44790, AT5G56870, AT2G44480, AT5G36220, AT3G15480, AT5G02230, AT3G05490, AT1G78460, AT2G28400, AT2G29720, AT3G16510, AT1G78040
	GO:0046656	folic acid biosynthetic process	3	0.0202962	0.250038	AT5G62980, AT3G11750, AT3G21730
	GO:0010017	red or far-red light signaling pathway	5	0.0219055	0.262561	AT2G40080, AT3G21150, AT2G46790, AT2G46340, AT2G43010
	GO:0043085	positive regulation of catalytic activity	4	0.022294	0.262561	AT3G59400, AT5G16400, AT3G02730, AT2G41680
	GO:0009938	negative regulation of gibberellic acid mediated signaling pathway	4	0.022294	0.262561	AT3G03450, AT5G17490, AT4G24210, AT1G66350
	GO:2000652	regulation of secondary cell wall biogenesis	6	0.0224968	0.262561	AT3G06035, AT1G32640, AT1G66230, AT5G49660, AT5G16600, AT4G17880
	GO:0010015	root morphogenesis	24	0.0232339	0.266966	AT4G23470, AT5G47530, AT1G10020, AT1G60050, AT5G24100, AT3G32980, AT5G41680, AT1G80120, AT3G51990, AT3G25730, AT1G29020, AT4G26140, AT3G04630, AT1G29280, AT3G63470, AT2G45750, AT2G44790, AT4G25090, AT1G19000, AT5G02580, AT3G06070, AT1G05320, AT2G25160, AT4G37530
	GO:0010114	response to red light	9	0.0234762	0.266966	AT2G32560, AT2G40080, AT3G27690, AT2G05070, AT1G79600, AT5G24470, AT2G05100, AT2G46340, AT3G21730
	GO:0009639	response to red or far red light	13	0.0241646	0.271317	AT4G25290, AT5G62140, AT3G21670, AT2G22800, AT1G52510, AT4G37330, AT5G13630, AT3G45210, AT5G64840, AT5G02230, AT1G03130, AT3G19800, AT4G38860
	GO:0010218	response to far red light	6	0.0246702	0.272645	AT3G27690, AT2G05070, AT5G24470, AT2G05100, AT4G14130, AT2G46340
	GO:0006631	fatty acid metabolic process	9	0.0248976	0.272645	AT1G64400, AT3G25030, AT3G16170, AT4G20870, AT4G23850, AT4G05530, AT4G15440, AT2G34770, AT4G11030
	GO:0010380	regulation of chlorophyll biosynthetic process	4	0.0263074	0.281141	AT2G20570, AT2G35260, AT5G44190, AT2G41680
	GO:0009750	response to fructose	4	0.0263074	0.281141	AT1G29920, AT1G43670, AT3G47340, AT1G29910
	GO:0019464	glycine decarboxylation via glycine cleavage system	3	0.0276915	0.29241	AT1G32470, AT2G35370, AT1G11860
	GO:0009658	chloroplast organization	15	0.0302809	0.31599	AT4G04850, AT5G44190, AT1G11870, AT4G20360, AT2G36000, AT3G63140, AT2G20570, AT3G57190, AT5G62430, AT1G79600, AT4G38470, AT5G63420, AT1G44000, AT4G39460, AT2G46340
	GO:0009738	abscisic acid-activated signaling pathway	18	0.030654	0.316164	AT5G52900, AT1G67800, AT5G01810, AT5G67450, AT5G22460, AT4G27920, AT1G32640, AT5G65310, AT1G66140, AT5G46790, AT5G53160, AT4G37790, AT2G22430, AT1G42550, AT1G24625, AT2G28350, AT4G17870, AT1G02310
	GO:0044283	small molecule biosynthetic process	6	0.0319811	0.32606	AT2G26500, AT5G04440, AT3G21690, AT1G78450, AT3G21670, AT3G05625
	GO:0009773	photosynthetic electron transport in photosystem I	4	0.0354093	0.350761	AT2G46820, AT3G54050, AT1G18730, AT5G64040
	GO:0071329	cellular response to sucrose stimulus	3	0.0359856	0.350761	AT2G36390, AT2G28190, AT5G03650
	GO:0042549	photosystem II stabilization	3	0.0359856	0.350761	AT5G66570, AT2G30570, AT3G50820
	GO:0009759	indole glucosinolate biosynthetic process	3	0.0359856	0.350761	AT5G57220, AT3G56400, AT1G32640
	GO:0080163	regulation of protein serine/threonine phosphatase activity	4	0.0404904	0.386182	AT5G53160, AT4G27920, AT5G46790, AT4G17870
	GO:0008356	asymmetric cell division	4	0.0404904	0.386182	AT2G02080, AT1G14580, AT4G28100, AT2G37630
	GO:0009749	response to glucose	6	0.0436379	0.40729	AT3G63210, AT1G22160, AT1G19200, AT5G20700, AT3G22550, AT3G47340
	GO:0000741	karyogamy	3	0.0450978	0.40729	AT1G31470, AT1G76110, AT2G20585
	GO:0030104	water homeostasis	3	0.0450978	0.40729	AT3G27690, AT2G05070, AT2G05100
	GO:0019344	cysteine biosynthetic process	4	0.0459177	0.40729	AT4G04610, AT3G62030, AT1G62180, AT4G21990
	GO:0019684	photosynthesis, light reaction	4	0.0459177	0.40729	AT1G06680, AT1G06460, AT5G66570, AT3G50820
	GO:0019253	reductive pentose-phosphate cycle	4	0.0459177	0.40729	AT2G45290, AT3G54050, AT3G60750, AT3G55800
	GO:0006863	purine nucleobase transport	4	0.0459177	0.40729	AT2G33750, AT1G28220, AT1G28230, AT2G24220
red	GO:0071704	organic substance metabolic process	5	3.94731e-07	8.32883e-05	AT3G26140, AT3G26130, AT1G13130, AT5G17500, AT5G16700
	GO:0000028	ribosomal small subunit assembly	6	1.42661e-06	0.000150507	AT5G63070, AT5G09510, AT5G09500, AT5G43640, AT1G04270, AT5G09490
	GO:0016311	dephosphorylation	6	1.10698e-05	0.000778576	AT1G60140, AT5G50400, AT1G23870, AT5G24780, AT1G70290, AT4G24890
	GO:0042273	ribosomal large subunit biogenesis	4	0.000414339	0.0218564	AT1G07070, AT3G55750, AT1G41880, AT1G74270
	GO:0071310	cellular response to organic substance	7	0.000524997	0.0221549	AT4G02200, AT3G13275, AT2G12400, AT4G25160, AT5G61560, AT2G17760, AT5G62150
	GO:0010035	response to inorganic substance	13	0.000729214	0.025644	AT1G04170, AT3G53430, AT5G61560, AT5G62890, AT2G22795, AT1G74790, AT3G13275, AT3G20000, AT5G60670, AT1G54220, AT2G24550, AT3G13930, AT1G02750
	GO:0070413	trehalose metabolism in response to stress	3	0.00102505	0.0270357	AT1G60140, AT1G23870, AT1G70290
	GO:0045903	positive regulation of translational fidelity	3	0.00102505	0.0270357	AT1G04170, AT4G18330, AT2G18720
	GO:0006412	translation	15	0.00134426	0.0315155	AT5G63070, AT1G07070, AT5G43640, AT1G04270, AT3G55750, AT3G53430, AT2G18720, AT5G09490, AT1G33850, AT5G09510, AT5G09500, AT5G60670, AT2G37190, AT1G41880, AT1G74270
	GO:0009423	chorismate biosynthetic process	3	0.00155496	0.0328097	AT2G45300, AT1G48860, AT1G22410
	GO:0001731	formation of translation preinitiation complex	3	0.00185934	0.0356655	AT1G04170, AT4G18330, AT2G18720
	GO:0009620	response to fungus	8	0.00218532	0.0384252	AT4G02200, AT4G25433, AT4G31510, AT1G13360, AT3G62660, AT5G61560, AT2G17760, AT2G24550
	GO:0002181	cytoplasmic translation	4	0.00268349	0.0435551	AT1G07070, AT3G55750, AT1G41880, AT1G74270
	GO:0009073	aromatic amino acid family biosynthetic process	3	0.00333299	0.0502328	AT2G45300, AT1G48860, AT1G22410
	GO:0009773	photosynthetic electron transport in photosystem I	3	0.0046993	0.061972	AT4G11960, AT2G05620, AT4G22890
	GO:0048574	long-day photoperiodism, flowering	3	0.0046993	0.061972	AT2G46830, AT1G01060, AT5G37770
	GO:0005992	trehalose biosynthetic process	3	0.00628116	0.0779603	AT1G60140, AT1G23870, AT1G70290
	GO:0016567	protein ubiquitination	10	0.00743892	0.0872007	AT4G09130, AT5G61550, AT4G25160, AT5G61560, AT4G09100, AT2G35000, AT5G51270, AT2G34990, AT4G09120, AT4G09110
	GO:0010243	response to organonitrogen compound	6	0.00905885	0.0989278	AT1G23870, AT2G46830, AT4G31510, AT2G12400, AT1G27290, AT1G70290
	GO:0008652	cellular amino acid biosynthetic process	3	0.00937704	0.0989278	AT2G45300, AT1G48860, AT1G22410
	GO:0018920	glyphosate metabolic process	2	0.0108207	0.0999897	AT2G45300, AT1G48860
	GO:0080164	regulation of nitric oxide metabolic process	2	0.0108207	0.0999897	AT1G66400, AT5G37770
	GO:0009642	response to light intensity	6	0.0108994	0.0999897	AT1G23870, AT1G56220, AT3G62650, AT5G52420, AT1G70290, AT3G24190
	GO:0042754	negative regulation of circadian rhythm	2	0.0161874	0.136622	AT2G46830, AT1G01060
	GO:0046203	spermidine catabolic process	2	0.0161874	0.136622	AT2G43020, AT3G59050
	GO:0045489	pectin biosynthetic process	3	0.0228043	0.185065	AT1G02720, AT3G62660, AT4G02130
	GO:0007623	circadian rhythm	4	0.0242333	0.188735	AT5G64170, AT2G46830, AT1G01060, AT5G58140
	GO:0006598	polyamine catabolic process	2	0.0268344	0.188735	AT2G43020, AT3G59050
	GO:0046208	spermine catabolic process	2	0.0268344	0.188735	AT2G43020, AT3G59050
	GO:0006882	cellular zinc ion homeostasis	2	0.0268344	0.188735	AT3G51860, AT2G38170
	GO:0097305	response to alcohol	4	0.0300573	0.204583	AT4G02200, AT1G74790, AT2G24550, AT1G02750
	GO:1901701	cellular response to oxygen-containing compound	7	0.0339114	0.22307	AT4G02200, AT4G31510, AT2G12400, AT5G61560, AT2G17760, AT1G70290, AT1G02750
	GO:0046686	response to cadmium ion	6	0.0348877	0.22307	AT5G42020, AT2G05710, AT3G25230, AT2G45290, AT5G26220, AT3G60750
	GO:0009737	response to abscisic acid	11	0.0402052	0.246399	AT4G25433, AT3G13275, AT1G13360, AT2G05710, AT2G12400, AT2G16850, AT5G37770, AT5G61560, AT1G27290, AT1G70290, AT4G35100
	GO:0044281	small molecule metabolic process	5	0.0408719	0.246399	AT1G74790, AT1G13360, AT1G07010, AT5G61560, AT2G17760
	GO:0006751	glutathione catabolic process	2	0.0425909	0.24963	AT4G31290, AT5G26220
	GO:0006090	pyruvate metabolic process	2	0.0477867	0.272513	AT1G54220, AT3G13930
pink	GO:0098869	cellular oxidant detoxification	4	3.80722e-06	0.00041118	AT3G49580, AT5G24655, AT3G49570, AT5G24660
	GO:0019310	inositol catabolic process	3	1.55154e-05	0.00083783	AT5G56640, AT2G19800, AT4G26260
	GO:0010438	cellular response to sulfur starvation	3	0.00016927	0.00609371	AT3G49580, AT3G49570, AT5G24660
	GO:0006949	syncytium formation	3	0.000268463	0.0072485	AT5G56640, AT2G19800, AT4G26260
	GO:0019853	L-ascorbic acid biosynthetic process	3	0.000533624	0.0115263	AT5G56640, AT2G19800, AT4G26260
	GO:0009651	response to salt stress	6	0.00195399	0.0351718	AT3G49580, AT3G49570, AT5G37540, AT5G24660, AT3G06590, AT1G73500
	GO:0009251	glucan catabolic process	2	0.0129828	0.200307	AT5G20950, AT5G20940
	GO:0009875	pollen-pistil interaction	2	0.0162028	0.218738	AT1G18350, AT1G73500
	GO:0010100	negative regulation of photomorphogenesis	2	0.0242082	0.290498	AT2G21320, AT4G38960
yellow	GO:0019438	aromatic compound biosynthetic process	11	2.43469e-16	9.59269e-14	AT1G77530, AT1G21120, AT1G21130, AT1G77520, AT1G62900, AT1G76790, AT1G63140, AT1G21100, AT1G21110, AT5G37170, AT5G53810
	GO:0009972	cytidine deamination	9	1.16749e-15	2.29996e-13	AT2G19570, AT4G29610, AT4G29600, AT4G29580, AT4G29570, AT4G29630, AT4G29620, AT4G29650, AT4G29640
	GO:0009696	salicylic acid metabolic process	11	4.24055e-15	5.56926e-13	AT2G23620, AT5G10300, AT4G37150, AT2G23600, AT2G23610, AT2G23590, AT3G10870, AT2G23550, AT2G23560, AT2G23570, AT2G23580
	GO:0009694	jasmonic acid metabolic process	11	3.82954e-14	3.7721e-12	AT2G23620, AT5G10300, AT4G37150, AT2G23600, AT2G23610, AT2G23590, AT3G10870, AT2G23550, AT2G23560, AT2G23570, AT2G23580
	GO:0016042	lipid catabolic process	16	4.30177e-10	3.3898e-08	AT1G59030, AT4G00240, AT4G29470, AT4G29460, AT1G59406, AT5G42170, AT1G75900, AT1G58725, AT2G19690, AT1G75890, AT3G43570, AT1G75880, AT3G43550, AT1G20120, AT3G14820, AT2G42010
	GO:0051131	chaperone-mediated protein complex assembly	5	7.85813e-06	0.000516017	AT5G56010, AT1G62740, AT4G12400, AT1G12270, AT5G56030
	GO:0034605	cellular response to heat	7	3.55514e-05	0.00200104	AT5G56010, AT5G07350, AT5G56000, AT3G08970, AT5G61780, AT5G56030, AT2G30250
	GO:0006629	lipid metabolic process	11	5.76339e-05	0.00283847	AT1G10670, AT3G48080, AT3G24480, AT3G48090, AT1G20130, AT1G75890, AT1G75880, AT1G20132, AT1G59406, AT1G75900, AT1G60810
	GO:0032259	methylation	12	6.70462e-05	0.00293513	AT1G77530, AT1G21120, AT1G21130, AT1G77520, AT1G62900, AT1G76790, AT1G63140, AT1G21100, AT1G21110, AT5G37170, AT5G53810, AT4G26220
	GO:0051607	defense response to virus	6	0.000212447	0.00837041	AT5G06320, AT2G19810, AT3G11650, AT2G22240, AT2G35980, AT3G11410
	GO:0045332	phospholipid translocation	4	0.000234284	0.00839164	AT1G13210, AT1G68710, AT1G26130, AT3G25610
	GO:0030968	endoplasmic reticulum unfolded protein response	5	0.000480039	0.0157613	AT5G07340, AT2G02810, AT1G14360, AT2G45070, AT5G61790
	GO:0009627	systemic acquired resistance	7	0.000850806	0.025786	AT2G23620, AT4G15610, AT3G48080, AT3G48090, AT4G37150, AT2G29720, AT2G23560
	GO:0009751	response to salicylic acid	12	0.000941963	0.0265095	AT1G52565, AT4G15610, AT5G08790, AT3G15760, AT5G06320, AT1G14790, AT5G42830, AT2G29720, AT2G23450, AT4G13340, AT1G13960, AT2G24240
	GO:0050482	arachidonic acid secretion	3	0.00107463	0.0282271	AT2G19690, AT4G29470, AT4G29460
	GO:0006021	inositol biosynthetic process	3	0.00160079	0.0394195	AT4G39800, AT5G10170, AT2G22240
	GO:0006457	protein folding	8	0.00177563	0.0411529	AT5G07340, AT5G56010, AT3G12050, AT5G56000, AT3G62600, AT5G61790, AT2G47470, AT5G56030
	GO:0042742	defense response to bacterium	23	0.00270564	0.0592235	AT3G48080, AT1G73805, AT4G31500, AT3G54040, AT5G67330, AT1G52565, AT1G52720, AT4G15610, AT3G15760, AT5G06320, AT2G27830, AT2G23150, AT3G52710, AT5G28830, AT5G42830, AT2G29720, AT2G22240, AT2G23450, AT2G40095, AT4G13340, AT5G56030, AT2G24240, AT2G42010
	GO:0006616	SRP-dependent cotranslational protein targeting to membrane, translocation	3	0.00566972	0.111693	AT1G78720, AT3G60540, AT2G45070
	GO:0031204	posttranslational protein targeting to membrane, translocation	3	0.00566972	0.111693	AT1G78720, AT3G60540, AT2G45070
	GO:0006541	glutamine metabolic process	4	0.00734979	0.137896	AT5G10240, AT5G60540, AT5G65010, AT3G24090
	GO:1901703	protein localization involved in auxin polar transport	3	0.00918848	0.150844	AT1G13210, AT1G68710, AT3G25610
	GO:0006644	phospholipid metabolic process	3	0.00918848	0.150844	AT2G19690, AT4G29470, AT4G29460
	GO:0046513	ceramide biosynthetic process	3	0.00918848	0.150844	AT1G26200, AT1G13580, AT3G25540
	GO:0008361	regulation of cell size	3	0.0105293	0.165941	AT5G08790, AT1G66740, AT5G38110
	GO:0034976	response to endoplasmic reticulum stress	4	0.0110206	0.167005	AT4G14420, AT2G41490, AT3G60540, AT2G47470
	GO:0051592	response to calcium ion	3	0.0134514	0.189281	AT4G30960, AT4G36070, AT2G17890
	GO:0015914	phospholipid transport	3	0.0134514	0.189281	AT1G13210, AT1G68710, AT1G26130
	GO:0071456	cellular response to hypoxia	8	0.0145666	0.197904	AT4G11660, AT3G24715, AT5G06320, AT1G19020, AT2G36800, AT5G63790, AT2G15890, AT2G36220
	GO:0031567	mitotic cell size control checkpoint	2	0.0208844	0.257139	AT1G66740, AT5G38110
	GO:0006772	thiamine metabolic process	2	0.0208844	0.257139	AT2G44750, AT1G02880
	GO:0006489	dolichyl diphosphate biosynthetic process	2	0.0208844	0.257139	AT2G41490, AT3G57220
	GO:0018105	peptidyl-serine phosphorylation	5	0.0226215	0.270087	AT3G20410, AT4G36070, AT5G66210, AT1G50700, AT2G17890
	GO:0051707	response to other organism	3	0.0260192	0.301516	AT5G61210, AT2G35980, AT3G53160
	GO:1901565	organonitrogen compound catabolic process	6	0.0277389	0.30742	AT4G14420, AT2G41490, AT5G07340, AT2G03340, AT5G61790, AT2G23450
	GO:1990110	callus formation	3	0.0280891	0.30742	AT1G21120, AT2G29720, AT1G21110
	GO:0070981	L-asparagine biosynthetic process	2	0.0311632	0.314828	AT5G10240, AT5G65010
	GO:0010372	positive regulation of gibberellin biosynthetic process	2	0.0311632	0.314828	AT5G07350, AT5G61780
	GO:2000379	positive regulation of reactive oxygen species metabolic process	2	0.0311632	0.314828	AT2G23150, AT5G67330
	GO:0009793	embryo development ending in seed dormancy	13	0.0327833	0.322916	AT3G54720, AT2G15890, AT5G56890, AT5G08790, AT4G37140, AT4G39800, AT5G60540, AT1G50450, AT3G46560, AT5G10170, AT2G47470, AT1G01225, AT2G22240
	GO:0045087	innate immune response	5	0.0350081	0.336419	AT2G23620, AT5G56010, AT4G37150, AT2G23560, AT5G56030
	GO:0008654	phospholipid biosynthetic process	3	0.0393649	0.36928	AT4G39800, AT5G10170, AT2G22240
	GO:0006335	DNA replication-dependent nucleosome assembly	2	0.0413344	0.370131	AT1G66740, AT5G38110
	GO:0006529	asparagine biosynthetic process	2	0.0413344	0.370131	AT5G10240, AT5G65010
	GO:0050821	protein stabilization	3	0.0442793	0.38769	AT5G56010, AT5G56000, AT5G56030
	GO:0009958	positive gravitropism	3	0.0494074	0.413293	AT5G67440, AT4G37590, AT2G23050
green	GO:0009734	auxin-activated signaling pathway	10	1.73378e-05	0.00553077	AT1G35240, AT1G34170, AT1G34390, AT1G35540, AT2G38120, AT1G34410, AT1G35520, AT1G34310, AT1G43950, AT4G23980
	GO:0019419	sulfate reduction	3	0.000248377	0.026946	AT4G04610, AT1G62180, AT4G21990
	GO:0015979	photosynthesis	7	0.000253411	0.026946	AT3G56940, AT4G15510, AT4G17600, AT1G55480, AT5G47110, AT1G14150, AT5G27390
	GO:0030245	cellulose catabolic process	4	0.000776682	0.0508392	AT5G49720, AT4G24260, AT4G11050, AT1G64390
	GO:0015995	chlorophyll biosynthetic process	5	0.000796852	0.0508392	AT3G56940, AT1G09940, AT2G20180, AT1G58290, AT2G31250
	GO:0009416	response to light stimulus	18	0.00106708	0.0567328	AT2G14910, AT3G52470, AT3G54400, AT1G55480, AT2G35960, AT2G28190, AT2G17972, AT3G60520, AT3G19820, AT1G31920, AT1G01250, AT1G21350, AT3G61870, AT1G78460, AT1G58290, AT2G23670, AT2G41250, AT4G33110
	GO:0046148	pigment biosynthetic process	4	0.00190754	0.0869295	AT3G52470, AT1G78450, AT1G64390, AT4G33110
	GO:0006783	heme biosynthetic process	3	0.00264058	0.0960138	AT1G09940, AT2G20180, AT1G58290
	GO:0006355	regulation of transcription, DNA-templated	21	0.00270885	0.0960138	AT1G35240, AT1G34170, AT1G34390, AT4G28800, AT1G35540, AT5G23280, AT1G34410, AT4G28790, AT1G34310, AT1G72830, AT1G35520, AT4G23980, AT5G08330, AT2G22750, AT4G17600, AT2G23760, AT1G01250, AT2G20180, AT1G43950, AT4G37850, AT4G36870
	GO:0048316	seed development	10	0.00457533	0.136885	AT3G12390, AT3G06530, AT4G28811, AT3G14020, AT5G15200, AT1G01080, AT1G54160, AT1G29050, AT5G66560, AT1G50920
	GO:0006782	protoporphyrinogen IX biosynthetic process	3	0.00472017	0.136885	AT1G09940, AT1G58290, AT2G31250
	GO:0009901	anther dehiscence	3	0.00808709	0.188385	AT1G72520, AT2G22125, AT1G17420
	GO:0019344	cysteine biosynthetic process	3	0.00808709	0.188385	AT4G04610, AT1G62180, AT4G21990
	GO:0006779	porphyrin-containing compound biosynthetic process	3	0.00885823	0.188385	AT1G09940, AT1G58290, AT2G31250
	GO:0000103	sulfate assimilation	3	0.00885823	0.188385	AT4G04610, AT1G62180, AT4G21990
	GO:0006094	gluconeogenesis	3	0.0113592	0.226474	AT2G21330, AT2G21170, AT4G38970
	GO:1904964	positive regulation of phytol biosynthetic process	2	0.0129252	0.242538	AT4G17600, AT5G47110
	GO:0006730	one-carbon metabolic process	3	0.0204512	0.342586	AT1G22020, AT1G36370, AT3G10160
	GO:0009832	plant-type cell wall biogenesis	4	0.0239621	0.342586	AT4G00770, AT4G12730, AT1G64390, AT1G78040
	GO:0006612	protein targeting to membrane	3	0.0239749	0.342586	AT3G12390, AT5G13850, AT1G69420
	GO:0048363	mucilage pectin metabolic process	2	0.0256845	0.342586	AT2G23760, AT4G36870
	GO:1904966	positive regulation of vitamin E biosynthetic process	2	0.0256845	0.342586	AT4G17600, AT5G47110
	GO:0042744	hydrogen peroxide catabolic process	4	0.0259664	0.342586	AT3G49960, AT5G67400, AT4G37520, AT4G37530
	GO:0048589	developmental growth	10	0.0260378	0.342586	AT1G79920, AT3G52470, AT3G54400, AT4G12730, AT5G67400, AT1G78460, AT5G66560, AT1G64390, AT1G78040, AT4G37530
	GO:0071554	cell wall organization or biogenesis	5	0.0268484	0.342586	AT3G52470, AT3G54400, AT3G55420, AT3G25400, AT1G29050
	GO:0009826	unidimensional cell growth	5	0.0287354	0.352561	AT3G19820, AT5G05690, AT4G12730, AT5G49720, AT1G78460
	GO:0034440	lipid oxidation	2	0.0382799	0.430677	AT1G72520, AT1G17420
	GO:0015994	chlorophyll metabolic process	3	0.0432879	0.430677	AT1G31920, AT3G61870, AT2G23670
	GO:0046655	folic acid metabolic process	2	0.0445169	0.430677	AT1G22020, AT1G36370
	GO:1902326	positive regulation of chlorophyll biosynthetic process	2	0.0445169	0.430677	AT4G17600, AT5G47110
	GO:0006565	L-serine catabolic process	2	0.0445169	0.430677	AT1G22020, AT1G36370
	GO:0019264	glycine biosynthetic process from serine	2	0.0445169	0.430677	AT1G22020, AT1G36370
	GO:0098542	defense response to other organism	10	0.0445528	0.430677	AT3G04770, AT5G46430, AT3G23390, AT3G27850, AT1G57660, AT5G27850, AT2G42710, AT1G57860, AT5G07090, AT5G56710, AT3G27830, AT5G66860, AT2G19730, AT4G26230, AT5G61170, AT1G27400, AT4G14320, AT2G17360, AT1G72370, AT2G39590, AT5G35530, AT5G62300, AT5G02870, AT3G02080, AT3G45030, AT2G20060, AT3G47370, AT4G34670, AT4G18100, AT3G10950, AT1G09690, AT1G09590, AT3G09630, AT3G05590, AT3G53870, AT2G31610, AT1…
brown	GO:0006412	translation	45	2.9108e-11	1.34479e-08	AT2G44120, AT4G25730, AT3G13580, AT2G01250, AT5G14520, AT3G18600
	GO:0000463	maturation of LSU-rRNA from tricistronic rRNA transcript (SSU-rRNA, 5.8S rRNA, LSU-rRNA)	6	4.96931e-06	0.00114791	AT5G22140, AT5G27850, AT5G07090, AT5G15870, AT1G67000, AT5G61790, AT3G21870, AT5G07340, AT2G17360, AT1G16080, AT3G17840, AT5G02050, AT5G01260, AT5G62300, AT1G73760, AT5G02870, AT4G34670, AT1G09690, AT1G09590, AT5G66170, AT3G09630, AT1G57770, AT2G44120, AT3G20000, AT3G05060, AT2G01250
	GO:0010035	response to inorganic substance	26	4.66339e-05	0.00718161	AT1G27400, AT3G04770, AT1G72370, AT1G67430, AT5G56710, AT2G19740, AT4G26230
	GO:0002181	cytoplasmic translation	7	7.29783e-05	0.00842899	AT2G03090, AT3G45970, AT3G45960, AT1G26770, AT1G69530, AT4G38400
	GO:0009828	plant-type cell wall loosening	6	0.00015177	0.0140235	AT4G25630, AT5G52470, AT5G52490
	GO:0000494	box C/D snoRNA 3'-end processing	3	0.000571935	0.0377477	AT4G25630, AT5G52470, AT5G52490
	GO:1990258	histone glutamine methylation	3	0.000571935	0.0377477	AT4G25630, AT4G25730, AT5G52470, AT5G52490
	GO:0031167	rRNA methylation	4	0.00106771	0.0550642	AT3G05060, AT1G42440, AT5G27120, AT1G06720, AT5G27140, AT2G37990
	GO:0042254	ribosome biogenesis	6	0.00107268	0.0550642	AT3G04770, AT1G72370, AT5G15520, AT3G02080, AT5G61170
	GO:0000028	ribosomal small subunit assembly	5	0.00151651	0.0700626	AT1G79530, AT1G16300, AT1G44800
	GO:0080144	amino acid homeostasis	3	0.00187158	0.0786062	AT1G71690, AT1G75500, AT5G05170, AT5G44030, AT2G28315, AT1G33800, AT4G09990
	GO:0009834	plant-type secondary cell wall biogenesis	7	0.0061635	0.237295	AT4G25100, AT1G05260, AT2G15760, AT5G15870, AT1G67000, AT3G21770, AT5G19875, AT2G19310, AT5G56550, AT3G45640, AT1G71695, AT3G15360, AT3G06590, AT4G11290, AT1G75280
	GO:0006979	response to oxidative stress	15	0.00736002	0.261564	AT5G08740, AT5G48950, AT1G48320
	GO:0042372	phylloquinone biosynthetic process	3	0.00804369	0.265442	AT2G22950, AT4G35920, AT4G37640, AT2G17780
	GO:0070588	calcium ion transmembrane transport	4	0.0115623	0.349366	AT1G75500, AT2G03090, AT3G45970, AT3G45960, AT1G26770, AT1G69530, AT4G38400, AT5G54380
	GO:0009826	unidimensional cell growth	8	0.0124416	0.349366	AT1G62740, AT4G12400, AT1G12270
	GO:0051131	chaperone-mediated protein complex assembly	3	0.0135648	0.349366	AT1G66920, AT1G66910, AT1G18390, AT1G66930, AT5G38240, AT5G27450, AT4G18250, AT5G39030, AT5G38250, AT5G39020
	GO:0016310	phosphorylation	10	0.0136116	0.349366	AT4G04940, AT4G25630, AT4G25730, AT1G63980, AT1G77030, AT2G20490, AT5G52470
	GO:0006364	rRNA processing	7	0.016993	0.401945	AT2G03090, AT1G26770, AT1G69530
	GO:0006949	syncytium formation	3	0.0179301	0.401945	AT4G25100, AT1G62740, AT1G74560, AT5G56550, AT3G09630, AT4G02930, AT5G02050, AT1G07440, AT3G02530, AT1G75280, AT3G18190
	GO:0046686	response to cadmium ion	11	0.0182702	0.401945	AT4G25100, AT4G02630, AT1G18330, AT5G02120, AT2G41310, AT3G57040
	GO:0007623	circadian rhythm	6	0.0215776	0.453129	AT4G00400, AT2G47240, AT1G01610
	GO:0010143	cutin biosynthetic process	3	0.0254233	0.490323	AT5G07340, AT1G80030, AT5G61790, AT3G02530, AT2G19310, AT5G16070, AT3G18190
	GO:0006457	protein folding	7	0.027341	0.490323	AT3G15354, AT5G08740, AT2G42750, AT1G08540
	GO:0071482	cellular response to light stimulus	4	0.0274724	0.490323	AT3G49670, AT5G65700
	GO:0010480	microsporocyte differentiation	2	0.0275939	0.490323	AT4G25630, AT4G25730, AT5G52470
	GO:0001510	RNA methylation	3	0.0339584	0.581066	AT3G15360, AT4G16155, AT3G16950, AT3G26060
	GO:0045454	cell redox homeostasis	4	0.0373701	0.602751	AT1G66920, AT1G66910, AT3G49670, AT1G66930, AT1G67000, AT1G48480, AT1G70250, AT3G17840, AT3G15354, AT1G18390, AT3G45640, AT5G65700, AT5G38240, AT4G18250, AT2G42880, AT5G39030, AT5G38260, AT5G38250, AT5G39020, AT5G38280, AT1G53090
	GO:0006468	protein phosphorylation	21	0.037835	0.602751	AT1G42440, AT1G06720
	GO:0000479	endonucleolytic cleavage of tricistronic rRNA transcript (SSU-rRNA, 5.8S rRNA, LSU-rRNA)	2	0.0411049	0.627134	AT2G29350, AT3G44260, AT1G65390
	GO:0002213	defense response to insect	3	0.0434378	0.627134	AT3G49670, AT5G65700, AT1G13710
	GO:0010075	regulation of meristem growth	3	0.0434378	0.627134	AT3G49670, AT5G65700, AT1G13710
	GO:0048437	floral organ development	3	0.0467915	0.655081	AT1G71890, AT1G71880, AT5G23660, AT3G48740, AT5G50790, AT1G22710, AT2G14670, AT5G43610, AT1G66570, AT5G06170, AT4G25010, AT5G50800
blue	GO:0015770	sucrose transport	12	7.46426e-16	4.47856e-13	AT5G67030, AT4G27520, AT5G40390, AT1G80160, AT4G02380, AT4G23400, AT1G13520, AT2G45960, AT5G59320, AT1G02820, AT5G05220, AT3G46620, AT5G02230, AT3G49190, AT1G06620, AT2G38800, AT4G00430, AT1G62660, AT2G16990, AT2G36780, AT1G27730, AT2G25625, AT2G46940, AT3G18560, AT1G76980, AT3G14440, AT4G36040, AT1G22480, AT3G61430, AT1G07660, AT3G11410, AT5G49700, AT1G63720, AT5G26340, AT1G30320, AT2G38530, AT2…
	GO:0009414	response to water deprivation	60	5.80315e-14	1.74095e-11	AT4G27520, AT5G40390, AT3G05880, AT4G02380, AT1G17840, AT1G13520, AT3G02850, AT2G36770, AT5G59320, AT3G46620, AT1G70670, AT3G11880, AT3G49190, AT3G55830, AT1G56580, AT1G56140, AT5G17760, AT1G62660, AT2G38400, AT2G16990, AT2G36780, AT1G27730, AT2G46940, AT5G59530, AT4G36040, AT3G11410, AT4G01870, AT5G49700, AT1G63720, AT5G25610, AT1G33110, AT5G26340, AT5G24240, AT1G30320, AT5G64260, AT4G04020, AT4…
	GO:0009737	response to abscisic acid	58	5.07666e-13	1.01533e-10	AT1G12240, AT1G71890, AT1G71880, AT1G62660, AT1G22710, AT2G14670, AT5G43610, AT1G66570, AT5G06170, AT5G20830, AT3G43190
	GO:0005985	sucrose metabolic process	11	8.69887e-12	1.30483e-09	AT4G01870, AT5G67030, AT2G30250, AT4G36010, AT2G22660, AT5G59540, AT1G06645, AT1G72370, AT5G05220, AT4G34710, AT1G04220, AT1G77120, AT2G40750, AT1G25400, AT2G17705, AT3G56400, AT4G25650, AT5G17380, AT1G78070, AT5G43450, AT3G02800, AT2G16990, AT2G20630, AT5G53450, AT3G61890, AT3G14440, AT1G15380, AT5G20830
	GO:0006970	response to osmotic stress	28	5.17968e-09	6.21561e-07	AT3G56400, AT5G42050, AT3G08720, AT1G78070, AT2G36800, AT5G63790, AT2G15890, AT5G64260, AT1G27730, AT1G73010, AT1G53840, AT1G17290, AT5G04340, AT5G06320, AT3G47720, AT5G62520, AT4G30440, AT2G40000, AT1G77120, AT5G20830, AT4G34131, AT3G43190
	GO:0071456	cellular response to hypoxia	22	2.38051e-08	2.38051e-06	AT3G55840, AT4G27520, AT1G63720, AT5G25610, AT2G16500, AT5G26340, AT1G17840, AT2G37760, AT2G36770, AT5G64260, AT2G30250, AT2G45960, AT1G72370, AT1G02820, AT5G62520, AT4G34710, AT1G77120, AT3G49190, AT2G38800, AT3G08720, AT3G49210, AT3G08760, AT1G62660, AT1G06040, AT1G56600, AT4G23650, AT1G27730, AT5G59310, AT1G19380, AT3G18560, AT3G61890, AT5G02020, AT3G16940
	GO:0009651	response to salt stress	33	1.02392e-07	8.77642e-06	AT5G40390, AT1G63720, AT1G13440, AT2G16500, AT2G19810, AT4G02380, AT1G13520, AT5G64260, AT2G14170, AT5G05340, AT5G02230, AT4G34710, AT2G01140, AT1G25400, AT3G63380, AT1G06620, AT3G53990, AT3G04120, AT3G08760, AT1G09350, AT4G11600, AT1G68440, AT5G26030, AT1G56600, AT1G27730, AT2G25625, AT5G59530, AT1G19380, AT2G40000, AT1G15380
	GO:0006979	response to oxidative stress	30	1.5051e-07	1.12882e-05	AT2G13820, AT3G51590, AT5G64080, AT5G09370, AT2G38530, AT4G25010, AT5G50800, AT2G38540, AT1G27950, AT2G15050, AT5G59320, AT5G59310, AT3G51600
	GO:0006869	lipid transport	13	9.75217e-07	6.50145e-05	AT5G67450, AT3G05880, AT2G16500, AT5G43760, AT4G02380, AT3G22840, AT2G37760, AT2G30250, AT4G04020, AT2G22300, AT4G34710, AT1G77120, AT3G53990, AT3G08720, AT1G78070, AT3G05890, AT1G09350, AT1G56600, AT5G47230, AT2G39730, AT5G43170, AT1G27730, AT5G37500, AT1G15380, AT5G20830, AT3G11410
	GO:0009409	response to cold	26	1.59633e-06	9.57798e-05	AT5G49700, AT5G67450, AT3G55840, AT1G63720, AT5G64260, AT1G19050, AT3G46620, AT5G59780, AT1G25400, AT3G56400, AT4G28400, AT1G62300, AT3G08760, AT3G19680, AT1G64380, AT3G02800, AT5G47230, AT5G43170, AT1G30755, AT1G27730, AT2G23320, AT1G19380, AT4G31550, AT5G59550, AT3G16720, AT2G24570
	GO:0010200	response to chitin	26	3.10404e-06	0.000169311	AT2G15490, AT3G54950, AT4G34135, AT2G15480, AT2G35980, AT3G53160, AT4G34131
	GO:0051707	response to other organism	7	6.25846e-06	0.000312923	AT5G67030, AT2G27150, AT3G14440, AT1G04580, AT5G20960, AT3G43600
	GO:0009688	abscisic acid biosynthetic process	6	1.15851e-05	0.000534695	AT1G17290, AT2G17280, AT3G08760, AT1G72330, AT5G25110, AT1G20970, AT3G19680, AT5G63790, AT1G77120, AT5G20830, AT3G43190, AT5G64260
	GO:0001666	response to hypoxia	12	1.89523e-05	0.000812241	AT3G27890, AT4G01870, AT3G51360, AT3G55840, AT1G63720, AT1G13440, AT4G22070, AT1G33110, AT1G62790, AT1G13520, AT5G64260, AT2G22300, AT5G59540, AT5G02230, AT2G40750, AT2G29990, AT1G25400, AT2G25110, AT3G63380, AT1G06620, AT3G57930, AT2G17705, AT3G56400, AT4G28400, AT5G43450, AT1G13550, AT3G08760, AT5G52640, AT5G17760, AT1G56145, AT3G02800, AT2G17760, AT2G39730, AT5G48380, AT2G17120, AT1G30755, AT1…
	GO:0042742	defense response to bacterium	43	4.49693e-05	0.00179877	AT3G04120, AT1G13440, AT1G60420, AT5G14780, AT4G11600, AT5G64250, AT2G37760, AT2G41380, AT1G17290, AT5G53460, AT5G13420, AT5G11670, AT1G77510, AT1G53680, AT2G01140, AT3G48990, AT1G77120, AT2G47470, AT5G20830
	GO:0046686	response to cadmium ion	19	0.000146063	0.00547736	AT5G42050, AT2G25625, AT1G15380, AT5G24240, AT4G02380, AT5G04760
	GO:1902074	response to salt	6	0.00047523	0.0166811	AT3G56400, AT3G55840, AT1G63720, AT3G08760, AT3G51340, AT3G51330, AT5G17760, AT1G28480, AT3G02800, AT1G13520, AT5G64260, AT2G17120, AT1G30755, AT5G08790, AT5G06320, AT2G40000, AT5G04760, AT2G40750
	GO:0009751	response to salicylic acid	18	0.000525826	0.0166811	AT3G51490, AT5G23660, AT3G47420, AT3G48740, AT5G50790, AT1G12600, AT4G25010, AT5G50800, AT4G23010
	GO:0008643	carbohydrate transport	9	0.000528235	0.0166811	AT4G01870, AT3G56400, AT4G02380, AT1G64140, AT2G17760, AT2G39730, AT2G35980, AT5G11520, AT2G22300, AT2G25625, AT5G08790, AT4G36040, AT1G76980
	GO:0010150	leaf senescence	13	0.000662368	0.019871	AT4G01870, AT3G56400, AT3G57930, AT2G17705, AT3G55840, AT4G28400, AT1G63720, AT1G33110, AT3G08760, AT3G51340, AT3G19680, AT1G68440, AT3G02800, AT1G13520, AT5G64260, AT2G17120, AT1G30755, AT5G59540, AT1G19380, AT3G18560, AT4G34138, AT2G40750, AT3G11880, AT1G25400
	GO:0031347	regulation of defense response	24	0.000927923	0.0265121	AT5G67450, AT3G55830, AT1G78070, AT1G12240, AT1G34120, AT1G62660, AT4G23650, AT2G22660, AT4G37790, AT5G05220, AT3G46620, AT1G24580, AT2G46680, AT5G59550, AT3G11410
	GO:0009738	abscisic acid-activated signaling pathway	15	0.00103396	0.028199	AT3G57930, AT2G38800, AT4G02860, AT5G17380, AT1G57680, AT1G56140, AT3G08760, AT3G19680, AT3G02800, AT5G64260, AT1G53730, AT1G19380, AT3G18560, AT1G50040, AT5G02230, AT3G13662, AT1G25400, AT3G63380
	GO:0009755	hormone-mediated signaling pathway	18	0.0017819	0.0464844	AT4G01870, AT3G56400, AT2G05260, AT1G78070, AT1G63720, AT5G17760, AT1G30320, AT1G64140, AT2G38400, AT2G39730, AT1G13520, AT5G64260, AT4G36010, AT5G37500, AT5G08790, AT2G46940, AT5G02230, AT1G06640, AT4G34710, AT1G25400, AT3G62070
	GO:0009753	response to jasmonic acid	21	0.00191145	0.0477864	AT3G56400, AT2G20570, AT5G44190, AT2G40750
	GO:1900056	negative regulation of leaf senescence	4	0.00305223	0.0732535	AT4G00430, AT2G45960, AT3G61430, AT4G23400, AT1G01620
	GO:0006833	water transport	5	0.0032787	0.0756622	AT5G06320, AT5G23570, AT2G19810, AT3G11650, AT2G35980, AT3G11410
	GO:0051607	defense response to virus	6	0.00381182	0.084707	AT5G11520, AT4G02850, AT4G02860, AT1G17290, AT1G72330, AT1G08470, AT1G03210
	GO:0009058	biosynthetic process	7	0.00423025	0.0906482	AT2G20570, AT5G44190, AT3G22840, AT4G14690
	GO:0010380	regulation of chlorophyll biosynthetic process	4	0.00442785	0.0916106	AT5G67450, AT3G05880, AT3G14440, AT1G18260, AT2G25090, AT5G43170
	GO:0042538	hyperosmotic salinity response	6	0.00566099	0.110589	AT3G01120, AT1G64660, AT1G33320
	GO:0019346	transsulfuration	3	0.00571375	0.110589	AT4G00430, AT3G51490, AT3G60970, AT2G16980, AT1G12600, AT4G23400, AT2G16970, AT4G08895, AT1G30220, AT2G16990, AT1G17840, AT2G45960, AT3G60160, AT3G61430, AT3G47420, AT1G01620
	GO:0055085	transmembrane transport	16	0.0061445	0.115209	AT5G53680, AT5G15450, AT5G52640, AT3G22840, AT4G14690, AT2G30250
	GO:0034605	cellular response to heat	6	0.00655221	0.119131	AT2G27150, AT5G17300, AT1G04580, AT5G20960, AT3G43600
	GO:0009851	auxin biosynthetic process	5	0.00755836	0.133383	AT4G36990, AT5G67030, AT3G53990, AT3G04120, AT3G08720, AT1G53730, AT5G15450, AT5G17760, AT5G52640, AT1G15380, AT1G09090
	GO:0009408	response to heat	11	0.00787548	0.135008	AT3G55840, AT1G80160, AT4G22070, AT1G33110, AT3G08760, AT1G62790, AT1G64140, AT2G36770, AT4G22240, AT4G36010, AT5G59530, AT3G18560, AT1G76980, AT3G14350, AT5G20400, AT3G63380
	GO:0019748	secondary metabolic process	16	0.00857434	0.142906	AT1G13540, AT1G57680, AT4G22070, AT3G51340, AT2G22800, AT3G61400, AT2G35980, AT2G35460, AT4G36010, AT5G05220, AT3G11880, AT3G62070, AT1G78070, AT1G56145, AT2G30840, AT3G19680, AT1G68440, AT1G64140, AT5G10520, AT5G59530, AT1G19380, AT3G18560, AT5G06320, AT1G76980, AT5G09330
	GO:0098542	defense response to other organism	25	0.0106563	0.172804	AT4G01870, AT2G17705, AT5G49700, AT4G36040, AT2G30840, AT1G30320, AT5G20400, AT2G17120, AT4G18430
	GO:0032870	cellular response to hormone stimulus	9	0.0114009	0.180014	AT5G14780, AT4G02380, AT1G17840, AT1G13520, AT5G64260, AT4G36010, AT5G08790, AT5G02230, AT4G34138, AT1G06640, AT4G34710, AT1G04220, AT1G25400, AT3G63380, AT1G06620, AT3G54420, AT2G05260, AT1G68440, AT2G38400, AT2G36780, AT1G27730, AT1G53840, AT2G46940, AT1G19380, AT3G18560, AT5G06320, AT1G15380
	GO:0009611	response to wounding	27	0.0133085	0.204746	AT4G01870, AT5G49700, AT3G55840, AT1G63720, AT4G22070, AT5G25110, AT5G65530, AT1G13520, AT2G15890, AT5G64260, AT2G22300, AT5G59540, AT2G40750, AT2G29990, AT1G25400, AT2G25110, AT3G63380, AT2G17705, AT3G56400, AT4G28400, AT1G13550, AT3G08760, AT5G17760, AT3G51330, AT3G19680, AT2G17120, AT1G27950, AT1G30755, AT5G10520, AT5G64810, AT4G30440, AT3G48990
	GO:0050832	defense response to fungus	32	0.0150188	0.225281	AT1G27730, AT3G22840, AT4G14690
	GO:0010117	photoprotection	3	0.016254	0.232201	AT1G75100, AT3G22840, AT4G14690
	GO:0071483	cellular response to blue light	3	0.016254	0.232201	AT3G55840, AT3G04530, AT1G56140, AT1G56130, AT1G56120, AT1G56145, AT5G65530, AT1G08650, AT4G32300, AT4G23650
	GO:0046777	protein autophosphorylation	10	0.0183624	0.256219	AT1G77510, AT2G30950, AT4G04020
	GO:0010205	photoinhibition	3	0.0196049	0.26734	AT2G37620, AT3G46520, AT3G53750, AT5G59370
	GO:0007010	cytoskeleton organization	4	0.0218213	0.290951	AT1G23170, AT4G22070, AT1G70770, AT1G62790, AT1G22480, AT3G45230, AT1G06640, AT1G33100, AT1G75460, AT2G17760, AT2G17120
	GO:0044281	small molecule metabolic process	11	0.0224876	0.293316	AT5G40930, AT3G27070, AT3G27080
	GO:0045040	protein import into mitochondrial outer membrane	3	0.0270792	0.345692	AT4G36990, AT3G56400, AT1G27730, AT5G67450, AT1G62300, AT5G08790, AT3G48710, AT5G63550, AT4G04450, AT5G43170
	GO:0045892	negative regulation of transcription, DNA-templated	10	0.0278361	0.347952	AT5G18480, AT2G37940, AT3G54020
	GO:0046513	ceramide biosynthetic process	3	0.0311793	0.374152	AT5G40930, AT3G27070, AT3G27080
	GO:0006626	protein targeting to mitochondrion	3	0.0311793	0.374152	AT2G15490, AT2G36750, AT3G63380, AT2G37760
	GO:0009636	response to toxic substance	4	0.0326986	0.384689	AT4G25010, AT5G50800
	GO:1905039	carboxylic acid transmembrane transport	2	0.039734	0.433462	AT4G25010, AT5G50800
	GO:1905200	gibberellic acid transmembrane transport	2	0.039734	0.433462	AT2G16980, AT2G16990
	GO:0015904	tetracycline transport	2	0.039734	0.433462	AT3G22840, AT4G14690
	GO:0071490	cellular response to far red light	2	0.039734	0.433462	AT3G56400, AT4G02380, AT2G40750, AT1G13520
	GO:0000302	response to reactive oxygen species	4	0.0430783	0.461554	AT4G01870, AT5G43450, AT2G36620, AT5G17760, AT1G33100, AT1G68440, AT3G02800, AT1G50940, AT1G49470, AT1G13520, AT1G69250, AT2G36770, AT5G64260, AT2G17120, AT1G49000, AT5G59540, AT5G59530, AT2G24270, AT2G29990, AT3G19900, AT1G25400, AT3G63380, AT4G34670
	GO:0010035	response to inorganic substance	23	0.0456708	0.480745	AT1G14100, AT2G15390, AT1G14110, AT2G03210, AT1G14080, AT2G03220, AT2G15370, AT2G15350
black	GO:0009969	xyloglucan biosynthetic process	8	8.39546e-13	1.58674e-10	AT1G14100, AT4G02100, AT2G15390, AT2G03210, AT1G14080, AT2G03220, AT2G15370, AT4G19120
	GO:0042546	cell wall biogenesis	8	2.7396e-06	0.00020336	AT1G14110, AT2G03210, AT2G15370, AT2G15350
	GO:0036065	fucosylation	4	3.22794e-06	0.00020336	AT1G14100, AT2G15390, AT1G14110, AT2G03210, AT1G14080, AT2G15370, AT2G15350
	GO:0006486	protein glycosylation	7	1.04159e-05	0.000492153	AT1G14100, AT2G15390, AT1G14110, AT2G03210, AT1G14080, AT2G03220, AT2G15370, AT1G19940, AT2G15350
	GO:0071555	cell wall organization	9	2.56465e-05	0.000969438	AT4G25630, AT5G52470, AT5G52490
	GO:0000494	box C/D snoRNA 3'-end processing	3	4.55914e-05	0.00123097	AT4G25630, AT5G52470, AT5G52490
	GO:1990258	histone glutamine methylation	3	4.55914e-05	0.00123097	AT3G52580, AT2G36160, AT2G43650, AT3G11510
	GO:0000462	maturation of SSU-rRNA from tricistronic rRNA transcript (SSU-rRNA, 5.8S rRNA, LSU-rRNA)	4	0.000242705	0.0057339	AT2G03090, AT1G26770, AT1G69530
	GO:0006949	syncytium formation	3	0.00154748	0.0292474	AT4G25630, AT5G52470, AT5G52490
	GO:0031167	rRNA methylation	3	0.00154748	0.0292474	AT4G25630, AT3G18610, AT1G48920, AT5G52470, AT2G43650
	GO:0006364	rRNA processing	5	0.00270288	0.0464403	AT3G52580, AT2G36160, AT3G11510
	GO:0000028	ribosomal small subunit assembly	3	0.00880178	0.129481	AT2G03090, AT1G26770, AT1G69530
	GO:0009828	plant-type cell wall loosening	3	0.00928117	0.129481	AT2G21320, AT4G38960, AT1G01060
	GO:0042752	regulation of circadian rhythm	3	0.0102741	0.129481	AT2G21320, AT4G38960, AT2G46830, AT1G01060
	GO:0007623	circadian rhythm	4	0.0102763	0.129481	AT2G46830, AT1G01060
	GO:0042754	negative regulation of circadian rhythm	2	0.0117305	0.138566	AT1G19180, AT1G74950, AT2G38240
	GO:2000022	regulation of jasmonic acid mediated signaling pathway	3	0.0129515	0.14399	AT4G02100, AT1G04680, AT4G19120, AT1G02650
	GO:0071669	plant-type cell wall organization or biogenesis	4	0.0171267	0.17983	AT3G19480, AT4G34200
	GO:0006564	L-serine biosynthetic process	2	0.0271597	0.270168	AT2G21320, AT4G38960, AT2G36910
	GO:0009640	photomorphogenesis	3	0.0317835	0.300354	AT1G18800, AT1G74560
	GO:0016444	somatic cell DNA recombination	2	0.0347847	0.313063	AT3G19480, AT1G60950
	GO:0009643	photosynthetic acclimation	2	0.0385751	0.324713	AT2G03090, AT1G26770, AT1G69530
	GO:0009664	plant-type cell wall organization	3	0.0395154	0.324713

## Sheet: Sheet3
Table S3. List of top 30 hub genes in each module for drought stress.
Module	Hub genes
Turquoise	GLYMA_01G078800
	GLYMA_04G209700
	GLYMA_06G105800
	GLYMA_10G079900
	GLYMA_01G115900
	GLYMA_04G167900
	GLYMA_12G092000
	GLYMA_03G262300
	GLYMA_01G198500
	GLYMA_01G018000
	GLYMA_03G224700
	GLYMA_05G192700
	GLYMA_06G132600
	GLYMA_02G215700
	GLYMA_10G231700
	GLYMA_01G076900
	GLYMA_06G263300
	GLYMA_08G232400
	GLYMA_01G006700
	GLYMA_02G141700
Yellow	GLYMA_01G214600
	GLYMA_03G201100
	GLYMA_06G106700
	GLYMA_06G317800
	GLYMA_01G108700
	GLYMA_07G152900
	GLYMA_08G034400
	GLYMA_01G124500
	GLYMA_01G053800
	GLYMA_03G201000
	GLYMA_02G250200
	GLYMA_03G181700
	GLYMA_02G093500
	GLYMA_03G202000
	GLYMA_08G158500
	GLYMA_02G125900
	GLYMA_03G001500
	GLYMA_02G014000
	GLYMA_01G133400
	GLYMA_03G090200
Red	GLYMA_09G093400
	GLYMA_04G082700
	GLYMA_09G225400
	GLYMA_01G023300
	GLYMA_08G303800
	GLYMA_02G015300
	GLYMA_03G027500
	GLYMA_03G246700
	GLYMA_05G085400
	GLYMA_02G015200
	GLYMA_08G341600
	GLYMA_01G232400
	GLYMA_08G264900
	GLYMA_02G208400
	GLYMA_10G274400
	GLYMA_03G027400
	GLYMA_02G090200
	GLYMA_01G215400
	GLYMA_08G042300
	GLYMA_02G023900
Pink	GLYMA_08G049200
	GLYMA_06G030500
	GLYMA_08G017300
	GLYMA_07G215900
	GLYMA_06G119500
	GLYMA_06G058500
	GLYMA_08G341700
	GLYMA_08G161600
	GLYMA_12G177900
	GLYMA_06G307100
	GLYMA_12G048900
	GLYMA_08G015600
	GLYMA_09G034500
	GLYMA_08G007900
	GLYMA_11G079500
	GLYMA_11G100800
	GLYMA_08G269600
	GLYMA_11G110900
	GLYMA_11G215200
	GLYMA_05G151400
Green	GLYMA_01G010200
	GLYMA_01G179900
	GLYMA_01G187300
	GLYMA_01G009200
	GLYMA_01G124700
	GLYMA_02G218300
	GLYMA_01G236800
	GLYMA_02G204700
	GLYMA_02G197600
	GLYMA_02G002000
	GLYMA_03G104700
	GLYMA_02G256800
	GLYMA_03G119500
	GLYMA_03G164300
	GLYMA_03G056700
	GLYMA_01G151700
	GLYMA_03G170300
	GLYMA_02G031700
	GLYMA_03G259400
	GLYMA_04G001500
Brown	GLYMA_10G048600
	GLYMA_01G004300
	GLYMA_01G188100
	GLYMA_02G047800
	GLYMA_09G185100
	GLYMA_06G010200
	GLYMA_03G130000
	GLYMA_11G112900
	GLYMA_11G101400
	GLYMA_07G095900
	GLYMA_03G234900
	GLYMA_02G108600
	GLYMA_06G193200
	GLYMA_08G177400
	GLYMA_09G167900
	GLYMA_12G148200
	GLYMA_05G081300
	GLYMA_08G006500
	GLYMA_10G156900
	GLYMA_11G071400
Blue	GLYMA_01G238800
	GLYMA_05G217000
	GLYMA_01G157300
	GLYMA_06G021200
	GLYMA_02G217600
	GLYMA_02G001500
	GLYMA_03G040600
	GLYMA_12G046800
	GLYMA_06G135100
	GLYMA_07G215400
	GLYMA_03G157700
	GLYMA_08G178100
	GLYMA_11G147100
	GLYMA_05G003900
	GLYMA_03G220800
	GLYMA_08G153700
	GLYMA_04G061500
	GLYMA_03G227400
	GLYMA_02G104200
	GLYMA_03G101000
Black	GLYMA_02G270200
	GLYMA_03G198500
	GLYMA_02G249600
	GLYMA_03G245100
	GLYMA_01G142400
	GLYMA_12G169400
	GLYMA_01G145400
	GLYMA_04G170400
	GLYMA_01G213300
	GLYMA_01G190500
	GLYMA_04G025000
	GLYMA_07G260300
	GLYMA_02G269000
	GLYMA_03G183600
	GLYMA_02G296600
	GLYMA_03G128900
	GLYMA_03G241100
	GLYMA_05G031500
	GLYMA_06G102000
	GLYMA_02G203300

## Sheet: Sheet4
Table S4. List of transcription factors enriched for drought stress DEGs.
ID	family	p-value	up/down regulate	Transcript.stable.ID	UniGene.ID	modules
GLYMA_01G003000	MYB-related	1.16e-19	down	KRH74155	Gma.15643	turquoise
GLYMA_01G005000	C3H	0.0071107	down	KRH74187	Gma.9001	yellow
GLYMA_01G053800	WRKY	7.78e-05	down	KRH74903	Gma.2737	yellow
GLYMA_01G076900	bHLH	1.16e-19	down	KRH75291		turquoise
GLYMA_01G087500	AP2/ERF-RAV	0.00883851	down	KRH75430	Gma.8014	turquoise
GLYMA_01G103500	B3-ARF	0.00762966	up	KRH75683	Gma.25161	turquoise
GLYMA_01G177400	bZIP	1.45e-19	up	KRH76760	Gma.57477	turquoise
GLYMA_01G179900	HB-BELL	1.45e-19	up	KRH76886	Gma.23207	green
GLYMA_01G185800	HSF	0.00329852	down	KRH76994	Gma.22694	blue
GLYMA_01G204400	Tify	0.00409541	up	KRH77253	Gma.56119	black
GLYMA_01G217400	HSF	1.16e-19	down	KRH77473	Gma.10695	yellow
GLYMA_01G224800	WRKY	1.16e-19	down	KRH77570		blue
GLYMA_01G234000	PLATZ	1.45e-19	up	KRH77759	Gma.8449	blue
GLYMA_02G016100	AP2/ERF-ERF	8.6e-06	down	KRH69265	Gma.27278	brown
GLYMA_02G055900	MYB-related	1.16e-19	down	KRH69875	Gma.12911	turquoise
GLYMA_02G082000	Trihelix	1.16e-19	down	KRH70281	Gma.5418	turquoise
GLYMA_02G087400	AP2/ERF-ERF	1.45e-19	up	KRH70363		black
GLYMA_02G099500	AP2/ERF-RAV	3.06e-06	down	KRH70594		turquoise
GLYMA_02G108600	C2C2-Dof	1.22e-06	up	KRH70740		brown
GLYMA_02G139700	bHLH	1.45e-19	up	KRH71205	Gma.4105	yellow
GLYMA_02G195000	NF-YA	0.00389274	down	KRH72098	Gma.53962	turquoise
GLYMA_02G227000	C3H	0.000109231	down	KRH72677		yellow
GLYMA_02G232600	WRKY	6.83e-06	down	KRH72748	Gma.13703	blue
GLYMA_02G241000	MYB-related	0.00932509	down	KRH72912	Gma.12080	blue
GLYMA_02G244600	MYB	3.95e-05	down	KRH72965		turquoise
GLYMA_02G296600	C3H	1.22e-06	up	KRH73729	Gma.26513	black
GLYMA_03G070500	B3-ARF	1.16e-19	down	KRH65878	Gma.1727	green
GLYMA_03G078000	MYB	0.00046567	down	KRH65921	Gma.26034	turquoise
GLYMA_03G081900	MYB	0.00306254	down	KRH66029	Gma.18853	turquoise
GLYMA_03G086800	bHLH	0.00328184	up	KRH66151	Gma.6719	black
GLYMA_03G105700	bHLH	1.45e-19	up	KRH66404	Gma.53594	green
GLYMA_03G170300	bHLH	1.22e-06	up	KRH67415	Gma.15915	green
GLYMA_03G203000	NF-YA	0.000198092	down	KRH68010	Gma.20979	blue
GLYMA_03G220800	WRKY	1.16e-19	down	KRH68246	Gma.5000	blue
GLYMA_03G224700	WRKY	1.16e-19	down	KRH68330		turquoise
GLYMA_03G247100	bZIP	1.45e-19	up	KRH68730	Gma.52399	turquoise
GLYMA_03G256700	WRKY	1.54e-05	down	KRH68810		turquoise
GLYMA_03G261800	MYB-related	1.16e-19	down	KRH68970	Gma.11189	black
GLYMA_04G008900	C2C2-GATA	0.000636752	up	KRH60775	Gma.26952	yellow
GLYMA_04G010300	bZIP	0.000121813	up	KRH60782		turquoise
GLYMA_04G012500	bHLH	1.16e-19	down	KRH60802	Gma.33842	turquoise
GLYMA_04G017400	RWP-RK	1.16e-19	down	KRH60879	Gma.4265	turquoise
GLYMA_04G044900	C2H2	0.000478714	up	KRH61385		turquoise
GLYMA_04G050300	C3H	0.005461	down	KRH61486		turquoise
GLYMA_04G058900	C2C2-CO-like	1.16e-19	down	KRH61616	Gma.22745	turquoise
GLYMA_04G064100	HB-KNOX	1.16e-19	down	KRH61709		blue
GLYMA_04G158800	C2C2-Dof	0.00424489	down	KRH63155	Gma.61854	turquoise
GLYMA_04G168300	C2C2-Dof	7.54e-05	down	KRH63318	Gma.18151	turquoise
GLYMA_04G208300	NAC	1.16e-19	down	KRH63959		blue
GLYMA_04G223300	WRKY	1.16e-19	down	KRH64197	Gma.23162	turquoise
GLYMA_05G018100	C2C2-Dof	1.16e-19	down	KRH56727	Gma.2329	turquoise
GLYMA_05G018800	MADS-MIKC	2.03e-05	down	KRH56758		yellow
GLYMA_05G032200	MYB-related	1.22e-06	up	KRH56984	Gma.25239	turquoise
GLYMA_05G056000	C2C2-YABBY	0.00157518	down	KRH57341	Gma.2883	black
GLYMA_05G098200	MYB	0.00441912	up	KRH57971		turquoise
GLYMA_05G109500	HB-HD-ZIP	0.00106776	down	KRH58085		blue
GLYMA_05G112200	C2C2-LSD	1.07e-06	down	KRH58184	Gma.34276	turquoise
GLYMA_05G139000	C2H2	8.82e-06	up	KRH58608	Gma.55165	turquoise
GLYMA_05G160800	WRKY	0.00714543	down	KRH58970		turquoise
GLYMA_05G178200	CAMTA	0.00372097	down	KRH59310		blue
GLYMA_05G195000	NAC	0.00668068	up	KRH59602		yellow
GLYMA_05G215900	WRKY	0.00892587	up	KRH59993		turquoise
GLYMA_05G224400	C3H	0.0013932	up	KRH51363	Gma.28802	turquoise
GLYMA_06G010200	bZIP	0.0013932	up	KRH51363	Gma.28802	brown
GLYMA_06G012200	bHLH	1.16e-19	down	KRH51517		turquoise
GLYMA_06G017800	RWP-RK	3.95e-05	down	KRH51556	Gma.57987	brown
GLYMA_06G045400	C2H2	1.16e-19	down	KRH52061	Gma.3433	blue
GLYMA_06G050300	C3H	1.45e-19	up	KRH52162	Gma.3405	turquoise
GLYMA_06G059600	C2C2-CO-like	1.16e-19	down	KRH52284		turquoise
GLYMA_06G065200	HB-KNOX	1.45e-19	up	KRH52351	Gma.4549	blue
GLYMA_06G086600	HB-HD-ZIP	1.16e-19	down	KRH52719	Gma.4462	blue
GLYMA_06G095200	zf-HD	9.72e-05	down	KRH52853		turquoise
GLYMA_06G121300	GRAS	1.16e-19	down	KRH53361	Gma.31000	turquoise
GLYMA_06G142000	WRKY	1.45e-19	up	KRH53712		turquoise
GLYMA_06G147100	WRKY	2.03e-05	down	KRH53802	Gma.62060	red
GLYMA_06G157400	NAC	1.07e-06	down	KRH53898	Gma.30423	blue
GLYMA_06G165700	bHLH	1.45e-19	up	KRH54109		brown
GLYMA_06G171400	Trihelix	1.16e-19	down	KRH54186	Gma.19354	turquoise
GLYMA_06G187600	MYB-related	1.45e-19	up	KRH54468	Gma.5600	brown
GLYMA_06G190200	HB-HD-ZIP	1.16e-19	down	KRH54497		turquoise
GLYMA_06G194800	C2C2-Dof	0.000328265	up	KRH54559		turquoise
GLYMA_06G206400	C2C2-Dof	0.00172932	down	KRH54624		turquoise
GLYMA_06G248900	NAC	1.16e-19	down	KRH55334	Gma.2542	blue
GLYMA_06G265800	C2H2	0.000249642	down	KRH55575		yellow
GLYMA_06G290000	AP2/ERF-ERF	0.00691915	up	KRH55854		blue
GLYMA_06G303100	MYB-related	1.16e-19	down	KRH56043	Gma.2290	blue
GLYMA_07G009100	C2H2	1.16e-19	down	KRH47068	Gma.2019	turquoise
GLYMA_07G023300	WRKY	1.16e-19	down	KRH47328		turquoise
GLYMA_07G036200	NF-YA	4.66e-06	up	KRH47527	Gma.59864	green
GLYMA_07G041400	Tify	1.09e-05	up	KRH47614	Gma.4374	brown
GLYMA_07G048500	MYB-related	0.00183083	up	KRH47738		red
GLYMA_07G051500	bHLH	0.000631023	down	KRH47833	Gma.37898	turquoise
GLYMA_07G052100	HB-HD-ZIP	1.16e-19	down	KRH47834		blue
GLYMA_07G055000	AP2/ERF-ERF	0.00110206	up	KRH47846	Gma.55082	green
GLYMA_07G126800	C3H	0.000378761	up	KRH49009	Gma.7301	blue
GLYMA_07G158200	C2H2	0.000963394	up	KRH49417		turquoise
GLYMA_07G198900	C2C2-Dof	8.75e-05	down	KRH50060		turquoise
GLYMA_07G242000	CAMTA	1.07e-06	down	KRH50756		blue
GLYMA_08G041100	C2C2-CO-like	1.09e-05	up	KRH41595		turquoise
GLYMA_08G043000	Tify	0.00750845	up	KRH41654	Gma.6507	turquoise
GLYMA_08G094200	C2H2	0.00113722	up	KRH42512		turquoise
GLYMA_08G105400	MADS-MIKC	1.45e-19	up	KRH42675	Gma.6557	blue
GLYMA_08G132800	HB-HD-ZIP	0.00413811	up	KRH43111	Gma.5353	turquoise
GLYMA_08G135200	CAMTA	1.45e-19	up	KRH43156		blue
GLYMA_08G137600	AP2/ERF-ERF	1.16e-19	down	KRH43210		turquoise
GLYMA_08G142400	WRKY	1.16e-19	down	KRH43310	Gma.6884	blue
GLYMA_08G152500	bHLH	1.45e-19	up	KRH43458		turquoise
GLYMA_08G156500	NAC	0.00243529	up	KRH43521	Gma.30881	blue
GLYMA_08G169000	LBD	1.16e-19	down	KRH43735	Gma.21228	brown
GLYMA_08G202300	AP2/ERF-ERF	1.16e-19	down	RCW19276		yellow
GLYMA_08G218600	WRKY	0.000252717	up	KRH44530	Gma.38979	yellow
GLYMA_08G255200	C2C2-CO-like	0.000207339	up	KRH45167	Gma.24663	turquoise
GLYMA_08G303900	bHLH	0.00201435	down	KRH45974	Gma.1578	turquoise
GLYMA_08G329300	bHLH	0.00255402	up	KRH46266		turquoise
GLYMA_08G365100	LBD	0.00133901	up	KRH46911		turquoise
GLYMA_09G005700	WRKY	1.16e-19	down	KRH36484	Gma.866	blue
GLYMA_09G041500	AP2/ERF-ERF	1.45e-19	up	KRH37041	Gma.5947	turquoise
GLYMA_09G060200	bHLH	1.45e-19	up	KRH37211		turquoise
GLYMA_09G061900	WRKY	1.16e-19	down	KRH37338	Gma.12279	blue
GLYMA_09G068400	NF-YA	0.000203933	down	KRH37446	Gma.23820	turquoise
GLYMA_09G099000	DBB	1.16e-19	down	KRH37909		brown
GLYMA_09G167900	MYB-related	1.45e-19	up	KRH38854	Gma.19960	brown
GLYMA_09G204500	bHLH	1.22e-06	up	KRH39516		turquoise
GLYMA_09G251200	C3H	1.45e-19	up	KRH40307	Gma.56104	turquoise
GLYMA_09G274000	WRKY	0.00241799	down	KRH40715		blue
GLYMA_09G284300	TCP	3.95e-05	down	KRH40890	Gma.59565	green
GLYMA_09G284500	TCP	0.00150246	down	KRH40902		turquoise
GLYMA_10G011300	WRKY	1.16e-19	down	KRH31765		yellow
GLYMA_10G036700	AP2/ERF-ERF	0.00101275	down	KRH32099	Gma.5105	turquoise
GLYMA_10G170800	C3H	0.00182358	up	KRH34201	Gma.2885	turquoise
GLYMA_10G194200	AP2/ERF-ERF	1.16e-19	down	KRH34597	Gma.16827	brown
GLYMA_10G206600	C2H2	8.6e-06	down	KRH34779	Gma.12444	turquoise
GLYMA_10G210500	C2C2-GATA	1.22e-06	up	KRH34861		turquoise
GLYMA_10G225100	Trihelix	1.45e-19	up	KRH35106		turquoise
GLYMA_10G237800	HSF	1.16e-19	down	KRH35349		yellow
GLYMA_10G257900	MYB-related	1.45e-19	up	KRH35665	Gma.61836	blue
GLYMA_10G277800	MYB-related	1.45e-19	up	KRH35989	Gma.21407	blue
GLYMA_10G285900	TCP	1.16e-19	down	KRH36118		green
GLYMA_10G295200	FAR1	0.00267172	down	KRH36260	Gma.60249	yellow
GLYMA_11G018100	AP2/ERF-ERF	1.16e-19	down	KRH27846		blue
GLYMA_11G025700	HSF	1.45e-19	up	KRH27931	Gma.10886	yellow
GLYMA_11G036400	Tify	1.16e-19	down	KRH28069		blue
GLYMA_11G038600	Tify	1.16e-19	down	KRH28178		turquoise
GLYMA_11G045100	HB-HD-ZIP	0.00507299	down	KRH28292	Gma.52525	turquoise
GLYMA_11G053100	WRKY	1.97e-05	down	KRH28410	Gma.55067	blue
GLYMA_11G065000	bZIP	1.16e-19	down	KRH28553	Gma.55215	turquoise
GLYMA_11G074900	DBB	0.000236559	down	KRH28743		red
GLYMA_11G109100	PLATZ	1.16e-19	down	KRH29260	Gma.55984	yellow
GLYMA_11G110900	DBB	1.22e-06	up	KRH29329	Gma.3085	Pink
GLYMA_11G127100	DBB	1.45e-19	up	KRH29582		blue
GLYMA_11G142900	MYB-related	3.74e-05	down	KRH29812	Gma.32745	blue
GLYMA_11G145400	C2C2-GATA	1.16e-19	down	KRH29852		turquoise
GLYMA_11G163300	WRKY	1.16e-19	down	KRH30136		yellow
GLYMA_11G189500	C2H2	1.16e-19	down	KRH30509		green
GLYMA_11G192600	C2H2	0.00720602	down	KRH30554	Gma.32160	turquoise
GLYMA_11G204200	B3-ARF	1.45e-19	up	KRH30725		turquoise
GLYMA_11G215800	MYB	0.000813758	up	KRH30932	Gma.17450	turquoise
GLYMA_11G216500	GRAS	1.16e-19	down	KRH30941	Gma.34740	turquoise
GLYMA_11G231500	LBD	1.16e-19	down	KRH31154		turquoise
GLYMA_12G022700	NAC	1.16e-19	down	KRH24096	Gma.61666	turquoise
GLYMA_12G030800	CSD	0.0086054	down	KRH24211	Gma.59689	brown
GLYMA_12G037200	DBB	1.45e-19	up	KRH24367	Gma.32878	black
GLYMA_12G042800	bHLH	1.16e-19	down	KRH24456		turquoise
GLYMA_12G066000	MYB-related	5.31e-05	down	KRH24811		turquoise
GLYMA_12G073300	AP2/ERF-AP2	1.45e-19	up	KRH24954	Gma.7226	blue
GLYMA_12G076200	B3-ARF	1.16e-19	down	KRH25013		turquoise
GLYMA_12G081400	C2H2	1.16e-19	down	KRH25110	Gma.6384	turquoise
GLYMA_12G117700	GARP-G2-like	1.45e-19	up	KRH25639	Gma.4971	blue
GLYMA_12G178900	C2H2	1.07e-06	down	KRH26536	Gma.2513	turquoise
GLYMA_12G190500	C2C2-YABBY	6.23e-05	up	KRH26663		brown
GLYMA_12G206600	GARP-G2-like	6.59e-05	up	KRH26977		turquoise
GLYMA_12G226600	AP2/ERF-ERF	1.16e-19	down	RCW19148		brown
GLYMA_12G236800	NF-YA	0.000727273	down	KRH27468		turquoise
GLYMA_13G333200	MYB	1.45e-19	up	KRH21901	Gma.7110	turquoise

## Sheet: Sheet5
Table S5. List of known cis-acting elements drought stress DEGs by Tomtom search against the JASPAR database.
Motif ID	Consensus motif	JASPAR ID	Optimal_offset	p-value	E-value	q-value	Overlap	Query_consensus	Target_consensus	Orientation
motif 1	DKDRRRRDDRARGARDGDGDGARARRRDRRRRRRRARRGRR	MA1403.1	-11	1.25771e-13	2.46007e-10	4.88546e-10	30	GGGGGAAGGGAGGAGAGAGAGAAAGAGAGAGAGGAAGGGGG	AGAGAGAGAGAGAGAGAGAGAGAGAGAGAG	+
motif 1	DKDRRRRDDRARGARDGDGDGARARRRDRRRRRRRARRGRR	MA1404.1	-12	4.5859e-13	8.97003e-10	8.90679e-10	24	GGGGGAAGGGAGGAGAGAGAGAAAGAGAGAGAGGAAGGGGG	GAGAGAGAGAGAGAGAGAGAGAGA	+
motif 1	DKDRRRRDDRARGARDGDGDGARARRRDRRRRRRRARRGRR	MA1402.1	-12	3.23174e-12	6.32128e-09	4.18448e-09	21	GGGGGAAGGGAGGAGAGAGAGAAAGAGAGAGAGGAAGGGGG	GAGAGAGAGAGAGAGAGAGAG	-
motif 1	DKDRRRRDDRARGARDGDGDGARARRRDRRRRRRRARRGRR	MA1416.1	-12	3.74498e-09	7.32518e-06	3.63677e-06	14	GGGGGAAGGGAGGAGAGAGAGAAAGAGAGAGAGGAAGGGGG	GAGAGAGAGAGAGA	+
motif 1	DKDRRRRDDRARGARDGDGDGARARRRDRRRRRRRARRGRR	MA1381.1	-11	1.51606e-06	0.00296542	0.000995352	15	GGGGGAAGGGAGGAGAGAGAGAAAGAGAGAGAGGAAGGGGG	GGAGAGTGAAAATGA	-
motif 1	DKDRRRRDDRARGARDGDGDGARARRRDRRRRRRRARRGRR	MA0205.2	-12	1.53745e-06	0.00300725	0.000995352	12	GGGGGAAGGGAGGAGAGAGAGAAAGAGAGAGAGGAAGGGGG	GAAAGAGAGAGA	+
motif 1	DKDRRRRDDRARGARDGDGDGARARRRDRRRRRRRARRGRR	MA0080.6	-19	5.46375e-06	0.0106871	0.00303193	17	GGGGGAAGGGAGGAGAGAGAGAAAGAGAGAGAGGAAGGGGG	AAAAAGAGGAAGTGGAA	+
motif 1	DKDRRRRDDRARGARDGDGDGARARRRDRRRRRRRARRGRR	MA1267.1	-6	6.31356e-06	0.0123493	0.00306557	29	GGGGGAAGGGAGGAGAGAGAGAAAGAGAGAGAGGAAGGGGG	AAAAAAAAAAAAGTAAAAAAAAAAAAAAA	-
motif 1	DKDRRRRDDRARGARDGDGDGARARRRDRRRRRRRARRGRR	MA0543.1	-11	1.65438e-05	0.0323596	0.00669679	15	GGGGGAAGGGAGGAGAGAGAGAAAGAGAGAGAGGAAGGGGG	AGAGAGACGCAGAGA	+
motif 1	DKDRRRRDDRARGARDGDGDGARARRRDRRRRRRRARRGRR	MA0081.2	-8	1.72401e-05	0.0337217	0.00669679	16	GGGGGAAGGGAGGAGAGAGAGAAAGAGAGAGAGGAAGGGGG	AAAAGAGGAAGTGAAA	-
motif 1	DKDRRRRDDRARGARDGDGDGARARRRDRRRRRRRARRGRR	MA1268.1	-4	2.06105e-05	0.0403141	0.00727817	27	GGGGGAAGGGAGGAGAGAGAGAAAGAGAGAGAGGAAGGGGG	AAAAAAAAAAAAAAGAAAAAGTGAAAA	-
motif 1	DKDRRRRDDRARGARDGDGDGARARRRDRRRRRRRARRGRR	MA0537.1	-12	4.97062e-05	0.0972253	0.01609	11	GGGGGAAGGGAGGAGAGAGAGAAAGAGAGAGAGGAAGGGGG	AAAAGTGAAAA	+
motif 1	DKDRRRRDDRARGARDGDGDGARARRRDRRRRRRRARRGRR	MA0508.3	-16	5.57092e-05	0.108967	0.016646	11	GGGGGAAGGGAGGAGAGAGAGAAAGAGAGAGAGGAAGGGGG	AAGAGAAAGAA	-
motif 1	DKDRRRRDDRARGARDGDGDGARARRRDRRRRRRRARRGRR	MA0149.1	-20	6.35859e-05	0.124374	0.017043	18	GGGGGAAGGGAGGAGAGAGAGAAAGAGAGAGAGGAAGGGGG	GGAAGGAAGGAAGGAAGG	+
motif 1	DKDRRRRDDRARGARDGDGDGARARRRDRRRRRRRARRGRR	MA1279.1	-4	6.81679e-05	0.133336	0.017043	21	GGGGGAAGGGAGGAGAGAGAGAAAGAGAGAGAGGAAGGGGG	AAAAAAAAGAAAAAGTGAAAA	+
motif 1	DKDRRRRDDRARGARDGDGDGARARRRDRRRRRRRARRGRR	MA1277.1	-15	7.29756e-05	0.14274	0.017043	21	GGGGGAAGGGAGGAGAGAGAGAAAGAGAGAGAGGAAGGGGG	AAAAAGAAAAAGTAAAAAAAA	+
motif 1	DKDRRRRDDRARGARDGDGDGARARRRDRRRRRRRARRGRR	MA1723.1	-15	7.4588e-05	0.145894	0.017043	24	GGGGGAAGGGAGGAGAGAGAGAAAGAGAGAGAGGAAGGGGG	GGTGGGCAGGGAGGAAGCAGAAGG	+
motif 1	DKDRRRRDDRARGARDGDGDGARARRRDRRRRRRRARRGRR	MA1281.1	-12	0.000102199	0.199901	0.0220547	21	GGGGGAAGGGAGGAGAGAGAGAAAGAGAGAGAGGAAGGGGG	AAAAAAGTAAAAAAAAAAAAA	+
motif 1	DKDRRRRDDRARGARDGDGDGARARRRDRRRRRRRARRGRR	MA1274.1	-10	0.000133179	0.260499	0.0262709	21	GGGGGAAGGGAGGAGAGAGAGAAAGAGAGAGAGGAAGGGGG	AAAAAAAAAAAAAAAAGTAAA	-
motif 1	DKDRRRRDDRARGARDGDGDGARARRRDRRRRRRRARRGRR	MA1781.1	-6	0.000135263	0.264574	0.0262709	19	GGGGGAAGGGAGGAGAGAGAGAAAGAGAGAGAGGAAGGGGG	TAGAAGGTAGTTGGGAAAT	-
motif 1	DKDRRRRDDRARGARDGDGDGARARRRDRRRRRRRARRGRR	MA1278.1	-15	0.000253682	0.496203	0.0469243	21	GGGGGAAGGGAGGAGAGAGAGAAAGAGAGAGAGGAAGGGGG	AAAAAGTAAAAAAAAAAAAAA	-
motif 1	DKDRRRRDDRARGARDGDGDGARARRRDRRRRRRRARRGRR	MA1987.1	-18	0.000346945	0.678624	0.0587268	21	GGGGGAAGGGAGGAGAGAGAGAAAGAGAGAGAGGAAGGGGG	GAGCACCAAAGGGGGGAAGGG	+
motif 1	DKDRRRRDDRARGARDGDGDGARARRRDRRRRRRRARRGRR	MA1652.1	-9	0.000347727	0.680153	0.0587268	14	GGGGGAAGGGAGGAGAGAGAGAAAGAGAGAGAGGAAGGGGG	GGAGGAGGTGAGAA	+
motif 1	DKDRRRRDDRARGARDGDGDGARARRRDRRRRRRRARRGRR	MA1774.1	-6	0.000373941	0.731428	0.0605227	19	GGGGGAAGGGAGGAGAGAGAGAAAGAGAGAGAGGAAGGGGG	AAAAAGGTGGTTGGAAAAG	-
motif 1	DKDRRRRDDRARGARDGDGDGARARRRDRRRRRRRARRGRR	MA1700.1	-12	0.00040771	0.797481	0.0633487	14	GGGGGAAGGGAGGAGAGAGAGAAAGAGAGAGAGGAAGGGGG	GAGCGAGCGAGAGA	+
motif 1	DKDRRRRDDRARGARDGDGDGARARRRDRRRRRRRARRGRR	MA0598.3	-26	0.000768906	1.50398	0.114875	15	GGGGGAAGGGAGGAGAGAGAGAAAGAGAGAGAGGAAGGGGG	GAAACAGGAAGTGAG	-
motif 1	DKDRRRRDDRARGARDGDGDGARARRRDRRRRRRRARRGRR	MA1193.1	-3	0.000857161	1.67661	0.123318	21	GGGGGAAGGGAGGAGAGAGAGAAAGAGAGAGAGGAAGGGGG	AAAAAATTGGATAAGGATAAG	+
motif 1	DKDRRRRDDRARGARDGDGDGARARRRDRRRRRRRARRGRR	MA0062.3	-27	0.00102259	2.00019	0.141863	14	GGGGGAAGGGAGGAGAGAGAGAAAGAGAGAGAGGAAGGGGG	AAACAGGAAGTGGG	-
motif 1	DKDRRRRDDRARGARDGDGDGARARRRDRRRRRRRARRGRR	MA1823.1	-21	0.00118335	2.31464	0.155085	12	GGGGGAAGGGAGGAGAGAGAGAAAGAGAGAGAGGAAGGGGG	AAAAAGAAAAAA	+
motif 1	DKDRRRRDDRARGARDGDGDGARARRRDRRRRRRRARRGRR	MA1284.1	-16	0.00119775	2.34279	0.155085	25	GGGGGAAGGGAGGAGAGAGAGAAAGAGAGAGAGGAAGGGGG	ATAGGCCCAAGAGAGGAGGTGGGGCCCACA	-
motif 1	DKDRRRRDDRARGARDGDGDGARARRRDRRRRRRRARRGRR	MA1270.1	-18	0.00167719	3.28058	0.200452	19	GGGGGAAGGGAGGAGAGAGAGAAAGAGAGAGAGGAAGGGGG	AAAAAAAGCAAAAAGTAAA	-
motif 1	DKDRRRRDDRARGARDGDGDGARARRRDRRRRRRRARRGRR	MA0761.2	-27	0.00170293	3.33094	0.200452	14	GGGGGAAGGGAGGAGAGAGAGAAAGAGAGAGAGGAAGGGGG	AAACAGGAAGTGAA	+
motif 1	DKDRRRRDDRARGARDGDGDGARARRRDRRRRRRRARRGRR	MA0452.2	-18	0.00170293	3.33094	0.200452	14	GGGGGAAGGGAGGAGAGAGAGAAAGAGAGAGAGGAAGGGGG	GAAAAAGGGTTAAA	-
motif 1	DKDRRRRDDRARGARDGDGDGARARRRDRRRRRRRARRGRR	MA0474.3	-27	0.00226032	4.42119	0.258237	14	GGGGGAAGGGAGGAGAGAGAGAAAGAGAGAGAGGAAGGGGG	AAACAGGAAGTGGG	+
motif 1	DKDRRRRDDRARGARDGDGDGARARRRDRRRRRRRARRGRR	MA1776.1	-3	0.00237712	4.64964	0.259928	21	GGGGGAAGGGAGGAGAGAGAGAAAGAGAGAGAGGAAGGGGG	GTAGTGGTAATGTTAGGTGGA	-
motif 1	DKDRRRRDDRARGARDGDGDGARARRRDRRRRRRRARRGRR	MA1522.1	-31	0.00240896	4.71192	0.259928	10	GGGGGAAGGGAGGAGAGAGAGAAAGAGAGAGAGGAAGGGGG	GGGGAGGGGCG	-
motif 1	DKDRRRRDDRARGARDGDGDGARARRRDRRRRRRRARRGRR	MA1965.1	-30	0.00303847	5.94325	0.318992	10	GGGGGAAGGGAGGAGAGAGAGAAAGAGAGAGAGGAAGGGGG	GGGGGAGGGG	-
motif 1	DKDRRRRDDRARGARDGDGDGARARRRDRRRRRRRARRGRR	MA1653.1	-30	0.00328742	6.4302	0.328467	11	GGGGGAAGGGAGGAGAGAGAGAAAGAGAGAGAGGAAGGGGG	GGGGGAGGGGGG	-
motif 1	DKDRRRRDDRARGARDGDGDGARARRRDRRRRRRRARRGRR	MA2029.1	-7	0.00329784	6.45058	0.328467	13	GGGGGAAGGGAGGAGAGAGAGAAAGAGAGAGAGGAAGGGGG	TGGAGGAGCGTGT	-
motif 1	DKDRRRRDDRARGARDGDGDGARARRRDRRRRRRRARRGRR	MA1565.1	-12	0.00354429	6.93263	0.335793	12	GGGGGAAGGGAGGAGAGAGAGAAAGAGAGAGAGGAAGGGGG	GGAGGTGTGAAA	+
motif 1	DKDRRRRDDRARGARDGDGDGARARRRDRRRRRRRARRGRR	MA1630.2	-30	0.00354429	6.93263	0.335793	11	GGGGGAAGGGAGGAGAGAGAGAAAGAGAGAGAGGAAGGGGG	GGGGGAGGGGAG	+
motif 1	DKDRRRRDDRARGARDGDGDGARARRRDRRRRRRRARRGRR	MA1773.1	-10	0.00366006	7.15908	0.338506	21	GGGGGAAGGGAGGAGAGAGAGAAAGAGAGAGAGGAAGGGGG	AGGTAGGTGAAAATTTTGAAA	-
motif 1	DKDRRRRDDRARGARDGDGDGARARRRDRRRRRRRARRGRR	MA0136.3	-28	0.00381945	7.47085	0.345032	12	GGGGGAAGGGAGGAGAGAGAGAAAGAGAGAGAGGAAGGGGG	AGAAGGAAGTGA	+
motif 1	DKDRRRRDDRARGARDGDGDGARARRRDRRRRRRRARRGRR	MA1382.1	-8	0.00394433	7.71511	0.348215	15	GGGGGAAGGGAGGAGAGAGAGAAAGAGAGAGAGGAAGGGGG	GGAGGCGCGTGAGGT	-
motif 1	DKDRRRRDDRARGARDGDGDGARARRRDRRRRRRRARRGRR	MA1710.1	-7	0.00442939	8.66388	0.369673	12	GGGGGAAGGGAGGAGAGAGAGAAAGAGAGAGAGGAAGGGGG	GAGAGGCAAGGG	+
motif 1	DKDRRRRDDRARGARDGDGDGARARRRDRRRRRRRARRGRR	MA1273.1	-14	0.00445584	8.71563	0.369673	19	GGGGGAAGGGAGGAGAGAGAGAAAGAGAGAGAGGAAGGGGG	AAAAAAAAAAGGCAAAAAA	+
motif 1	DKDRRRRDDRARGARDGDGDGARARRRDRRRRRRRARRGRR	MA0473.3	-27	0.0044729	8.74899	0.369673	14	GGGGGAAGGGAGGAGAGAGAGAAAGAGAGAGAGGAAGGGGG	AAACAGGAAGTGGG	+
motif 2	WYYTTCTYYYTYTYTYTYTY	MA1404.1	2	2.44838e-08	4.78903e-05	7.7251e-05	20	TTCTTCTCTCTCTCTCTTTT	TCTCTCTCTCTCTCTCTCTCTCTC	-
motif 2	WYYTTCTYYYTYTYTYTYTY	MA1268.1	7	5.70361e-08	0.000111563	7.7251e-05	20	TTCTTCTCTCTCTCTCTTTT	TTTTCACTTTTTCTTTTTTTTTTTTTT	+
motif 2	WYYTTCTYYYTYTYTYTYTY	MA1402.1	1	5.96468e-08	0.000116669	7.7251e-05	20	TTCTTCTCTCTCTCTCTTTT	CTCTCTCTCTCTCTCTCTCTC	+
motif 2	WYYTTCTYYYTYTYTYTYTY	MA1416.1	-4	1.07223e-07	0.000209727	0.000104151	14	TTCTTCTCTCTCTCTCTTTT	TCTCTCTCTCTCTC	-
motif 2	WYYTTCTYYYTYTYTYTYTY	MA1403.1	1	3.54915e-07	0.000694214	0.000241656	20	TTCTTCTCTCTCTCTCTTTT	CTCTCTCTCTCTCTCTCTCTCTCTCTCTCT	-
motif 2	WYYTTCTYYYTYTYTYTYTY	MA1274.1	-1	3.99517e-07	0.000781456	0.000241656	19	TTCTTCTCTCTCTCTCTTTT	TTTACTTTTTTTTTTTTTTTT	+
motif 2	WYYTTCTYYYTYTYTYTYTY	MA1279.1	1	4.35369e-07	0.000851582	0.000241656	20	TTCTTCTCTCTCTCTCTTTT	TTTTCACTTTTTCTTTTTTTT	-
motif 2	WYYTTCTYYYTYTYTYTYTY	MA0205.2	-4	1.17443e-06	0.00229718	0.000555072	12	TTCTTCTCTCTCTCTCTTTT	TCTCTCTCTTTC	-
motif 2	WYYTTCTYYYTYTYTYTYTY	MA1281.1	1	1.28574e-06	0.00251491	0.000555072	20	TTCTTCTCTCTCTCTCTTTT	TTTTTTTTTTTTTACTTTTTT	-
motif 2	WYYTTCTYYYTYTYTYTYTY	MA1278.1	1	3.8649e-06	0.00755975	0.00150168	20	TTCTTCTCTCTCTCTCTTTT	TTTTTTTTTTTTTTACTTTTT	+
motif 2	WYYTTCTYYYTYTYTYTYTY	MA1267.1	3	4.47146e-06	0.00874617	0.00157941	20	TTCTTCTCTCTCTCTCTTTT	TTTTTTTTTTTTTTTACTTTTTTTTTTTT	+
motif 2	WYYTTCTYYYTYTYTYTYTY	MA1277.1	0	5.64021e-06	0.0110322	0.00182622	20	TTCTTCTCTCTCTCTCTTTT	TTTTTTTTACTTTTTCTTTTT	-
motif 2	WYYTTCTYYYTYTYTYTYTY	MA0543.1	-4	1.31972e-05	0.0258138	0.00394438	15	TTCTTCTCTCTCTCTCTTTT	TCTCTGCGTCTCTCT	-
motif 2	WYYTTCTYYYTYTYTYTYTY	MA0080.6	0	1.49433e-05	0.0292291	0.00414722	17	TTCTTCTCTCTCTCTCTTTT	TTCCACTTCCTCTTTTT	-
motif 2	WYYTTCTYYYTYTYTYTYTY	MA0081.2	-2	1.94949e-05	0.0381321	0.00481812	16	TTCTTCTCTCTCTCTCTTTT	TTTCACTTCCTCTTTT	+
motif 2	WYYTTCTYYYTYTYTYTYTY	MA0537.1	-1	1.98408e-05	0.0388086	0.00481812	11	TTCTTCTCTCTCTCTCTTTT	TTTTCACTTTT	-
motif 2	WYYTTCTYYYTYTYTYTYTY	MA1270.1	-1	2.30105e-05	0.0450085	0.00525915	19	TTCTTCTCTCTCTCTCTTTT	TTTACTTTTTGCTTTTTTT	+
motif 2	WYYTTCTYYYTYTYTYTYTY	MA0508.3	-3	2.7914e-05	0.0545998	0.00602543	11	TTCTTCTCTCTCTCTCTTTT	TTCTTTCTCTT	+
motif 2	WYYTTCTYYYTYTYTYTYTY	MA1159.1	0	3.11733e-05	0.060975	0.00637483	15	TTCTTCTCTCTCTCTCTTTT	TTTTTGTCTTTTTTT	-
motif 2	WYYTTCTYYYTYTYTYTYTY	MA1273.1	0	4.32062e-05	0.0845113	0.00839373	19	TTCTTCTCTCTCTCTCTTTT	TTTTTTGCCTTTTTTTTTT	-
motif 2	WYYTTCTYYYTYTYTYTYTY	MA1381.1	-4	7.01817e-05	0.137275	0.012985	15	TTCTTCTCTCTCTCTCTTTT	TCATTTTCACTCTCC	+
motif 2	WYYTTCTYYYTYTYTYTYTY	MA1823.1	-7	8.79715e-05	0.172072	0.0155367	12	TTCTTCTCTCTCTCTCTTTT	TTTTTTCTTTTT	-
motif 2	WYYTTCTYYYTYTYTYTYTY	MA0036.3	0	0.000201783	0.394688	0.0340875	11	TTCTTCTCTCTCTCTCTTTT	TTCTTATCTTT	+
motif 2	WYYTTCTYYYTYTYTYTYTY	MA0452.2	-2	0.000622625	1.21786	0.0967666	14	TTCTTCTCTCTCTCTCTTTT	TTTAACCCTTTTTC	+
motif 2	WYYTTCTYYYTYTYTYTYTY	MA1700.1	-4	0.000622625	1.21786	0.0967666	14	TTCTTCTCTCTCTCTCTTTT	TCTCTCGCTCGCTC	-
motif 2	WYYTTCTYYYTYTYTYTYTY	MA0687.1	-3	0.000717102	1.40265	0.107163	14	TTCTTCTCTCTCTCTCTTTT	TACTTCCTCTTTTT	-
motif 2	WYYTTCTYYYTYTYTYTYTY	MA1193.1	4	0.000744685	1.4566	0.107164	17	TTCTTCTCTCTCTCTCTTTT	CTTATCCTTATCCAATTTTTT	-
motif 2	WYYTTCTYYYTYTYTYTYTY	MA1623.1	0	0.000844981	1.65278	0.117254	13	TTCTTCTCTCTCTCTCTTTT	AGTTTCTGTTTCT	-
motif 2	WYYTTCTYYYTYTYTYTYTY	MA0482.2	1	0.00120406	2.35515	0.161321	11	TTCTTCTCTCTCTCTCTTTT	TTCCTTATCTTT	+
motif 2	WYYTTCTYYYTYTYTYTYTY	MA1790.1	-2	0.00128972	2.52269	0.167037	15	TTCTTCTCTCTCTCTCTTTT	CTTCTTCTTCACGCT	+
motif 2	WYYTTCTYYYTYTYTYTYTY	MA0037.4	1	0.00140034	2.73906	0.175513	11	TTCTTCTCTCTCTCTCTTTT	TTTCTTATCTGT	+
motif 2	WYYTTCTYYYTYTYTYTYTY	MA1158.1	0	0.00146861	2.8726	0.178318	20	TTCTTCTCTCTCTCTCTTTT	TTTTTTTTTGTCGTTTTCTG	-
motif 2	WYYTTCTYYYTYTYTYTYTY	MA1853.1	1	0.00155064	3.03305	0.182573	19	TTCTTCTCTCTCTCTCTTTT	TTTTTTCACTTCCGGTTTCC	-
motif 2	WYYTTCTYYYTYTYTYTYTY	MA1774.1	1	0.00163067	3.18959	0.186348	18	TTCTTCTCTCTCTCTCTTTT	CTTTTCCAACCACCTTTTT	+
motif 2	WYYTTCTYYYTYTYTYTYTY	MA0277.1	-10	0.0016942	3.31386	0.188077	9	TTCTTCTCTCTCTCTCTTTT	TTTCTTTTT	-
motif 2	WYYTTCTYYYTYTYTYTYTY	MA1156.1	0	0.00192347	3.76231	0.207597	20	TTCTTCTCTCTCTCTCTTTT	TTTTTTTTTGTCGTTTTCTG	+
motif 2	WYYTTCTYYYTYTYTYTYTY	MA1652.1	-3	0.00255223	4.99216	0.268013	14	TTCTTCTCTCTCTCTCTTTT	TTCTCACCTCCTCC	-
motif 2	WYYTTCTYYYTYTYTYTYTY	MA1970.1	1	0.00269981	5.28082	0.27605	11	TTCTTCTCTCTCTCTCTTTT	TATCTTATCTTT	+
motif 2	WYYTTCTYYYTYTYTYTYTY	MA1157.1	0	0.0027838	5.44512	0.27734	20	TTCTTCTCTCTCTCTCTTTT	TTTTTTTTTGTCGTTTTGTG	+
motif 2	WYYTTCTYYYTYTYTYTYTY	MA0598.3	-5	0.00306625	5.99759	0.292533	15	TTCTTCTCTCTCTCTCTTTT	CTCACTTCCTGTTTC	+
motif 2	WYYTTCTYYYTYTYTYTYTY	MA0149.1	-1	0.00308688	6.03793	0.292533	18	TTCTTCTCTCTCTCTCTTTT	CCTTCCTTCCTTCCTTCC	-
motif 2	WYYTTCTYYYTYTYTYTYTY	MA0761.2	-3	0.00349321	6.83273	0.323158	14	TTCTTCTCTCTCTCTCTTTT	TTCACTTCCTGTTT	-
motif 2	WYYTTCTYYYTYTYTYTYTY	MA1371.1	1	0.00410809	8.03543	0.371202	16	TTCTTCTCTCTCTCTCTTTT	TTTTTTGTCGTTTTGTG	-
motif 2	WYYTTCTYYYTYTYTYTYTY	MA0974.2	-3	0.00438881	8.5845	0.373144	12	TTCTTCTCTCTCTCTCTTTT	TTCACTTTTTAT	-
motif 2	WYYTTCTYYYTYTYTYTYTY	MA1160.1	0	0.0044177	8.64102	0.373144	20	TTCTTCTCTCTCTCTCTTTT	TTTTTTTTTGTCGTTTTGTG	+
motif 2	WYYTTCTYYYTYTYTYTYTY	MA1875.1	4	0.0044177	8.64102	0.373144	16	TTCTTCTCTCTCTCTCTTTT	AAATATCTTATCTTATTTTT	-
motif 3	TTTTTTTTTYTTTTT	MA1274.1	6	2.19284e-09	4.2892e-06	7.06175e-06	15	TTTTTTTTTTTTTTT	TTTACTTTTTTTTTTTTTTTT	+
motif 3	TTTTTTTTTYTTTTT	MA1267.1	0	3.6501e-09	7.13959e-06	7.06175e-06	15	TTTTTTTTTTTTTTT	TTTTTTTTTTTTTTTACTTTTTTTTTTTT	+
motif 3	TTTTTTTTTYTTTTT	MA1268.1	8	2.6362e-08	5.1564e-05	3.40012e-05	15	TTTTTTTTTTTTTTT	TTTTCACTTTTTCTTTTTTTTTTTTTT	+
motif 3	TTTTTTTTTYTTTTT	MA1278.1	-1	5.70248e-07	0.0011154	0.000482728	14	TTTTTTTTTTTTTTT	TTTTTTTTTTTTTTACTTTTT	+
motif 3	TTTTTTTTTYTTTTT	MA1823.1	-3	8.17902e-07	0.00159982	0.000482728	12	TTTTTTTTTTTTTTT	TTTTTTCTTTTT	-
motif 3	TTTTTTTTTYTTTTT	MA1281.1	5	8.73299e-07	0.00170817	0.000482728	15	TTTTTTTTTTTTTTT	TTTTTTTTTTTTTACTTTTTT	-
motif 3	TTTTTTTTTYTTTTT	MA1279.1	7	8.73299e-07	0.00170817	0.000482728	14	TTTTTTTTTTTTTTT	TTTTCACTTTTTCTTTTTTTT	-
motif 3	TTTTTTTTTYTTTTT	MA1871.1	3	2.01689e-06	0.00394504	0.000975506	15	TTTTTTTTTTTTTTT	TTTTTTTTTGTTTTTTTTTT	-
motif 3	TTTTTTTTTYTTTTT	MA1159.1	0	4.91664e-06	0.00961695	0.0021138	15	TTTTTTTTTTTTTTT	TTTTTGTCTTTTTTT	-
motif 3	TTTTTTTTTYTTTTT	MA1277.1	0	8.91685e-06	0.0174414	0.00345024	15	TTTTTTTTTTTTTTT	TTTTTTTTACTTTTTCTTTTT	-
motif 3	TTTTTTTTTYTTTTT	MA1125.1	-1	9.92828e-06	0.0194197	0.00349236	12	TTTTTTTTTTTTTTT	TTTTTTTTTAAA	-
motif 3	TTTTTTTTTYTTTTT	MA1866.1	5	1.94699e-05	0.0380832	0.006278	15	TTTTTTTTTTTTTTT	TTTTTGTTTGTTTTTTTTTT	-
motif 3	TTTTTTTTTYTTTTT	MA1156.1	2	3.42007e-05	0.0668966	0.0101796	15	TTTTTTTTTTTTTTT	TTTTTTTTTGTCGTTTTCTG	+
motif 3	TTTTTTTTTYTTTTT	MA1374.1	0	4.04105e-05	0.0790429	0.0111432	15	TTTTTTTTTTTTTTT	TTTTTTTGTCGTTTTGTG	-
motif 3	TTTTTTTTTYTTTTT	MA1158.1	2	4.31979e-05	0.084495	0.0111432	15	TTTTTTTTTTTTTTT	TTTTTTTTTGTCGTTTTCTG	-
motif 3	TTTTTTTTTYTTTTT	MA1863.1	3	5.03494e-05	0.0984835	0.01146	15	TTTTTTTTTTTTTTT	TTTTTTTTTGTTTTTTTAGT	+
motif 3	TTTTTTTTTYTTTTT	MA1917.1	5	5.03494e-05	0.0984835	0.01146	15	TTTTTTTTTTTTTTT	AAATTTTATTGTTTTTTTTT	+
motif 3	TTTTTTTTTYTTTTT	MA1160.1	2	5.85749e-05	0.114573	0.0125915	15	TTTTTTTTTTTTTTT	TTTTTTTTTGTCGTTTTGTG	+
motif 3	TTTTTTTTTYTTTTT	MA1157.1	2	6.80252e-05	0.133057	0.0138533	15	TTTTTTTTTTTTTTT	TTTTTTTTTGTCGTTTTGTG	+
motif 3	TTTTTTTTTYTTTTT	MA1273.1	3	8.31057e-05	0.162555	0.0160782	15	TTTTTTTTTTTTTTT	TTTTTTGCCTTTTTTTTTT	-
motif 3	TTTTTTTTTYTTTTT	MA1869.1	4	0.000140633	0.275079	0.0259123	15	TTTTTTTTTTTTTTT	TTTTTTTTGTTTATTTTTTT	+
motif 3	TTTTTTTTTYTTTTT	MA0277.1	-6	0.000154145	0.301508	0.0271109	9	TTTTTTTTTTTTTTT	TTTCTTTTT	-
motif 3	TTTTTTTTTYTTTTT	MA1862.1	2	0.000186494	0.364783	0.0313744	15	TTTTTTTTTTTTTTT	TTTTTTTTGTTTATTTATTT	+
motif 3	TTTTTTTTTYTTTTT	MA1870.1	4	0.000229812	0.449513	0.037051	15	TTTTTTTTTTTTTTT	TTTTGTTTGTTTATTTTTTT	-
motif 3	TTTTTTTTTYTTTTT	MA1371.1	-1	0.000250019	0.489037	0.0382409	14	TTTTTTTTTTTTTTT	TTTTTTGTCGTTTTGTG	-
motif 3	TTTTTTTTTYTTTTT	MA1270.1	5	0.000256959	0.502612	0.0382409	14	TTTTTTTTTTTTTTT	TTTACTTTTTGCTTTTTTT	+
motif 3	TTTTTTTTTYTTTTT	MA1205.1	-1	0.00031491	0.615965	0.0451295	14	TTTTTTTTTTTTTTT	TTTTTTCCTTTTTTGGAAA	-
motif 3	TTTTTTTTTYTTTTT	MA1916.1	5	0.000423179	0.827739	0.0584796	15	TTTTTTTTTTTTTTT	AAATTCTATTGTTTTTTTTT	+
motif 3	TTTTTTTTTYTTTTT	MA0679.2	1	0.000489073	0.956627	0.0652549	15	TTTTTTTTTTTTTTT	TATTTATTGATTTTTT	-
motif 3	TTTTTTTTTYTTTTT	MA1699.1	1	0.0005211	1.01927	0.0672106	15	TTTTTTTTTTTTTTT	AATTATCGATTTTTTT	-
motif 3	TTTTTTTTTYTTTTT	MA1867.1	0	0.000587216	1.14859	0.0732949	15	TTTTTTTTTTTTTTT	TTTTTTTTGTTTACATAACA	+
motif 3	TTTTTTTTTYTTTTT	MA0940.1	0	0.000664946	1.30064	0.0804034	13	TTTTTTTTTTTTTTT	TTTCCTTTTTTGG	-
motif 3	TTTTTTTTTYTTTTT	MA0554.1	-2	0.000880679	1.72261	0.099125	13	TTTTTTTTTTTTTTT	TTTTTCCATTTTTGG	+
motif 3	TTTTTTTTTYTTTTT	MA0537.1	-3	0.000882224	1.72563	0.099125	11	TTTTTTTTTTTTTTT	TTTTCACTTTT	-
motif 3	TTTTTTTTTYTTTTT	MA0559.1	-1	0.000922248	1.80392	0.099125	14	TTTTTTTTTTTTTTT	TTTTCCTTTTTTGG	-
motif 3	TTTTTTTTTYTTTTT	MA1280.1	-2	0.000922248	1.80392	0.099125	13	TTTTTTTTTTTTTTT	TTTTTAACTTTTTG	-
motif 3	TTTTTTTTTYTTTTT	MA0757.1	0	0.000982595	1.92196	0.102757	14	TTTTTTTTTTTTTTT	ATTATTGATTTTTT	-
motif 3	TTTTTTTTTYTTTTT	MA0555.1	-2	0.00103751	2.02937	0.105644	13	TTTTTTTTTTTTTTT	TTCTTTCCATTTTTGGTAAT	-
motif 3	TTTTTTTTTYTTTTT	MA0041.2	1	0.00116353	2.27586	0.114761	15	TTTTTTTTTTTTTTT	ATTGTTTATTTACTTT	-
motif 3	TTTTTTTTTYTTTTT	MA1688.1	-1	0.00118636	2.32051	0.114761	14	TTTTTTTTTTTTTTT	TTTCTTGTCTTGTT	-
motif 3	TTTTTTTTTYTTTTT	MA1865.1	4	0.00149692	2.92798	0.141271	15	TTTTTTTTTTTTTTT	TTTTGTTTGTTTGTTTTTTT	+
motif 3	TTTTTTTTTYTTTTT	MA1104.2	0	0.00157836	3.08728	0.14541	13	TTTTTTTTTTTTTTT	TTATCTTATCTTT	+
motif 3	TTTTTTTTTYTTTTT	MA0377.1	3	0.00171368	3.35196	0.154205	15	TTTTTTTTTTTTTTT	TTTTATTTCTTCTATTCTCTA	-
motif 3	TTTTTTTTTYTTTTT	MA1864.1	5	0.00179196	3.50507	0.157584	15	TTTTTTTTTTTTTTT	TTTTGTTTATTTATTTATAT	-
motif 3	TTTTTTTTTYTTTTT	MA1370.1	-2	0.00197993	3.87275	0.169559	13	TTTTTTTTTTTTTTT	TTTTTGTCGTTTTGTG	+
motif 3	TTTTTTTTTYTTTTT	MA1918.1	4	0.00201786	3.94693	0.169559	15	TTTTTTTTTTTTTTT	AAATACCATTGTTTTTTTTT	+
motif 3	TTTTTTTTTYTTTTT	MA1607.1	-1	0.00205959	4.02856	0.169559	14	TTTTTTTTTTTTTTT	TTTGTTTACATATT	-
motif 3	TTTTTTTTTYTTTTT	MA1872.1	5	0.00255135	4.99045	0.201471	15	TTTTTTTTTTTTTTT	TATAAACATGTTTTTGTTTT	+
motif 3	TTTTTTTTTYTTTTT	MA1873.1	3	0.00255135	4.99045	0.201471	15	TTTTTTTTTTTTTTT	TTTTATTGTTTATATATTTT	+
motif 3	TTTTTTTTTYTTTTT	MA1204.1	1	0.00273694	5.35346	0.203642	15	TTTTTTTTTTTTTTT	TTTTTCCATTTTTGGTAA	-
motif 3	TTTTTTTTTYTTTTT	MA0558.1	-1	0.00275058	5.38013	0.203642	14	TTTTTTTTTTTTTTT	TTCTTTCTATTTTTGGAAATT	-
motif 3	TTTTTTTTTYTTTTT	MA0851.1	2	0.00276529	5.40892	0.203642	15	TTTTTTTTTTTTTTT	GTGTTTGTTTACTTTTT	-
motif 3	TTTTTTTTTYTTTTT	MA1366.1	1	0.00278937	5.45601	0.203642	15	TTTTTTTTTTTTTTT	TTTAATTTTTTACCGT	-
motif 3	TTTTTTTTTYTTTTT	MA1292.1	0	0.00286614	5.60617	0.205372	15	TTTTTTTTTTTTTTT	TTTACCTAATTTTTT	-
motif 3	TTTTTTTTTYTTTTT	MA1970.1	-1	0.00301316	5.89374	0.211981	12	TTTTTTTTTTTTTTT	TATCTTATCTTT	+
motif 3	TTTTTTTTTYTTTTT	MA1208.1	-1	0.00312092	6.10452	0.215642	14	TTTTTTTTTTTTTTT	TTTTTTACCGTTTT	+
motif 3	TTTTTTTTTYTTTTT	MA1440.1	-2	0.00350924	6.86407	0.238219	8	TTTTTTTTTTTTTTT	TTGTTTTT	-
motif 3	TTTTTTTTTYTTTTT	MA1989.1	-1	0.00371554	7.26759	0.247874	14	TTTTTTTTTTTTTTT	TTCTTGTGGTTTTT	-
motif 3	TTTTTTTTTYTTTTT	MA0465.2	0	0.00389218	7.6131	0.255257	12	TTTTTTTTTTTTTTT	TTTTTATTGCTT	-
motif 3	TTTTTTTTTYTTTTT	MA1373.1	0	0.00400906	7.84172	0.258541	15	TTTTTTTTTTTTTTT	TTTTGTCGTTTTGTG	-
motif 3	TTTTTTTTTYTTTTT	MA0442.2	-3	0.00496615	9.71379	0.302572	11	TTTTTTTTTTTTTTT	TTCTTTGTTTT	-
motif 3	TTTTTTTTTYTTTTT	MA1606.1	-1	0.00496615	9.71379	0.302572	11	TTTTTTTTTTTTTTT	TTTGTTTACAT	-
motif 3	TTTTTTTTTYTTTTT	MA0157.3	0	0.00500462	9.78903	0.302572	12	TTTTTTTTTTTTTTT	TTTTGTTTACAT	-
motif 3	TTTTTTTTTYTTTTT	MA0846.1	-1	0.00500462	9.78903	0.302572	12	TTTTTTTTTTTTTTT	TTTGTTTACTTA	-
motif 4	CMMCHVCAMCAMCMM	MA0073.1	2	1.04302e-07	0.000204014	0.000404354	15	CAACACCACCAACCA	CCCCAAACCACCCCCCCCCA	+
motif 4	CMMCHVCAMCAMCMM	MA1779.1	-5	5.10282e-06	0.00998111	0.00989121	10	CAACACCACCAACCA	CCACCAACCAC	+
motif 4	CMMCHVCAMCAMCMM	MA2041.1	-1	1.11424e-05	0.0217945	0.0127489	14	CAACACCACCAACCA	ATACCCACCAACCAAA	+
motif 4	CMMCHVCAMCAMCMM	MA2042.1	-1	1.52607e-05	0.02985	0.0127489	14	CAACACCACCAACCA	ATCTCCACCAACCCCAA	+
motif 4	CMMCHVCAMCAMCMM	MA1865.1	2	1.64427e-05	0.0321619	0.0127489	15	CAACACCACCAACCA	AAAAAAACAAACAAACAAAA	-
motif 4	CMMCHVCAMCAMCMM	MA1890.1	6	6.41024e-05	0.125384	0.0379342	15	CAACACCACCAACCA	CCCCCCCCACGCCCCCCCCCCC	+
motif 4	CMMCHVCAMCAMCMM	MA1891.1	5	6.84951e-05	0.133976	0.0379342	15	CAACACCACCAACCA	CCCTGCCACGCCCAAACCCC	+
motif 4	CMMCHVCAMCAMCMM	MA1893.1	3	0.000149724	0.29286	0.0725556	15	CAACACCACCAACCA	CCCCGCCACGCCCACCCCCC	+
motif 4	CMMCHVCAMCAMCMM	MA1768.1	2	0.000173775	0.339903	0.0748538	13	CAACACCACCAACCA	TTCCCAACCACCAAC	+
motif 4	CMMCHVCAMCAMCMM	MA1866.1	4	0.000202502	0.396094	0.0785054	15	CAACACCACCAACCA	AAAAAAAAAACAAACAAAAA	+
motif 4	CMMCHVCAMCAMCMM	MA1260.1	8	0.000249064	0.487169	0.0832572	13	CAACACCACCAACCA	TCCACCGACACCACCACCACC	-
motif 4	CMMCHVCAMCAMCMM	MA1039.1	-6	0.000257711	0.504083	0.0832572	8	CAACACCACCAACCA	CACCTACC	-
motif 4	CMMCHVCAMCAMCMM	MA1248.1	4	0.000338739	0.662573	0.0973013	15	CAACACCACCAACCA	CCACCACCACCTCCACCGAC	+
motif 4	CMMCHVCAMCAMCMM	MA1871.1	4	0.000364063	0.712108	0.0973013	15	CAACACCACCAACCA	AAAAAAAAAACAAAAAAAAA	+
motif 4	CMMCHVCAMCAMCMM	MA1775.1	-3	0.000376478	0.736392	0.0973013	12	CAACACCACCAACCA	CTCCACCTACCAT	+
motif 4	CMMCHVCAMCAMCMM	MA1263.1	-2	0.000483042	0.944831	0.11704	13	CAACACCACCAACCA	CCTCCACCGACCAT	-
motif 4	CMMCHVCAMCAMCMM	MA1863.1	1	0.000597398	1.16851	0.135027	15	CAACACCACCAACCA	ACTAAAAAAACAAAAAAAAA	-
motif 4	CMMCHVCAMCAMCMM	MA1107.2	0	0.000626935	1.22629	0.135027	15	CAACACCACCAACCA	CAGCCACACCCACCCC	+
motif 4	CMMCHVCAMCAMCMM	MA1656.1	-2	0.000741662	1.45069	0.149597	13	CAACACCACCAACCA	CCAAGCCCAACCAG	+
motif 4	CMMCHVCAMCAMCMM	MA2030.1	0	0.000806697	1.5779	0.149597	15	CAACACCACCAACCA	AACTCCCAACTACCAAC	+
motif 4	CMMCHVCAMCAMCMM	MA1738.1	1	0.000833658	1.63063	0.149597	14	CAACACCACCAACCA	CAACTACCAACTACC	+
motif 4	CMMCHVCAMCAMCMM	MA1627.1	0	0.000853347	1.66915	0.149597	14	CAACACCACCAACCA	CCCCTCCCCCACAC	+
motif 4	CMMCHVCAMCAMCMM	MA1990.1	-3	0.000914905	1.78955	0.149597	12	CAACACCACCAACCA	CGAGACCACCCAGG	+
motif 4	CMMCHVCAMCAMCMM	MA1251.1	3	0.000954802	1.86759	0.149597	15	CAACACCACCAACCA	CTTCATCACCACCGACAAT	+
motif 4	CMMCHVCAMCAMCMM	MA1892.1	5	0.000964705	1.88696	0.149597	15	CAACACCACCAACCA	CCCCGCCACGCCCACCCCCC	+
motif 4	CMMCHVCAMCAMCMM	MA1219.2	-3	0.00105064	2.05506	0.156658	12	CAACACCACCAACCA	CATCACCGACCAAA	+
motif 4	CMMCHVCAMCAMCMM	MA0493.2	-6	0.00111192	2.17492	0.159654	9	CAACACCACCAACCA	CCCCGCCCC	-
motif 4	CMMCHVCAMCAMCMM	MA1868.1	2	0.00117908	2.30628	0.163251	15	CAACACCACCAACCA	CACAAAAAAACATCCTACTT	-
motif 4	CMMCHVCAMCAMCMM	MA1795.1	-6	0.00152877	2.99027	0.204368	9	CAACACCACCAACCA	CACCGACCAT	+
motif 4	CMMCHVCAMCAMCMM	MA1229.1	-2	0.00184266	3.60424	0.232701	13	CAACACCACCAACCA	ACTCCACCGACAATT	-
motif 4	CMMCHVCAMCAMCMM	MA0753.2	0	0.00186076	3.63965	0.232701	13	CAACACCACCAACCA	CCGCCCCCCCCAC	+
motif 4	CMMCHVCAMCAMCMM	MA1914.1	1	0.00198666	3.8859	0.238726	15	CAACACCACCAACCA	CCCCATGCACCTGCCCCCCC	+
motif 4	CMMCHVCAMCAMCMM	MA0268.1	-2	0.00203209	3.97477	0.238726	7	CAACACCACCAACCA	ACCCCAC	+
motif 4	CMMCHVCAMCAMCMM	MA1023.1	-6	0.00220489	4.31276	0.247273	8	CAACACCACCAACCA	CACCGACA	-
motif 4	CMMCHVCAMCAMCMM	MA1709.1	-1	0.00223241	4.3666	0.247273	14	CAACACCACCAACCA	AGCAACAGAAACCTA	+
motif 4	CMMCHVCAMCAMCMM	MA1007.1	-6	0.00241921	4.73197	0.260519	8	CAACACCACCAACCA	CACCGACA	-
motif 4	CMMCHVCAMCAMCMM	MA1971.1	1	0.00250172	4.89336	0.262123	13	CAACACCACCAACCA	GCAACGAAACCAGG	+
motif 4	CMMCHVCAMCAMCMM	MA1573.2	-2	0.00266855	5.21969	0.262667	13	CAACACCACCAACCA	ACTACAATTCCCAG	+
motif 4	CMMCHVCAMCAMCMM	MA1919.1	8	0.00267323	5.22883	0.262667	14	CAACACCACCAACCA	GCCCAATTTCACACCTCCCCCC	-
motif 4	CMMCHVCAMCAMCMM	MA1869.1	5	0.0027261	5.33225	0.262667	15	CAACACCACCAACCA	AAAAAAATAAACAAAAAAAA	-
motif 4	CMMCHVCAMCAMCMM	MA0162.4	0	0.00284567	5.56614	0.262667	14	CAACACCACCAACCA	CCACGCCCACGCCC	+
motif 4	CMMCHVCAMCAMCMM	MA1989.1	-1	0.00284567	5.56614	0.262667	14	CAACACCACCAACCA	AAAAACCACAAGAA	+
motif 4	CMMCHVCAMCAMCMM	MA1767.1	-5	0.00303043	5.92751	0.266179	10	CAACACCACCAACCA	CCAACAAACTT	+
motif 4	CMMCHVCAMCAMCMM	MA1222.1	1	0.00305639	5.9783	0.266179	14	CAACACCACCAACCA	CCACCTCCACCGCCA	+
motif 4	CMMCHVCAMCAMCMM	MA1564.1	-2	0.00308971	6.04346	0.266179	12	CAACACCACCAACCA	GCCACGCCCCCC	+
motif 4	CMMCHVCAMCAMCMM	MA0002.2	-2	0.00350422	6.85426	0.295327	11	CAACACCACCAACCA	AAACCACAGAC	-
motif 4	CMMCHVCAMCAMCMM	MA2024.1	-4	0.00363181	7.10383	0.299568	11	CAACACCACCAACCA	TCCACCTACCACC	+
motif 4	CMMCHVCAMCAMCMM	MA1959.1	-6	0.00403003	7.88273	0.319953	9	CAACACCACCAACCA	CCCCGCCCC	-
motif 4	CMMCHVCAMCAMCMM	MA2012.1	-5	0.00404402	7.91009	0.319953	10	CAACACCACCAACCA	CCACCGACAAT	+
motif 4	CMMCHVCAMCAMCMM	MA1921.1	7	0.0043909	8.5886	0.336459	15	CAACACCACCAACCA	GGTGTTATCACACCTCTCCCCA	-
motif 4	CMMCHVCAMCAMCMM	MA1243.1	0	0.00448407	8.77083	0.336459	15	CAACACCACCAACCA	CACCTCCACCGACATTA	+
motif 4	CMMCHVCAMCAMCMM	MA0986.1	-6	0.004513	8.82743	0.336459	8	CAACACCACCAACCA	CACCGACA	+
motif 5	BYTTTCYYTYYYTCT	MA1402.1	3	1.28336e-06	0.00251026	0.00237771	15	TTTTTCTTTCTCTCT	CTCTCTCTCTCTCTCTCTCTC	+
motif 5	BYTTTCYYTYYYTCT	MA1404.1	2	1.28927e-06	0.00252181	0.00237771	15	TTTTTCTTTCTCTCT	TCTCTCTCTCTCTCTCTCTCTCTC	-
motif 5	BYTTTCYYTYYYTCT	MA0205.2	-2	1.93562e-06	0.00378607	0.00237771	12	TTTTTCTTTCTCTCT	TCTCTCTCTTTC	-
motif 5	BYTTTCYYTYYYTCT	MA1416.1	0	2.44909e-06	0.00479042	0.00237771	14	TTTTTCTTTCTCTCT	TCTCTCTCTCTCTC	-
motif 5	BYTTTCYYTYYYTCT	MA1268.1	7	4.3507e-06	0.00850996	0.00337911	15	TTTTTCTTTCTCTCT	TTTTCACTTTTTCTTTTTTTTTTTTTT	+
motif 5	BYTTTCYYTYYYTCT	MA0508.3	-3	7.08115e-06	0.0138507	0.00400006	11	TTTTTCTTTCTCTCT	TTCTTTCTCTT	+
motif 5	BYTTTCYYTYYYTCT	MA1403.1	15	7.21026e-06	0.0141033	0.00400006	15	TTTTTCTTTCTCTCT	CTCTCTCTCTCTCTCTCTCTCTCTCTCTCT	-
motif 5	BYTTTCYYTYYYTCT	MA0543.1	0	1.25765e-05	0.0245996	0.00610497	15	TTTTTCTTTCTCTCT	TCTCTGCGTCTCTCT	-
motif 5	BYTTTCYYTYYYTCT	MA1274.1	6	2.02804e-05	0.0396685	0.00875082	15	TTTTTCTTTCTCTCT	TTTACTTTTTTTTTTTTTTTT	+
motif 5	BYTTTCYYTYYYTCT	MA1279.1	7	2.64351e-05	0.0517071	0.0102659	14	TTTTTCTTTCTCTCT	TTTTCACTTTTTCTTTTTTTT	-
motif 5	BYTTTCYYTYYYTCT	MA1281.1	1	3.73525e-05	0.0730615	0.0131869	15	TTTTTCTTTCTCTCT	TTTTTTTTTTTTTACTTTTTT	-
motif 5	BYTTTCYYTYYYTCT	MA0537.1	-1	4.11579e-05	0.0805049	0.0133194	11	TTTTTCTTTCTCTCT	TTTTCACTTTT	-
motif 5	BYTTTCYYTYYYTCT	MA1823.1	-3	4.70945e-05	0.0921169	0.0140683	12	TTTTTCTTTCTCTCT	TTTTTTCTTTTT	-
motif 5	BYTTTCYYTYYYTCT	MA1278.1	-1	7.27755e-05	0.142349	0.020187	14	TTTTTCTTTCTCTCT	TTTTTTTTTTTTTTACTTTTT	+
motif 5	BYTTTCYYTYYYTCT	MA1270.1	5	8.24815e-05	0.161334	0.021354	14	TTTTTCTTTCTCTCT	TTTACTTTTTGCTTTTTTT	+
motif 5	BYTTTCYYTYYYTCT	MA1267.1	3	0.000103797	0.203026	0.0251929	15	TTTTTCTTTCTCTCT	TTTTTTTTTTTTTTTACTTTTTTTTTTTT	+
motif 5	BYTTTCYYTYYYTCT	MA1277.1	4	0.00012727	0.24894	0.029073	15	TTTTTCTTTCTCTCT	TTTTTTTTACTTTTTCTTTTT	-
motif 5	BYTTTCYYTYYYTCT	MA0277.1	-2	0.000225059	0.440216	0.0485555	9	TTTTTCTTTCTCTCT	TTTCTTTTT	-
motif 5	BYTTTCYYTYYYTCT	MA0149.1	3	0.000255451	0.499663	0.0522118	15	TTTTTCTTTCTCTCT	CCTTCCTTCCTTCCTTCC	-
motif 5	BYTTTCYYTYYYTCT	MA0081.2	0	0.00029493	0.576883	0.0572669	15	TTTTTCTTTCTCTCT	TTTCACTTCCTCTTTT	+
motif 5	BYTTTCYYTYYYTCT	MA0559.1	-1	0.000336235	0.657675	0.0621781	14	TTTTTCTTTCTCTCT	TTTTCCTTTTTTGG	-
motif 5	BYTTTCYYTYYYTCT	MA1381.1	-2	0.000443054	0.866613	0.0782074	13	TTTTTCTTTCTCTCT	TCATTTTCACTCTCC	+
motif 5	BYTTTCYYTYYYTCT	MA1159.1	2	0.000546189	1.06834	0.0922208	13	TTTTTCTTTCTCTCT	TTTTTGTCTTTTTTT	-
motif 5	BYTTTCYYTYYYTCT	MA0482.2	-3	0.000686182	1.34217	0.111031	12	TTTTTCTTTCTCTCT	TTCCTTATCTTT	+
motif 5	BYTTTCYYTYYYTCT	MA1273.1	1	0.000752635	1.47215	0.116912	15	TTTTTCTTTCTCTCT	TTTTTTGCCTTTTTTTTTT	-
motif 5	BYTTTCYYTYYYTCT	MA0136.3	-3	0.000797154	1.55923	0.119065	12	TTTTTCTTTCTCTCT	TCACTTCCTTCT	-
motif 5	BYTTTCYYTYYYTCT	MA1700.1	0	0.000841824	1.64661	0.12108	14	TTTTTCTTTCTCTCT	TCTCTCGCTCGCTC	-
motif 5	BYTTTCYYTYYYTCT	MA1371.1	1	0.000978106	1.91317	0.135657	15	TTTTTCTTTCTCTCT	TTTTTTGTCGTTTTGTG	-
motif 5	BYTTTCYYTYYYTCT	MA1156.1	4	0.00105614	2.0658	0.141428	15	TTTTTCTTTCTCTCT	TTTTTTTTTGTCGTTTTCTG	+
motif 5	BYTTTCYYTYYYTCT	MA0452.2	0	0.00110347	2.15838	0.142841	14	TTTTTCTTTCTCTCT	TTTAACCCTTTTTC	+
motif 5	BYTTTCYYTYYYTCT	MA1158.1	4	0.00146854	2.87246	0.180637	15	TTTTTCTTTCTCTCT	TTTTTTTTTGTCGTTTTCTG	-
motif 5	BYTTTCYYTYYYTCT	MA0442.2	-3	0.00148848	2.91147	0.180637	11	TTTTTCTTTCTCTCT	TTCTTTGTTTT	-
motif 5	BYTTTCYYTYYYTCT	MA1916.1	5	0.0015671	3.06524	0.184415	15	TTTTTCTTTCTCTCT	AAATTCTATTGTTTTTTTTT	+
motif 5	BYTTTCYYTYYYTCT	MA0851.1	1	0.00164552	3.21864	0.187949	15	TTTTTCTTTCTCTCT	GTGTTTGTTTACTTTTT	-
motif 5	BYTTTCYYTYYYTCT	MA1723.1	2	0.00193843	3.79157	0.208764	15	TTTTTCTTTCTCTCT	CCTTCTGCTTCCTCCCTGCCCACC	-
motif 5	BYTTTCYYTYYYTCT	MA1374.1	2	0.00196558	3.84467	0.208764	15	TTTTTCTTTCTCTCT	TTTTTTTGTCGTTTTGTG	-
motif 5	BYTTTCYYTYYYTCT	MA0940.1	-2	0.00198904	3.89055	0.208764	13	TTTTTCTTTCTCTCT	TTTCCTTTTTTGG	-
motif 5	BYTTTCYYTYYYTCT	MA0080.6	0	0.00211874	4.14427	0.216526	15	TTTTTCTTTCTCTCT	TTCCACTTCCTCTTTTT	-
motif 5	BYTTTCYYTYYYTCT	MA1157.1	4	0.0022987	4.49626	0.228893	15	TTTTTCTTTCTCTCT	TTTTTTTTTGTCGTTTTGTG	+
motif 5	BYTTTCYYTYYYTCT	MA0761.2	-1	0.00240878	4.71158	0.230681	14	TTTTTCTTTCTCTCT	TTCACTTCCTGTTT	-
motif 5	BYTTTCYYTYYYTCT	MA1373.1	-1	0.00246852	4.82843	0.230681	14	TTTTTCTTTCTCTCT	TTTTGTCGTTTTGTG	-
motif 5	BYTTTCYYTYYYTCT	MA1370.1	0	0.00249486	4.87995	0.230681	15	TTTTTCTTTCTCTCT	TTTTTGTCGTTTTGTG	+
motif 5	BYTTTCYYTYYYTCT	MA1652.1	-1	0.00256542	5.01796	0.231688	14	TTTTTCTTTCTCTCT	TTCTCACCTCCTCC	-
motif 5	BYTTTCYYTYYYTCT	MA0471.2	-1	0.00275459	5.38797	0.243118	13	TTTTTCTTTCTCTCT	CCTTCCCGCCCCC	-
motif 5	BYTTTCYYTYYYTCT	MA1160.1	4	0.00313664	6.13527	0.270687	15	TTTTTCTTTCTCTCT	TTTTTTTTTGTCGTTTTGTG	+
motif 5	BYTTTCYYTYYYTCT	MA1623.1	0	0.00333571	6.52465	0.281608	13	TTTTTCTTTCTCTCT	AGTTTCTGTTTCT	-
motif 5	BYTTTCYYTYYYTCT	MA1275.1	-2	0.00354885	6.94155	0.293227	11	TTTTTCTTTCTCTCT	TTACTTTTTCT	-
motif 5	BYTTTCYYTYYYTCT	MA0869.2	-3	0.0042242	8.26253	0.341757	12	TTTTTCTTTCTCTCT	TCCTTTGTTCTC	-
motif 6	AAAAWAAAWAAAWWWAAAAWA	MA1274.1	0	6.61352e-09	1.29361e-05	2.28606e-05	21	AAAATAAAAAAAAAAAAAAAA	AAAAAAAAAAAAAAAAGTAAA	-
motif 6	AAAAWAAAWAAAWWWAAAAWA	MA1281.1	0	1.43644e-08	2.80967e-05	2.28606e-05	21	AAAATAAAAAAAAAAAAAAAA	AAAAAAGTAAAAAAAAAAAAA	+
motif 6	AAAAWAAAWAAAWWWAAAAWA	MA1871.1	-1	2.34146e-08	4.57989e-05	2.28606e-05	20	AAAATAAAAAAAAAAAAAAAA	AAAAAAAAAACAAAAAAAAA	+
motif 6	AAAAWAAAWAAAWWWAAAAWA	MA1268.1	-1	2.38493e-08	4.66493e-05	2.28606e-05	20	AAAATAAAAAAAAAAAAAAAA	AAAAAAAAAAAAAAGAAAAAGTGAAAA	-
motif 6	AAAAWAAAWAAAWWWAAAAWA	MA1277.1	0	5.21969e-08	0.000102097	3.80233e-05	21	AAAATAAAAAAAAAAAAAAAA	AAAAAGAAAAAGTAAAAAAAA	+
motif 6	AAAAWAAAWAAAWWWAAAAWA	MA1267.1	9	5.95018e-08	0.000116385	3.80233e-05	20	AAAATAAAAAAAAAAAAAAAA	AAAAAAAAAAAAGTAAAAAAAAAAAAAAA	-
motif 6	AAAAWAAAWAAAWWWAAAAWA	MA1870.1	-1	2.60093e-07	0.000508741	0.000142463	20	AAAATAAAAAAAAAAAAAAAA	AAAAAAATAAACAAACAAAA	+
motif 6	AAAAWAAAWAAAWWWAAAAWA	MA1862.1	-1	3.36868e-07	0.000658914	0.000161451	20	AAAATAAAAAAAAAAAAAAAA	AAATAAATAAACAAAAAAAA	-
motif 6	AAAAWAAAWAAAWWWAAAAWA	MA1279.1	0	7.59236e-07	0.00148506	0.000286199	21	AAAATAAAAAAAAAAAAAAAA	AAAAAAAAGAAAAAGTGAAAA	+
motif 6	AAAAWAAAWAAAWWWAAAAWA	MA1873.1	0	7.78097e-07	0.00152196	0.000286199	20	AAAATAAAAAAAAAAAAAAAA	AAAATATATAAACAATAAAA	-
motif 6	AAAAWAAAWAAAWWWAAAAWA	MA1278.1	0	8.21088e-07	0.00160605	0.000286199	21	AAAATAAAAAAAAAAAAAAAA	AAAAAGTAAAAAAAAAAAAAA	-
motif 6	AAAAWAAAWAAAWWWAAAAWA	MA1866.1	0	1.26363e-06	0.00247166	0.000403747	20	AAAATAAAAAAAAAAAAAAAA	AAAAAAAAAACAAACAAAAA	+
motif 6	AAAAWAAAWAAAWWWAAAAWA	MA1864.1	-1	1.73402e-06	0.00339174	0.000511425	20	AAAATAAAAAAAAAAAAAAAA	ATATAAATAAATAAACAAAA	+
motif 6	AAAAWAAAWAAAWWWAAAAWA	MA1869.1	-1	1.87523e-06	0.00366794	0.000513567	20	AAAATAAAAAAAAAAAAAAAA	AAAAAAATAAACAAAAAAAA	-
motif 6	AAAAWAAAWAAAWWWAAAAWA	MA1273.1	-1	5.17507e-06	0.0101224	0.00131785	19	AAAATAAAAAAAAAAAAAAAA	AAAAAAAAAAGGCAAAAAA	+
motif 6	AAAAWAAAWAAAWWWAAAAWA	MA1924.1	0	5.8431e-06	0.0114291	0.00131785	20	AAAATAAAAAAAAAAAAAAAA	TAAAATTAATTAAATAAAAA	+
motif 6	AAAAWAAAWAAAWWWAAAAWA	MA1863.1	0	5.8431e-06	0.0114291	0.00131785	20	AAAATAAAAAAAAAAAAAAAA	ACTAAAAAAACAAAAAAAAA	-
motif 6	AAAAWAAAWAAAWWWAAAAWA	MA1883.1	0	7.27515e-06	0.0142302	0.00154968	20	AAAATAAAAAAAAAAAAAAAA	AAAAATTAATTAATTAAAAA	-
motif 6	AAAAWAAAWAAAWWWAAAAWA	MA1925.1	0	1.28917e-05	0.0252161	0.00260152	20	AAAATAAAAAAAAAAAAAAAA	AAAAATTAATTAATTAAATT	-
motif 6	AAAAWAAAWAAAWWWAAAAWA	MA1917.1	-2	1.38302e-05	0.0270519	0.00265137	19	AAAATAAAAAAAAAAAAAAAA	AAAAAAAAACAATAAAATTT	-
motif 6	AAAAWAAAWAAAWWWAAAAWA	MA1159.1	0	3.66641e-05	0.0717149	0.00669411	15	AAAATAAAAAAAAAAAAAAAA	AAAAAAAGACAAAAA	+
motif 6	AAAAWAAAWAAAWWWAAAAWA	MA1881.1	0	4.10924e-05	0.0803768	0.00671556	20	AAAATAAAAAAAAAAAAAAAA	AAAAATTAATTAATTAAATC	-
motif 6	AAAAWAAAWAAAWWWAAAAWA	MA1366.1	0	4.12886e-05	0.0807606	0.00671556	16	AAAATAAAAAAAAAAAAAAAA	ACGGTAAAAAAATAAA	+
motif 6	AAAAWAAAWAAAWWWAAAAWA	MA1125.1	-2	4.2036e-05	0.0822225	0.00671556	12	AAAATAAAAAAAAAAAAAAAA	TTTAAAAAAAAA	+
motif 6	AAAAWAAAWAAAWWWAAAAWA	MA1823.1	0	6.65924e-05	0.130255	0.00947148	12	AAAATAAAAAAAAAAAAAAAA	AAAAAGAAAAAA	+
motif 6	AAAAWAAAWAAAWWWAAAAWA	MA1158.1	0	6.91679e-05	0.135292	0.00947148	20	AAAATAAAAAAAAAAAAAAAA	CAGAAAACGACAAAAAAAAA	+
motif 6	AAAAWAAAWAAAWWWAAAAWA	MA1907.1	-1	6.91679e-05	0.135292	0.00947148	20	AAAATAAAAAAAAAAAAAAAA	AATTAAATTAATTAAATTAA	+
motif 6	AAAAWAAAWAAAWWWAAAAWA	MA1896.1	1	6.91679e-05	0.135292	0.00947148	19	AAAATAAAAAAAAAAAAAAAA	AAAAATTAATTAATTAATTT	-
motif 6	AAAAWAAAWAAAWWWAAAAWA	MA1900.1	1	8.92329e-05	0.174539	0.0117977	19	AAAATAAAAAAAAAAAAAAAA	AATAATTAATTAATTATTAA	-
motif 6	AAAAWAAAWAAAWWWAAAAWA	MA1895.1	1	9.50454e-05	0.185909	0.0121261	19	AAAATAAAAAAAAAAAAAAAA	TTAAATTAATTAATTAAAAA	-
motif 6	AAAAWAAAWAAAWWWAAAAWA	MA0679.2	2	9.80418e-05	0.19177	0.0121261	14	AAAATAAAAAAAAAAAAAAAA	AAAAAATCAATAAATA	+
motif 6	AAAAWAAAWAAAWWWAAAAWA	MA1156.1	0	0.000107758	0.210775	0.0129113	20	AAAATAAAAAAAAAAAAAAAA	CAGAAAACGACAAAAAAAAA	-
motif 6	AAAAWAAAWAAAWWWAAAAWA	MA1157.1	-1	0.00014691	0.287357	0.016567	20	AAAATAAAAAAAAAAAAAAAA	CACAAAACGACAAAAAAAAA	-
motif 6	AAAAWAAAWAAAWWWAAAAWA	MA1904.1	1	0.000156202	0.305531	0.0171115	19	AAAATAAAAAAAAAAAAAAAA	AAAAATTAATTAATTAAAAT	-
motif 6	AAAAWAAAWAAAWWWAAAAWA	MA1844.1	1	0.000176469	0.345174	0.0187948	19	AAAATAAAAAAAAAAAAAAAA	TAAAATTAATTAATTAAAAT	-
motif 6	AAAAWAAAWAAAWWWAAAAWA	MA1889.1	-1	0.000199194	0.389624	0.0206418	20	AAAATAAAAAAAAAAAAAAAA	AATTAAATTAATTAAATTAA	+
motif 6	AAAAWAAAWAAAWWWAAAAWA	MA1865.1	-1	0.000224653	0.439422	0.0220861	20	AAAATAAAAAAAAAAAAAAAA	AAAAAAACAAACAAACAAAA	-
motif 6	AAAAWAAAWAAAWWWAAAAWA	MA1916.1	-1	0.000224653	0.439422	0.0220861	20	AAAATAAAAAAAAAAAAAAAA	AAAAAAAAACAATAGAATTT	-
motif 6	AAAAWAAAWAAAWWWAAAAWA	MA1879.1	1	0.000238502	0.466511	0.0228615	19	AAAATAAAAAAAAAAAAAAAA	AATAATTAATTAATTAATTA	-
motif 6	AAAAWAAAWAAAWWWAAAAWA	MA1160.1	-1	0.000268645	0.52547	0.0251227	20	AAAATAAAAAAAAAAAAAAAA	CACAAAACGACAAAAAAAAA	-
motif 6	AAAAWAAAWAAAWWWAAAAWA	MA0558.1	0	0.000316496	0.619067	0.0288929	21	AAAATAAAAAAAAAAAAAAAA	AATTTCCAAAAATAGAAAGAA	+
motif 6	AAAAWAAAWAAAWWWAAAAWA	MA1270.1	0	0.000343596	0.672073	0.0306373	19	AAAATAAAAAAAAAAAAAAAA	AAAAAAAGCAAAAAGTAAA	-
motif 6	AAAAWAAAWAAAWWWAAAAWA	MA1867.1	-1	0.000360431	0.705003	0.0314081	20	AAAATAAAAAAAAAAAAAAAA	TGTTATGTAAACAAAAAAAA	-
motif 6	AAAAWAAAWAAAWWWAAAAWA	MA1884.1	0	0.000428896	0.838921	0.0357492	20	AAAATAAAAAAAAAAAAAAAA	ATAATAATAATGATAATTAA	+
motif 6	AAAAWAAAWAAAWWWAAAAWA	MA1918.1	-2	0.000454313	0.888637	0.037062	19	AAAATAAAAAAAAAAAAAAAA	AAAAAAAAACAATGGTATTT	-
motif 6	AAAAWAAAWAAAWWWAAAAWA	MA1380.1	-4	0.000468032	0.91547	0.0373857	15	AAAATAAAAAAAAAAAAAAAA	TTAAAAAATTTAAAA	-
motif 6	AAAAWAAAWAAAWWWAAAAWA	MA1910.1	1	0.000539323	1.05492	0.0422011	19	AAAATAAAAAAAAAAAAAAAA	ATAAATTAATTAATTAAATT	-
motif 6	AAAAWAAAWAAAWWWAAAAWA	MA0377.1	3	0.000692352	1.35424	0.0517242	18	AAAATAAAAAAAAAAAAAAAA	TAGAGAATAGAAGAAATAAAA	+
motif 6	AAAAWAAAWAAAWWWAAAAWA	MA1385.1	0	0.000886846	1.73467	0.0629689	15	AAAATAAAAAAAAAAAAAAAA	AAAAGAATATTTTAA	-
motif 6	AAAAWAAAWAAAWWWAAAAWA	MA1882.1	1	0.00117343	2.29522	0.0797163	19	AAAATAAAAAAAAAAAAAAAA	TAAAATTAATTAATTATAAT	-
motif 6	AAAAWAAAWAAAWWWAAAAWA	MA1860.1	1	0.00118105	2.31013	0.0797163	21	AAAATAAAAAAAAAAAAAAAA	TATTAAGCAAATATTTACATAA	-
motif 6	AAAAWAAAWAAAWWWAAAAWA	MA1214.1	0	0.00118509	2.31803	0.0797163	21	AAAATAAAAAAAAAAAAAAAA	AAACCAATAATTGAAAATTAT	+
motif 6	AAAAWAAAWAAAWWWAAAAWA	MA1374.1	-1	0.00122979	2.40547	0.0804962	18	AAAATAAAAAAAAAAAAAAAA	CACAAAACGACAAAAAAA	+
motif 6	AAAAWAAAWAAAWWWAAAAWA	MA0555.1	-1	0.00123867	2.42284	0.0804962	20	AAAATAAAAAAAAAAAAAAAA	ATTACCAAAAAAGGAAAGAA	+
motif 6	AAAAWAAAWAAAWWWAAAAWA	MA1898.1	0	0.0013073	2.55708	0.0808454	20	AAAATAAAAAAAAAAAAAAAA	TAAAAAATCATTAATTATTA	-
motif 6	AAAAWAAAWAAAWWWAAAAWA	MA1875.1	1	0.0013073	2.55708	0.0808454	19	AAAATAAAAAAAAAAAAAAAA	AAAAATAAGATAAGATATTT	+
motif 6	AAAAWAAAWAAAWWWAAAAWA	MA0757.1	0	0.00133845	2.61802	0.0813717	14	AAAATAAAAAAAAAAAAAAAA	AAAAAATCAATAAT	+
motif 6	AAAAWAAAWAAAWWWAAAAWA	MA0846.1	0	0.00136355	2.6671	0.0813717	12	AAAATAAAAAAAAAAAAAAAA	TAAGTAAACAAA	+
motif 6	AAAAWAAAWAAAWWWAAAAWA	MA1905.1	1	0.00145537	2.84671	0.0845478	19	AAAATAAAAAAAAAAAAAAAA	AATAACTAATTAATTAAAAA	-
motif 6	AAAAWAAAWAAAWWWAAAAWA	MA1909.1	-1	0.00153516	3.00278	0.08656	20	AAAATAAAAAAAAAAAAAAAA	AATTAATTTAATTAAATTAA	+
motif 6	AAAAWAAAWAAAWWWAAAAWA	MA0041.2	0	0.00179393	3.50893	0.0971927	16	AAAATAAAAAAAAAAAAAAAA	AAAGTAAATAAACAAT	+
motif 6	AAAAWAAAWAAAWWWAAAAWA	MA1191.1	-4	0.00186168	3.64144	0.0989636	15	AAAATAAAAAAAAAAAAAAAA	TAAAAAAATATCTTA	+
motif 6	AAAAWAAAWAAAWWWAAAAWA	MA1280.1	1	0.0018842	3.68549	0.0989636	13	AAAATAAAAAAAAAAAAAAAA	CAAAAAGTTAAAAA	+
motif 6	AAAAWAAAWAAAWWWAAAAWA	MA1487.2	2	0.00215493	4.21505	0.111654	12	AAAATAAAAAAAAAAAAAAAA	CCTAAATAAACAAA	+
motif 6	AAAAWAAAWAAAWWWAAAAWA	MA0554.1	3	0.00226351	4.42742	0.114926	12	AAAATAAAAAAAAAAAAAAAA	CCAAAAATGGAAAAA	-
motif 6	AAAAWAAAWAAAWWWAAAAWA	MA1104.2	1	0.00227803	4.45582	0.114926	12	AAAATAAAAAAAAAAAAAAAA	AAAGATAAGATAA	-
motif 6	AAAAWAAAWAAAWWWAAAAWA	MA0578.1	-2	0.00259918	5.08399	0.127765	16	AAAATAAAAAAAAAAAAAAAA	AATAAGGTACATAAAA	-
motif 6	AAAAWAAAWAAAWWWAAAAWA	MA1903.1	-2	0.0027287	5.33735	0.131529	19	AAAATAAAAAAAAAAAAAAAA	TAAAAATCAATTAAAAACAA	+
motif 6	AAAAWAAAWAAAWWWAAAAWA	MA1161.1	-3	0.00274436	5.36797	0.131529	15	AAAATAAAAAAAAAAAAAAAA	ATTTTAAAATTTAAA	+
motif 6	AAAAWAAAWAAAWWWAAAAWA	MA1184.1	-5	0.00280663	5.48977	0.132853	14	AAAATAAAAAAAAAAAAAAAA	AAAAAAATATCTTA	+
motif 6	AAAAWAAAWAAAWWWAAAAWA	MA1699.1	-1	0.00293454	5.73995	0.136296	16	AAAATAAAAAAAAAAAAAAAA	AAAAAAATCGATAATT	+
motif 6	AAAAWAAAWAAAWWWAAAAWA	MA0277.1	1	0.00295047	5.77111	0.136296	8	AAAATAAAAAAAAAAAAAAAA	AAAAAGAAA	+
motif 6	AAAAWAAAWAAAWWWAAAAWA	MA1371.1	0	0.00352773	6.90024	0.15567	17	AAAATAAAAAAAAAAAAAAAA	CACAAAACGACAAAAAA	+
motif 6	AAAAWAAAWAAAWWWAAAAWA	MA0547.1	0	0.00353227	6.90912	0.15567	15	AAAATAAAAAAAAAAAAAAAA	AAAATGATGACAATT	+
motif 6	AAAAWAAAWAAAWWWAAAAWA	MA0681.2	-2	0.00372878	7.2935	0.160638	16	AAAATAAAAAAAAAAAAAAAA	TTTAATCAAATTATAT	+
motif 6	AAAAWAAAWAAAWWWAAAAWA	MA1205.1	-2	0.00398044	7.78574	0.169574	19	AAAATAAAAAAAAAAAAAAAA	TTTCCAAAAAAGGAAAAAA	+
motif 6	AAAAWAAAWAAAWWWAAAAWA	MA1872.1	0	0.00430019	8.41117	0.181183	20	AAAATAAAAAAAAAAAAAAAA	AAAACAAAAACATGTTTATA	-
motif 6	AAAAWAAAWAAAWWWAAAAWA	MA1886.1	0	0.00451923	8.83961	0.186487	20	AAAATAAAAAAAAAAAAAAAA	AAAAAAGCAATTAACATTAT	-
motif 6	AAAAWAAAWAAAWWWAAAAWA	MA1379.1	-5	0.00452335	8.84768	0.186487	15	AAAATAAAAAAAAAAAAAAAA	TTTTAAAATTTAAAT	+
motif 6	AAAAWAAAWAAAWWWAAAAWA	MA1851.1	3	0.00459026	8.97854	0.187232	19	AAAATAAAAAAAAAAAAAAAA	TTAAAAATAATTATCTTAAATA	-
motif 6	AAAAWAAAWAAAWWWAAAAWA	MA1606.1	-1	0.00489053	9.56588	0.195006	11	AAAATAAAAAAAAAAAAAAAA	ATGTAAACAAA	+
motif 6	AAAAWAAAWAAAWWWAAAAWA	MA0049.1	-1	0.00493343	9.6498	0.195006	10	AAAATAAAAAAAAAAAAAAAA	GCATAAAAAA	+
motif 6	AAAAWAAAWAAAWWWAAAAWA	MA1085.2	0	0.00493343	9.6498	0.195006	10	AAAATAAAAAAAAAAAAAAAA	AAAGTCAAAA	+
motif 7	TATATATATATATATATATATATATATATATATATATATAT	MA1864.1	-9	0.000154336	0.301881	0.301881	20	TATATATATATATATATATATATATATATATATATATATAT	ATATAAATAAATAAACAAAA	+
motif 7	TATATATATATATATATATATATATATATATATATATATAT	MA0379.1	-17	0.000416143	0.813975	0.406988	5	TATATATATATATATATATATATATATATATATATATATAT	ATATA	+
motif 7	TATATATATATATATATATATATATATATATATATATATAT	MA0015.1	-17	0.00203835	3.987	1	10	TATATATATATATATATATATATATATATATATATATATAT	GTATATATAC	+
motif 7	TATATATATATATATATATATATATATATATATATATATAT	MA1861.1	-17	0.00275025	5.37949	1	22	TATATATATATATATATATATATATATATATATATATATAT	AATTATGTAAATATTTACTTAA	+
motif 7	TATATATATATATATATATATATATATATATATATATATAT	MA0386.1	-4	0.00344474	6.73791	1	21	TATATATATATATATATATATATATATATATATATATATAT	ATCGAATATATATATCTAGTC	-
motif 7	TATATATATATATATATATATATATATATATATATATATAT	MA1873.1	-4	0.00492099	9.62546	1	20	TATATATATATATATATATATATATATATATATATATATAT	TTTTATTGTTTATATATTTT	+
motif 8	CMAVAVCMKASMTTCHCAVCAMHACCMCM	MA1354.1	0	0.000112621	0.220286	0.440069	29	CAAAAACCGACCTTCTCACCAAAACCCCC	CTAAACCCTAAACCCTAAACCCTAAACCC	+
motif 8	CMAVAVCMKASMTTCHCAVCAMHACCMCM	MA1919.1	-5	0.00028334	0.554214	0.553581	22	CAAAAACCGACCTTCTCACCAAAACCCCC	GCCCAATTTCACACCTCCCCCC	-
motif 8	CMAVAVCMKASMTTCHCAVCAMHACCMCM	MA0073.1	-11	0.000739122	1.44572	0.586817	18	CAAAAACCGACCTTCTCACCAAAACCCCC	CCCCAAACCACCCCCCCCCA	+
motif 8	CMAVAVCMKASMTTCHCAVCAMHACCMCM	MA1594.1	-4	0.00073929	1.44605	0.586817	24	CAAAAACCGACCTTCTCACCAAAACCCCC	AGGGGACATCACTACAGATCCCAC	+
motif 8	CMAVAVCMKASMTTCHCAVCAMHACCMCM	MA0406.1	-9	0.000835133	1.63352	0.586817	8	CAAAAACCGACCTTCTCACCAAAACCCCC	ACATTCCC	+
motif 8	CMAVAVCMKASMTTCHCAVCAMHACCMCM	MA0865.2	-12	0.00091435	1.78847	0.586817	12	CAAAAACCGACCTTCTCACCAAAACCCCC	TTCCCGCCAAAA	+
motif 8	CMAVAVCMKASMTTCHCAVCAMHACCMCM	MA1914.1	-1	0.00111835	2.1875	0.586817	20	CAAAAACCGACCTTCTCACCAAAACCCCC	CCCCATGCACCTGCCCCCCC	+
motif 8	CMAVAVCMKASMTTCHCAVCAMHACCMCM	MA0942.1	-5	0.00165923	3.24545	0.586817	8	CAAAAACCGACCTTCTCACCAAAACCCCC	ACCGACAT	+
motif 8	CMAVAVCMKASMTTCHCAVCAMHACCMCM	MA1007.1	-4	0.00165923	3.24545	0.586817	8	CAAAAACCGACCTTCTCACCAAAACCCCC	CACCGACA	-
motif 8	CMAVAVCMKASMTTCHCAVCAMHACCMCM	MA1911.1	-3	0.00187541	3.6683	0.586817	20	CAAAAACCGACCTTCTCACCAAAACCCCC	AAGGGGAAATTCCCCAACCC	-
motif 8	CMAVAVCMKASMTTCHCAVCAMHACCMCM	MA2041.1	-11	0.00191826	3.75211	0.586817	16	CAAAAACCGACCTTCTCACCAAAACCCCC	ATACCCACCAACCAAA	+
motif 8	CMAVAVCMKASMTTCHCAVCAMHACCMCM	MA1222.1	-15	0.00199642	3.90499	0.586817	14	CAAAAACCGACCTTCTCACCAAAACCCCC	CCACCTCCACCGCCA	+
motif 8	CMAVAVCMKASMTTCHCAVCAMHACCMCM	MA1779.1	-15	0.00204616	4.00229	0.586817	11	CAAAAACCGACCTTCTCACCAAAACCCCC	CCACCAACCAC	+
motif 8	CMAVAVCMKASMTTCHCAVCAMHACCMCM	MA2030.1	-12	0.00215196	4.20923	0.586817	17	CAAAAACCGACCTTCTCACCAAAACCCCC	AACTCCCAACTACCAAC	+
motif 8	CMAVAVCMKASMTTCHCAVCAMHACCMCM	MA1865.1	1	0.00234694	4.59062	0.586817	19	CAAAAACCGACCTTCTCACCAAAACCCCC	AAAAAAACAAACAAACAAAA	-
motif 8	CMAVAVCMKASMTTCHCAVCAMHACCMCM	MA1260.1	-2	0.00240281	4.69989	0.586817	21	CAAAAACCGACCTTCTCACCAAAACCCCC	TCCACCGACACCACCACCACC	-
motif 8	CMAVAVCMKASMTTCHCAVCAMHACCMCM	MA2042.1	-11	0.00258795	5.06202	0.594853	17	CAAAAACCGACCTTCTCACCAAAACCCCC	ATCTCCACCAACCCCAA	+
motif 8	CMAVAVCMKASMTTCHCAVCAMHACCMCM	MA1023.1	-4	0.00280006	5.47692	0.607852	8	CAAAAACCGACCTTCTCACCAAAACCCCC	CACCGACA	-
motif 8	CMAVAVCMKASMTTCHCAVCAMHACCMCM	MA1353.1	0	0.00296481	5.79918	0.609743	15	CAAAAACCGACCTTCTCACCAAAACCCCC	CTAAACCCTAAATCC	-
motif 8	CMAVAVCMKASMTTCHCAVCAMHACCMCM	MA1258.1	3	0.00331265	6.47954	0.647215	18	CAAAAACCGACCTTCTCACCAAAACCCCC	CCACCTCCACCGACATAACCA	-
motif 8	CMAVAVCMKASMTTCHCAVCAMHACCMCM	MA1250.1	-15	0.00383476	7.50079	0.707922	14	CAAAAACCGACCTTCTCACCAAAACCCCC	CCACCTCCACCGCCA	+
motif 8	CMAVAVCMKASMTTCHCAVCAMHACCMCM	MA1890.1	-7	0.0040416	7.90537	0.707922	22	CAAAAACCGACCTTCTCACCAAAACCCCC	CCCCCCCCACGCCCCCCCCCCC	+
motif 8	CMAVAVCMKASMTTCHCAVCAMHACCMCM	MA0978.1	-5	0.00416687	8.15039	0.707922	8	CAAAAACCGACCTTCTCACCAAAACCCCC	GCCGACAT	-
motif 8	CMAVAVCMKASMTTCHCAVCAMHACCMCM	MA1601.2	-7	0.0046628	9.12045	0.75917	12	CAAAAACCGACCTTCTCACCAAAACCCCC	AGGCTTTCCCAC	-
motif 8	CMAVAVCMKASMTTCHCAVCAMHACCMCM	MA1776.1	-10	0.00502905	9.83683	0.786048	19	CAAAAACCGACCTTCTCACCAAAACCCCC	TCCACCTAACATTACCACTAC	+
motif 9	BGWGTGRGAABYKCGTVYGARGGWRTS	MA0553.1	-14	0.000468842	0.917055	1	8	TGTGTGAGAATTTCGTGCGAGGGTATG	GTACGAGG	-
motif 9	BGWGTGRGAABYKCGTVYGARGGWRTS	MA1627.1	-14	0.00124183	2.42902	1	13	TGTGTGAGAATTTCGTGCGAGGGTATG	GTGTGGGGGAGGGG	-
motif 9	BGWGTGRGAABYKCGTVYGARGGWRTS	MA1892.1	-3	0.00159156	3.11308	1	20	TGTGTGAGAATTTCGTGCGAGGGTATG	GGGGGGTGGGCGTGGCGGGG	-
motif 9	BGWGTGRGAABYKCGTVYGARGGWRTS	MA1432.1	-14	0.00193879	3.79227	1	8	TGTGTGAGAATTTCGTGCGAGGGTATG	GTGTGGGG	-
motif 9	BGWGTGRGAABYKCGTVYGARGGWRTS	MA0162.4	-14	0.00230088	4.50052	1	13	TGTGTGAGAATTTCGTGCGAGGGTATG	GGGCGTGGGCGTGG	-
motif 9	BGWGTGRGAABYKCGTVYGARGGWRTS	MA0541.1	-8	0.0037587	7.35202	1	15	TGTGTGAGAATTTCGTGCGAGGGTATG	AATTTCGCGCGCGCG	-
motif 10	YCYCWTYCYATTYCCTCYYCM	MA0080.6	-5	6.24873e-05	0.122225	0.240826	16	CCCCTTCCTATTTCCTCCTCA	TTCCACTTCCTCTTTTT	-
motif 10	YCYCWTYCYATTYCCTCYYCM	MA0640.2	-5	0.000123389	0.241349	0.240826	14	CCCCTTCCTATTTCCTCCTCA	TTCCACTTCCTGGT	+
motif 10	YCYCWTYCYATTYCCTCYYCM	MA0136.3	-7	0.000231884	0.453565	0.282574	12	CCCCTTCCTATTTCCTCCTCA	TCACTTCCTTCT	-
motif 10	YCYCWTYCYATTYCCTCYYCM	MA0081.2	-5	0.000314567	0.615293	0.282574	16	CCCCTTCCTATTTCCTCCTCA	TTTCACTTCCTCTTTT	+
motif 10	YCYCWTYCYATTYCCTCYYCM	MA0062.3	-6	0.000361948	0.707969	0.282574	14	CCCCTTCCTATTTCCTCCTCA	CCCACTTCCTGTTT	+
motif 10	YCYCWTYCYATTYCCTCYYCM	MA0474.3	-6	0.000601803	1.17713	0.391525	14	CCCCTTCCTATTTCCTCCTCA	CCCACTTCCTGTTT	-
motif 10	YCYCWTYCYATTYCCTCYYCM	MA0761.2	-6	0.000916704	1.79307	0.423314	14	CCCCTTCCTATTTCCTCCTCA	TTCACTTCCTGTTT	-
motif 10	YCYCWTYCYATTYCCTCYYCM	MA1404.1	4	0.00102737	2.00954	0.423314	20	CCCCTTCCTATTTCCTCCTCA	TCTCTCTCTCTCTCTCTCTCTCTC	-
motif 10	YCYCWTYCYATTYCCTCYYCM	MA0598.3	1	0.00104731	2.04853	0.423314	14	CCCCTTCCTATTTCCTCCTCA	CTCACTTCCTGTTTC	+
motif 10	YCYCWTYCYATTYCCTCYYCM	MA1402.1	1	0.0010929	2.13772	0.423314	20	CCCCTTCCTATTTCCTCCTCA	CTCTCTCTCTCTCTCTCTCTC	+
motif 10	YCYCWTYCYATTYCCTCYYCM	MA1972.1	-3	0.00119289	2.33328	0.423314	15	CCCCTTCCTATTTCCTCCTCA	CATTCCAGTGCCTCC	-
motif 10	YCYCWTYCYATTYCCTCYYCM	MA1278.1	1	0.00151207	2.95761	0.438877	20	CCCCTTCCTATTTCCTCCTCA	TTTTTTTTTTTTTTACTTTTT	+
motif 10	YCYCWTYCYATTYCCTCYYCM	MA1992.1	-5	0.00154204	3.01622	0.438877	15	CCCCTTCCTATTTCCTCCTCA	CCCCACTTCCTGTCT	-
motif 10	YCYCWTYCYATTYCCTCYYCM	MA1708.1	-8	0.00170805	3.34095	0.438877	11	CCCCTTCCTATTTCCTCCTCA	CACTTCCGCCT	-
motif 10	YCYCWTYCYATTYCCTCYYCM	MA0473.3	-6	0.00179647	3.51389	0.438877	14	CCCCTTCCTATTTCCTCCTCA	CCCACTTCCTGTTT	-
motif 10	YCYCWTYCYATTYCCTCYYCM	MA0508.3	-8	0.00184393	3.60673	0.438877	11	CCCCTTCCTATTTCCTCCTCA	TTCTTTCTCTT	+
motif 10	YCYCWTYCYATTYCCTCYYCM	MA1719.1	-1	0.00191133	3.73856	0.438877	18	CCCCTTCCTATTTCCTCCTCA	CCCTGCATGTCCCCATTT	-
motif 10	YCYCWTYCYATTYCCTCYYCM	MA1652.1	-4	0.00218387	4.27165	0.455211	14	CCCCTTCCTATTTCCTCCTCA	TTCTCACCTCCTCC	-
motif 10	YCYCWTYCYATTYCCTCYYCM	MA1723.1	1	0.00239721	4.68894	0.455211	21	CCCCTTCCTATTTCCTCCTCA	CCTTCTGCTTCCTCCCTGCCCACC	-
motif 10	YCYCWTYCYATTYCCTCYYCM	MA1416.1	0	0.00248352	4.85776	0.455211	14	CCCCTTCCTATTTCCTCCTCA	TCTCTCTCTCTCTC	-
motif 10	YCYCWTYCYATTYCCTCYYCM	MA1981.1	0	0.00253272	4.95399	0.455211	18	CCCCTTCCTATTTCCTCCTCA	TCCCGCCCCTTTCCTTTC	-
motif 10	YCYCWTYCYATTYCCTCYYCM	MA0205.2	-2	0.00256554	5.01821	0.455211	12	CCCCTTCCTATTTCCTCCTCA	TCTCTCTCTTTC	-
motif 10	YCYCWTYCYATTYCCTCYYCM	MA0011.1	-5	0.00284034	5.55571	0.466802	8	CCCCTTCCTATTTCCTCCTCA	TACTATTT	+
motif 10	YCYCWTYCYATTYCCTCYYCM	MA1381.1	-5	0.00287004	5.61379	0.466802	15	CCCCTTCCTATTTCCTCCTCA	TCATTTTCACTCTCC	+
motif 10	YCYCWTYCYATTYCCTCYYCM	MA1710.1	-7	0.00316215	6.18516	0.49374	12	CCCCTTCCTATTTCCTCCTCA	CCCTTGCCTCTC	-
motif 10	YCYCWTYCYATTYCCTCYYCM	MA0712.2	-5	0.00338757	6.62608	0.508593	12	CCCCTTCCTATTTCCTCCTCA	TTCTAATCCCTT	-
motif 10	YCYCWTYCYATTYCCTCYYCM	MA1781.1	-1	0.00474027	9.27196	0.684031	19	CCCCTTCCTATTTCCTCCTCA	ATTTCCCAACTACCTTCTA	+
motif 10	YCYCWTYCYATTYCCTCYYCM	MA1281.1	0	0.00495668	9.69527	0.684031	21	CCCCTTCCTATTTCCTCCTCA	TTTTTTTTTTTTTACTTTTTT	-
motif 10	YCYCWTYCYATTYCCTCYYCM	MA1725.1	-3	0.0050818	9.94	0.684031	13	CCCCTTCCTATTTCCTCCTCA	CATGCTGTTCCCT	+
motif 11	RTSTTRKTGGGTGCAMCWAVC	MA1694.1	0	0.000508967	0.995539	0.634065	14	GTGTTGGTGGGTGCACCAAGC	ATCTTGTCGGGTGC	-
motif 11	RTSTTRKTGGGTGCAMCWAVC	MA1523.1	-6	0.000697739	1.36478	0.634065	10	GTGTTGGTGGGTGCACCAAGC	GTGAGTGTAC	-
motif 11	RTSTTRKTGGGTGCAMCWAVC	MA1766.1	0	0.000746005	1.45919	0.634065	15	GTGTTGGTGGGTGCACCAAGC	AAGTTGGTAGGTGAG	-
motif 11	RTSTTRKTGGGTGCAMCWAVC	MA1031.1	-6	0.00097047	1.89824	0.634065	10	GTGTTGGTGGGTGCACCAAGC	GTGGGCCCAC	+
motif 11	RTSTTRKTGGGTGCAMCWAVC	MA1291.1	-6	0.00104929	2.05242	0.634065	11	GTGTTGGTGGGTGCACCAAGC	GTGGGTCCCAC	-
motif 11	RTSTTRKTGGGTGCAMCWAVC	MA1795.1	-3	0.00134176	2.62448	0.634065	10	GTGTTGGTGGGTGCACCAAGC	ATGGTCGGTG	-
motif 11	RTSTTRKTGGGTGCAMCWAVC	MA1286.1	-5	0.00160003	3.12966	0.634065	12	GTGTTGGTGGGTGCACCAAGC	GTTGGGACCACA	+
motif 11	RTSTTRKTGGGTGCAMCWAVC	MA1771.1	-4	0.00171135	3.3474	0.634065	15	GTGTTGGTGGGTGCACCAAGC	AGTTAGGTGAACAAA	-
motif 11	RTSTTRKTGGGTGCAMCWAVC	MA0695.1	-2	0.00184216	3.60326	0.634065	12	GTGTTGGTGGGTGCACCAAGC	TTCGGTGGTCGC	-
motif 11	RTSTTRKTGGGTGCAMCWAVC	MA1289.1	-5	0.00197537	3.86382	0.634065	13	GTGTTGGTGGGTGCACCAAGC	GTTGGGACCACAT	+
motif 11	RTSTTRKTGGGTGCAMCWAVC	MA1491.2	-1	0.0020124	3.93626	0.634065	16	GTGTTGGTGGGTGCACCAAGC	GCGACGTGGGTGGTCC	-
motif 11	RTSTTRKTGGGTGCAMCWAVC	MA2024.1	-2	0.00211056	4.12825	0.634065	13	GTGTTGGTGGGTGCACCAAGC	GGTGGTAGGTGGA	-
motif 11	RTSTTRKTGGGTGCAMCWAVC	MA1039.1	-5	0.00229831	4.49549	0.641151	8	GTGTTGGTGGGTGCACCAAGC	GGTAGGTG	+
motif 11	RTSTTRKTGGGTGCAMCWAVC	MA1288.1	-6	0.00292435	5.72003	0.685664	13	GTGTTGGTGGGTGCACCAAGC	GTGGGGCCCACAT	-
motif 11	RTSTTRKTGGGTGCAMCWAVC	MA0193.1	-3	0.00328863	6.43256	0.685664	7	GTGTTGGTGGGTGCACCAAGC	TTGGTAG	-
motif 11	RTSTTRKTGGGTGCAMCWAVC	MA1779.1	-3	0.00388179	7.59278	0.685664	11	GTGTTGGTGGGTGCACCAAGC	GTGGTTGGTGG	-
motif 11	RTSTTRKTGGGTGCAMCWAVC	MA1064.1	-6	0.00392695	7.68111	0.685664	10	GTGTTGGTGGGTGCACCAAGC	GTGGGCCCAC	+
motif 11	RTSTTRKTGGGTGCAMCWAVC	MA1532.2	1	0.00397575	7.77657	0.685664	14	GTGTTGGTGGGTGCACCAAGC	TGGGTTAGTAGGTCA	+
motif 11	RTSTTRKTGGGTGCAMCWAVC	MA0576.1	-1	0.00401997	7.86305	0.685664	13	GTGTTGGTGGGTGCACCAAGC	GGGGGGTAGGTGG	+
motif 11	RTSTTRKTGGGTGCAMCWAVC	MA1282.1	-6	0.00401997	7.86305	0.685664	13	GTGTTGGTGGGTGCACCAAGC	GTGGGGACCACAA	+
motif 11	RTSTTRKTGGGTGCAMCWAVC	MA0737.1	-2	0.0040848	7.98987	0.685664	14	GTGTTGGTGGGTGCACCAAGC	CTTCGTGGGGGGTC	-
motif 11	RTSTTRKTGGGTGCAMCWAVC	MA0587.1	-6	0.00422311	8.2604	0.685664	10	GTGTTGGTGGGTGCACCAAGC	CCGGGTCCAC	-
motif 11	RTSTTRKTGGGTGCAMCWAVC	MA1287.1	-4	0.00460694	9.01117	0.685664	14	GTGTTGGTGGGTGCACCAAGC	AAGTGGGGCCCACA	-
motif 11	RTSTTRKTGGGTGCAMCWAVC	MA1008.1	-4	0.00487616	9.53777	0.685664	10	GTGTTGGTGGGTGCACCAAGC	TTGTCGGTGA	+
motif 11	RTSTTRKTGGGTGCAMCWAVC	MA0039.4	-2	0.00505539	9.88835	0.685664	12	GTGTTGGTGGGTGCACCAAGC	GGGGGTGGGGCG	-

## Sheet: Sheet6
Table S6. Significant GO term enriched by GOMO analysis for drought stress DEGs.
Motif_Identifier	GO_Term_Identifier	GOMo_Score	p-value	q-value
AAAAWAAAWAAAWWWAAAAWA	GO:0003700	0.0001118	2.652e-07	0.0009976
AAAAWAAAWAAAWWWAAAAWA	GO:0005886	0.01115	1.061e-06	0.001663
AAAAWAAAWAAAWWWAAAAWA	GO:0003677	0.01223	1.326e-06	0.001663
AAAAWAAAWAAAWWWAAAAWA	GO:0005634	0.0193	9.547e-06	0.00818
AAAAWAAAWAAAWWWAAAAWA	GO:0045449	0.01964	1.087e-05	0.00818
AAAAWAAAWAAAWWWAAAAWA	GO:0009414	0.02305	2.307e-05	0.01446
BGWGTGRGAABYKCGTVYGARGGWRTS	GO:0009507	0.0007502	2.652e-07	0.0003323
BGWGTGRGAABYKCGTVYGARGGWRTS	GO:0003677	0.003991	2.652e-07	0.0003323
BGWGTGRGAABYKCGTVYGARGGWRTS	GO:0003700	0.004533	2.652e-07	0.0003323
BGWGTGRGAABYKCGTVYGARGGWRTS	GO:0005634	0.01573	3.978e-06	0.003738
BGWGTGRGAABYKCGTVYGARGGWRTS	GO:0006270	0.02444	2.44e-05	0.01834
BGWGTGRGAABYKCGTVYGARGGWRTS	GO:0048589	0.02625	3.235e-05	0.02027
BGWGTGRGAABYKCGTVYGARGGWRTS	GO:0005739	0.0296	5.277e-05	0.02834
BGWGTGRGAABYKCGTVYGARGGWRTS	GO:0046686	0.03426	9.759e-05	0.04585
BYTTTCYYTYYYTCT	GO:0003700	7.092e-14	2.652e-07	7.024e-05
BYTTTCYYTYYYTCT	GO:0005634	3.943e-08	2.652e-07	7.024e-05
BYTTTCYYTYYYTCT	GO:0003677	4.698e-07	2.652e-07	7.024e-05
BYTTTCYYTYYYTCT	GO:0045449	3.324e-05	2.652e-07	7.024e-05
BYTTTCYYTYYYTCT	GO:0005886	5.552e-05	2.652e-07	7.024e-05
BYTTTCYYTYYYTCT	GO:0006355	0.000169	2.652e-07	7.024e-05
BYTTTCYYTYYYTCT	GO:0005515	0.0002119	2.652e-07	7.024e-05
BYTTTCYYTYYYTCT	GO:0004674	0.0007921	2.652e-07	7.024e-05
BYTTTCYYTYYYTCT	GO:0016301	0.001227	2.652e-07	7.024e-05
BYTTTCYYTYYYTCT	GO:0007169	0.001729	2.652e-07	7.024e-05
BYTTTCYYTYYYTCT	GO:0006468	0.002209	2.652e-07	7.024e-05
BYTTTCYYTYYYTCT	GO:0048366	0.002319	2.652e-07	7.024e-05
BYTTTCYYTYYYTCT	GO:0016563	0.002892	2.652e-07	7.024e-05
BYTTTCYYTYYYTCT	GO:0009908	0.005963	2.652e-07	7.024e-05
BYTTTCYYTYYYTCT	GO:0043565	0.01397	2.387e-06	0.00059
BYTTTCYYTYYYTCT	GO:0009944	0.01688	3.978e-06	0.0009219
BYTTTCYYTYYYTCT	GO:0045941	0.01928	9.281e-06	0.002024
BYTTTCYYTYYYTCT	GO:0007623	0.01955	1.008e-05	0.002076
BYTTTCYYTYYYTCT	GO:0005829	0.02495	2.413e-05	0.00471
BYTTTCYYTYYYTCT	GO:0009744	0.02682	3.156e-05	0.005759
BYTTTCYYTYYYTCT	GO:0005524	0.02699	3.262e-05	0.005759
BYTTTCYYTYYYTCT	GO:0010154	0.02829	4.296e-05	0.006719
BYTTTCYYTYYYTCT	GO:0004672	0.02836	4.349e-05	0.006719
BYTTTCYYTYYYTCT	GO:0048440	0.0284	4.349e-05	0.006719
BYTTTCYYTYYYTCT	GO:0003777	0.02908	4.906e-05	0.007277
BYTTTCYYTYYYTCT	GO:0009749	0.03423	0.0001042	0.01486
BYTTTCYYTYYYTCT	GO:0048481	0.03495	0.0001111	0.01526
BYTTTCYYTYYYTCT	GO:0010599	0.03671	0.0001347	0.01737
BYTTTCYYTYYYTCT	GO:0009741	0.03678	0.0001371	0.01737
BYTTTCYYTYYYTCT	GO:0010051	0.03704	0.0001405	0.01737
BYTTTCYYTYYYTCT	GO:0048367	0.03735	0.0001464	0.01751
BYTTTCYYTYYYTCT	GO:0048827	0.03846	0.0001668	0.01933
BYTTTCYYTYYYTCT	GO:0009736	0.04041	0.000205	0.02303
BYTTTCYYTYYYTCT	GO:0010158	0.04232	0.0002506	0.02733
BYTTTCYYTYYYTCT	GO:0016481	0.0429	0.0002631	0.02787
BYTTTCYYTYYYTCT	GO:0010050	0.04424	0.000301	0.031
BYTTTCYYTYYYTCT	GO:0009965	0.0458	0.0003471	0.03479
BYTTTCYYTYYYTCT	GO:0035196	0.04971	0.0004924	0.04805
BYTTTCYYTYYYTCT	GO:0009740	0.05024	0.0005145	0.04891
CMAVAVCMKASMTTCHCAVCAMHACCMCM	GO:0009507	0.001442	2.652e-07	0.0009986
CMMCHVCAMCAMCMM	GO:0009507	0.007622	5.304e-07	0.0015
CMMCHVCAMCAMCMM	GO:0003700	0.01027	7.955e-07	0.0015
CMMCHVCAMCAMCMM	GO:0009773	0.01545	3.447e-06	0.004332
DKDRRRRDDRARGARDGDGDGARARRRDRRRRRRRARRGRR	GO:0003700	8.646e-12	2.652e-07	6.098e-05
DKDRRRRDDRARGARDGDGDGARARRRDRRRRRRRARRGRR	GO:0003677	1.16e-07	2.652e-07	6.098e-05
DKDRRRRDDRARGARDGDGDGARARRRDRRRRRRRARRGRR	GO:0005634	1.752e-07	2.652e-07	6.098e-05
DKDRRRRDDRARGARDGDGDGARARRRDRRRRRRRARRGRR	GO:0009507	4.829e-06	2.652e-07	6.098e-05
DKDRRRRDDRARGARDGDGDGARARRRDRRRRRRRARRGRR	GO:0045449	6.799e-05	2.652e-07	6.098e-05
DKDRRRRDDRARGARDGDGDGARARRRDRRRRRRRARRGRR	GO:0005515	0.0001657	2.652e-07	6.098e-05
DKDRRRRDDRARGARDGDGDGARARRRDRRRRRRRARRGRR	GO:0005886	0.000468	2.652e-07	6.098e-05
DKDRRRRDDRARGARDGDGDGARARRRDRRRRRRRARRGRR	GO:0048366	0.001168	2.652e-07	6.098e-05
DKDRRRRDDRARGARDGDGDGARARRRDRRRRRRRARRGRR	GO:0006355	0.001518	2.652e-07	6.098e-05
DKDRRRRDDRARGARDGDGDGARARRRDRRRRRRRARRGRR	GO:0006468	0.001865	2.652e-07	6.098e-05
DKDRRRRDDRARGARDGDGDGARARRRDRRRRRRRARRGRR	GO:0004674	0.002296	2.652e-07	6.098e-05
DKDRRRRDDRARGARDGDGDGARARRRDRRRRRRRARRGRR	GO:0005524	0.003119	2.652e-07	6.098e-05
DKDRRRRDDRARGARDGDGDGARARRRDRRRRRRRARRGRR	GO:0007169	0.005462	2.652e-07	6.098e-05
DKDRRRRDDRARGARDGDGDGARARRRDRRRRRRRARRGRR	GO:0003777	0.007221	2.652e-07	6.098e-05
DKDRRRRDDRARGARDGDGDGARARRRDRRRRRRRARRGRR	GO:0016563	0.008316	2.652e-07	6.098e-05
DKDRRRRDDRARGARDGDGDGARARRRDRRRRRRRARRGRR	GO:0009908	0.01	2.652e-07	6.098e-05
DKDRRRRDDRARGARDGDGDGARARRRDRRRRRRRARRGRR	GO:0048481	0.0141	2.121e-06	0.0004591
DKDRRRRDDRARGARDGDGDGARARRRDRRRRRRRARRGRR	GO:0016301	0.01853	7.955e-06	0.001626
DKDRRRRDDRARGARDGDGDGARARRRDRRRRRRRARRGRR	GO:0010158	0.02004	1.034e-05	0.002003
DKDRRRRDDRARGARDGDGDGARARRRDRRRRRRRARRGRR	GO:0009944	0.02082	1.273e-05	0.002342
DKDRRRRDDRARGARDGDGDGARARRRDRRRRRRRARRGRR	GO:0010051	0.02578	2.917e-05	0.004878
DKDRRRRDDRARGARDGDGDGARARRRDRRRRRRRARRGRR	GO:0035196	0.02579	2.917e-05	0.004878
DKDRRRRDDRARGARDGDGDGARARRRDRRRRRRRARRGRR	GO:0004842	0.02681	3.447e-05	0.005366
DKDRRRRDDRARGARDGDGDGARARRRDRRRRRRRARRGRR	GO:0048364	0.02685	3.5e-05	0.005366
DKDRRRRDDRARGARDGDGDGARARRRDRRRRRRRARRGRR	GO:0016481	0.02749	3.951e-05	0.005815
DKDRRRRDDRARGARDGDGDGARARRRDRRRRRRRARRGRR	GO:0010154	0.0311	6.683e-05	0.009456
DKDRRRRDDRARGARDGDGDGARARRRDRRRRRRRARRGRR	GO:0004672	0.03215	7.77e-05	0.01059
DKDRRRRDDRARGARDGDGDGARARRRDRRRRRRRARRGRR	GO:0043565	0.03334	9.52e-05	0.01251
DKDRRRRDDRARGARDGDGDGARARRRDRRRRRRRARRGRR	GO:0005983	0.03472	0.000118	0.01393
DKDRRRRDDRARGARDGDGDGARARRRDRRRRRRRARRGRR	GO:0005737	0.03474	0.0001185	0.01393
DKDRRRRDDRARGARDGDGDGARARRRDRRRRRRRARRGRR	GO:0010182	0.03488	0.0001196	0.01393
DKDRRRRDDRARGARDGDGDGARARRRDRRRRRRRARRGRR	GO:0008017	0.03516	0.000123	0.01393
DKDRRRRDDRARGARDGDGDGARARRRDRRRRRRRARRGRR	GO:0031225	0.03554	0.0001249	0.01393
DKDRRRRDDRARGARDGDGDGARARRRDRRRRRRRARRGRR	GO:0048440	0.03813	0.0001713	0.01812
DKDRRRRDDRARGARDGDGDGARARRRDRRRRRRRARRGRR	GO:0010599	0.03818	0.0001724	0.01812
DKDRRRRDDRARGARDGDGDGARARRRDRRRRRRRARRGRR	GO:0010050	0.04173	0.0002532	0.02588
DKDRRRRDDRARGARDGDGDGARARRRDRRRRRRRARRGRR	GO:0010267	0.04262	0.0002742	0.02727
DKDRRRRDDRARGARDGDGDGARARRRDRRRRRRRARRGRR	GO:0009535	0.04303	0.0002835	0.02745
DKDRRRRDDRARGARDGDGDGARARRRDRRRRRRRARRGRR	GO:0048367	0.04344	0.0002978	0.02809
DKDRRRRDDRARGARDGDGDGARARRRDRRRRRRRARRGRR	GO:0016049	0.04478	0.0003365	0.03095
DKDRRRRDDRARGARDGDGDGARARRRDRRRRRRRARRGRR	GO:0010252	0.04693	0.0004047	0.03631
DKDRRRRDDRARGARDGDGDGARARRRDRRRRRRRARRGRR	GO:0009611	0.04757	0.0004285	0.03754
DKDRRRRDDRARGARDGDGDGARARRRDRRRRRRRARRGRR	GO:0009965	0.04915	0.0004935	0.04223
DKDRRRRDDRARGARDGDGDGARARRRDRRRRRRRARRGRR	GO:0003723	0.0506	0.0005611	0.04692
TATATATATATATATATATATATATATATATATATATATAT	GO:0003700	8.481e-08	2.652e-07	0.00025
TATATATATATATATATATATATATATATATATATATATAT	GO:0012505	4.249e-06	2.652e-07	0.00025
TATATATATATATATATATATATATATATATATATATATAT	GO:0045449	0.0005126	2.652e-07	0.00025
TATATATATATATATATATATATATATATATATATATATAT	GO:0003677	0.006746	2.652e-07	0.00025
TATATATATATATATATATATATATATATATATATATATAT	GO:0006355	0.02857	4.508e-05	0.034
TATATATATATATATATATATATATATATATATATATATAT	GO:0006857	0.03166	6.656e-05	0.04183
TATATATATATATATATATATATATATATATATATATATAT	GO:0046982	0.03343	8.141e-05	0.04386
TTTTTTTTTYTTTTT	GO:0003700	2.303e-05	2.652e-07	0.0002492
TTTTTTTTTYTTTTT	GO:0045449	0.002885	2.652e-07	0.0002492
TTTTTTTTTYTTTTT	GO:0005886	0.006144	2.652e-07	0.0002492
TTTTTTTTTYTTTTT	GO:0003677	0.009888	2.652e-07	0.0002492
TTTTTTTTTYTTTTT	GO:0005634	0.01119	5.304e-07	0.0003987
TTTTTTTTTYTTTTT	GO:0009414	0.01853	5.038e-06	0.003156
WYYTTCTYYYTYTYTYTYTY	GO:0003700	4.758e-14	2.652e-07	6.505e-05
WYYTTCTYYYTYTYTYTYTY	GO:0005634	1.105e-07	2.652e-07	6.505e-05
WYYTTCTYYYTYTYTYTYTY	GO:0005886	8.967e-07	2.652e-07	6.505e-05
WYYTTCTYYYTYTYTYTYTY	GO:0003677	1.413e-06	2.652e-07	6.505e-05
WYYTTCTYYYTYTYTYTYTY	GO:0045449	7.177e-06	2.652e-07	6.505e-05
WYYTTCTYYYTYTYTYTYTY	GO:0004674	0.0001606	2.652e-07	6.505e-05
WYYTTCTYYYTYTYTYTYTY	GO:0006468	0.0002716	2.652e-07	6.505e-05
WYYTTCTYYYTYTYTYTYTY	GO:0006355	0.0002836	2.652e-07	6.505e-05
WYYTTCTYYYTYTYTYTYTY	GO:0005515	0.000369	2.652e-07	6.505e-05
WYYTTCTYYYTYTYTYTYTY	GO:0007169	0.0005426	2.652e-07	6.505e-05
WYYTTCTYYYTYTYTYTYTY	GO:0016301	0.002285	2.652e-07	6.505e-05
WYYTTCTYYYTYTYTYTYTY	GO:0048366	0.003111	2.652e-07	6.505e-05
WYYTTCTYYYTYTYTYTYTY	GO:0016563	0.004153	2.652e-07	6.505e-05
WYYTTCTYYYTYTYTYTYTY	GO:0005524	0.007212	2.652e-07	6.505e-05
WYYTTCTYYYTYTYTYTYTY	GO:0007623	0.008198	2.652e-07	6.505e-05
WYYTTCTYYYTYTYTYTYTY	GO:0004672	0.01053	5.304e-07	0.000122
WYYTTCTYYYTYTYTYTYTY	GO:0009908	0.01257	1.856e-06	0.0004018
WYYTTCTYYYTYTYTYTYTY	GO:0003777	0.01366	3.182e-06	0.0006505
WYYTTCTYYYTYTYTYTYTY	GO:0048481	0.01823	8.751e-06	0.001695
WYYTTCTYYYTYTYTYTYTY	GO:0009944	0.01994	1.061e-05	0.001952
WYYTTCTYYYTYTYTYTYTY	GO:0010051	0.02096	1.379e-05	0.002416
WYYTTCTYYYTYTYTYTYTY	GO:0043565	0.02149	1.458e-05	0.002439
WYYTTCTYYYTYTYTYTYTY	GO:0003723	0.02424	2.493e-05	0.003988
WYYTTCTYYYTYTYTYTYTY	GO:0008270	0.02541	3.182e-05	0.004879
WYYTTCTYYYTYTYTYTYTY	GO:0005737	0.02727	4.163e-05	0.006128
WYYTTCTYYYTYTYTYTYTY	GO:0009744	0.02858	4.879e-05	0.006866
WYYTTCTYYYTYTYTYTYTY	GO:0009965	0.0288	5.038e-05	0.006866
WYYTTCTYYYTYTYTYTYTY	GO:0010599	0.03294	9.494e-05	0.01248
WYYTTCTYYYTYTYTYTYTY	GO:0048364	0.0336	0.0001026	0.01302
WYYTTCTYYYTYTYTYTYTY	GO:0004842	0.03502	0.0001185	0.01454
WYYTTCTYYYTYTYTYTYTY	GO:0009826	0.03537	0.0001228	0.01457
WYYTTCTYYYTYTYTYTYTY	GO:0009733	0.03584	0.0001299	0.01494
WYYTTCTYYYTYTYTYTYTY	GO:0010158	0.03631	0.0001376	0.01535
WYYTTCTYYYTYTYTYTYTY	GO:0035196	0.03748	0.0001533	0.01586
WYYTTCTYYYTYTYTYTYTY	GO:0003676	0.03751	0.0001538	0.01586
WYYTTCTYYYTYTYTYTYTY	GO:0004722	0.03764	0.0001551	0.01586
WYYTTCTYYYTYTYTYTYTY	GO:0004712	0.03785	0.0001596	0.01588
WYYTTCTYYYTYTYTYTYTY	GO:0010050	0.03879	0.0001737	0.01673
WYYTTCTYYYTYTYTYTYTY	GO:0007010	0.03902	0.0001787	0.01673
WYYTTCTYYYTYTYTYTYTY	GO:0010154	0.03952	0.0001893	0.01673
WYYTTCTYYYTYTYTYTYTY	GO:0006511	0.03957	0.0001899	0.01673
WYYTTCTYYYTYTYTYTYTY	GO:0045941	0.03964	0.0001909	0.01673
WYYTTCTYYYTYTYTYTYTY	GO:0048367	0.04422	0.0003119	0.02669
WYYTTCTYYYTYTYTYTYTY	GO:0046658	0.04618	0.0003683	0.0308
WYYTTCTYYYTYTYTYTYTY	GO:0009658	0.04918	0.0004773	0.03903
WYYTTCTYYYTYTYTYTYTY	GO:0048440	0.05019	0.0005237	0.04189
WYYTTCTYYYTYTYTYTYTY	GO:0009507	0.05143	0.0005794	0.04536
WYYTTCTYYYTYTYTYTYTY	GO:0016564	0.05191	0.0005998	0.04543
WYYTTCTYYYTYTYTYTYTY	GO:0010091	0.05205	0.0006059	0.04543
WYYTTCTYYYTYTYTYTYTY	GO:0003779	0.05229	0.0006173	0.04543
WYYTTCTYYYTYTYTYTYTY	GO:0009751	0.05298	0.0006526	0.04709
YCYCWTYCYATTYCCTCYYCM	GO:0003700	2.53e-09	2.652e-07	0.0001412
YCYCWTYCYATTYCCTCYYCM	GO:0003677	1.089e-06	2.652e-07	0.0001412
YCYCWTYCYATTYCCTCYYCM	GO:0005634	1.509e-05	2.652e-07	0.0001412
YCYCWTYCYATTYCCTCYYCM	GO:0045449	0.0006115	2.652e-07	0.0001412
YCYCWTYCYATTYCCTCYYCM	GO:0006355	0.0009978	2.652e-07	0.0001412
YCYCWTYCYATTYCCTCYYCM	GO:0005886	0.003518	2.652e-07	0.0001412
YCYCWTYCYATTYCCTCYYCM	GO:0009507	0.004016	2.652e-07	0.0001412
YCYCWTYCYATTYCCTCYYCM	GO:0005515	0.0136	1.326e-06	0.0006178
YCYCWTYCYATTYCCTCYYCM	GO:0016563	0.01399	1.591e-06	0.000659
YCYCWTYCYATTYCCTCYYCM	GO:0048366	0.01883	6.895e-06	0.00257
YCYCWTYCYATTYCCTCYYCM	GO:0009744	0.02382	2.413e-05	0.008178
YCYCWTYCYATTYCCTCYYCM	GO:0004674	0.02687	4.004e-05	0.01244
YCYCWTYCYATTYCCTCYYCM	GO:0003777	0.02731	4.349e-05	0.01247
YCYCWTYCYATTYCCTCYYCM	GO:0005524	0.02911	5.887e-05	0.01496
YCYCWTYCYATTYCCTCYYCM	GO:0006468	0.02926	6.02e-05	0.01496
YCYCWTYCYATTYCCTCYYCM	GO:0048364	0.032	8.459e-05	0.01748
YCYCWTYCYATTYCCTCYYCM	GO:0010158	0.03208	8.539e-05	0.01748
YCYCWTYCYATTYCCTCYYCM	GO:0016301	0.03246	8.91e-05	0.01748
YCYCWTYCYATTYCCTCYYCM	GO:0004842	0.03247	8.91e-05	0.01748
YCYCWTYCYATTYCCTCYYCM	GO:0009965	0.03488	0.0001207	0.02175
YCYCWTYCYATTYCCTCYYCM	GO:0048481	0.03499	0.0001233	0.02175
YCYCWTYCYATTYCCTCYYCM	GO:0003723	0.03546	0.0001283	0.02175
YCYCWTYCYATTYCCTCYYCM	GO:0007169	0.03604	0.0001363	0.02209
YCYCWTYCYATTYCCTCYYCM	GO:0010050	0.03914	0.0001946	0.03023
YCYCWTYCYATTYCCTCYYCM	GO:0009944	0.03988	0.0002129	0.03175
YCYCWTYCYATTYCCTCYYCM	GO:0010599	0.04197	0.0002623	0.0376
YCYCWTYCYATTYCCTCYYCM	GO:0035196	0.04467	0.0003413	0.04579
YCYCWTYCYATTYCCTCYYCM	GO:0009535	0.04483	0.0003439	0.04579
# GOMo (Gene Ontology for Motifs): Version 5.4.1 compiled on Aug 25 2021 at 17:37:45
# The format of this file is described at https://meme-suite.org/meme/doc/gomo-output-format.html.
# gomo --nostatus --verbosity 1 --oc . --t 0.05 --shuffle_scores 1000 --dag db/go.dag --motifs meme.txt db/plant_arabidopsis_1000_199.na.csv plant_arabidopsis_1000_199.na.cisml plant_oryza_sativa_1000_199.na.cisml plant_populus_trichocarpa_1000_199.na.cisml plant_sorghum_brachupodium_1000_199.na.cisml plant_brachypodium_1000_199.na.cisml
